# Supplementary material for: Ceapins block the unfolded protein response sensor ATF6α by inducing a neomorphic inter-organelle tether
Source: eLife. 2019 May 31;8:e46595. doi: 10.7554/eLife.46595 (PMC6588346; doi:10.7554/eLife.46595)
Supplement: Figure 6—source data 1. [file elife-46595-fig6-data1.xlsx]

## Sheet: Sheet1
			Tg+Ceapin-A7 vs DMSO	Tg+Ceapin-A7 vs DMSO	Tg+Ceapin-A7 vs DMSO	Tg+Ceapin-A5 vs DMSO	Tg+Ceapin-A5 vs DMSO	Tg+Ceapin-A5 vs DMSO
Uniprot	Gene	Description	Average log2 difference	St. Dev.	p-value	Average	St. Dev.	p-value
P18850	ATF6	Cyclic AMP-dependent transcription factor ATF-6 alpha OS
P28288	ABCD3	ATP-binding cassette sub-family D member 3 OS	3.07675	0.544026	9.06097e-07	0.124399	0.52962	0.527735
Q13501	SQSTM1	Sequestosome-1 OS	2.89681	0.152157	0.023634	0.0717746	0.197026	0.697146
Q8NBU5	ATAD1	ATPase family AAA domain-containing protein 1 OS	2.62188	1.14948	0.0197513	-0.457411	0.42992	0.123258
Q8IZ07	ANKRD13A	Ankyrin repeat domain-containing protein 13A OS	2.42234	0.483883	0.0130415	-0.218455	0.108046	0.0727542
Q9Y2K1	ZBTB1	Zinc finger and BTB domain-containing protein 1 OS	2.4066	0.281044	0.0524508	0.00751212	0.154348	0.956251
P53985	SLC16A1	Monocarboxylate transporter 1 OS	2.25901	0.181954	0.0362193	0.0640032	0.204529	0.734758
P30419	NMT1	Glycylpeptide N-tetradecanoyltransferase 1 OS	2.25353	0.642789	0.0260643	0.0643775	0.150083	0.534925
O14786	NRP1	Neuropilin-1 OS	2.24081	0.0564763	0.0113444	0.110394	0.0151159	0.0614474
P62979	RPS27A	Ubiquitin-40S ribosomal protein S27a OS	2.12706	0.307942	0.0649449	0.119964	0.00419792	0.0157493
O75487	GPC4	Glypican-4 OS	2.11005	0.136782	0.0291607	0.229789	0.0562898	0.109189
P40939	HADHA	Trifunctional enzyme subunit alpha, mitochondrial OS	2.10619	0.380144	0.010685	0.144272	0.070664	0.0714968
P18031	PTPN1	Tyrosine-protein phosphatase non-receptor type 1 OS	2.06248	0.281686	0.000690658	-0.201386	0.141991	0.0658304
O75323	GBAS	Protein NipSnap homolog 2 OS	2.05936	0.74262	0.158943	0.14309	0.00179337	0.00564178
P15311	EZR	Ezrin OS	1.99734	0.142109	0.00168316	-0.0395261	0.211691	0.777075
P26038	MSN	Moesin OS	1.88694	0.472891	0.0203003	0.122979	0.0972561	0.159914
P19105	MYL12A	Myosin regulatory light chain 12A OS	1.84663	0.083295	0.0202981	0.355711	0.768625	0.631067
P35613	BSG	Basigin OS	1.84035	0.138902	0.0018935	-0.0366667	0.0881043	0.545881
P61224	RAP1B	Ras-related protein Rap-1b OS	1.82629	0.668012	0.0418197	-0.10813	0.0277532	0.021261
Q9Y4B6	VPRBP	Protein VPRBP OS	1.77961	0.169229	0.0427425	0.379275	0.471765	0.459255
O60858	TRIM13	E3 ubiquitin-protein ligase TRIM13 OS	1.76383	0.230678	0.00565302	-0.080052	0.454103	0.788957
P07355	ANXA2	Annexin A2 OS	1.74768	0.2651	0.000942547	-0.115893	0.292435	0.485904
Q92896	GLG1	Golgi apparatus protein 1 OS	1.74137	0.0769929	0.000650991	0.105857	0.100315	0.209107
P05556	ITGB1	Integrin beta-1 OS	1.70427	0.640828	0.0440389	0.21036	0.235072	0.261284
P68133	ACTA1	Actin, alpha skeletal muscle OS	1.69261	0.0709266	0.0188577	0.599715	0.681545	0.430945
P15153	RAC2	Ras-related C3 botulinum toxin substrate 2 OS	1.69218	0.043265	0.0115082	-0.06416	0.0212687	0.146579
P35052	GPC1	Glypican-1 OS	1.67984	0.218928	0.0585026	-0.0640314	0.108038	0.555904
P55084	HADHB	Trifunctional enzyme subunit beta, mitochondrial OS	1.67891	0.266799	0.00831287	-0.173805	0.155609	0.192703
P11166	SLC2A1	Solute carrier family 2, facilitated glucose transporter member 1 OS	1.6392	0.183022	0.0501577	-0.0388363	0.0211557	0.234068
P61586	RHOA	Transforming protein RhoA OS	1.63641	0.620541	0.0447405	-0.245456	0.244174	0.223784
O60551	NMT2	Glycylpeptide N-tetradecanoyltransferase 2 OS	1.59518	0.422751	0.02262	0.196104	0.275477	0.342836
Q96ER3	SAAL1	Protein SAAL1 OS	1.58886	0.0918261	0.0260018	0.132546	0.0579236	0.190797
Q9Y4F1	FARP1	FERM, RhoGEF and pleckstrin domain-containing protein 1 OS	1.57445	0.0981594	0.0280471	-0.117235	0.0243376	0.0927885
P16615	ATP2A2	Sarcoplasmic/endoplasmic reticulum calcium ATPase 2 OS	0.396573	0.449003	0.265697	-0.196947	0.431569	0.512118
Q99941	ATF6B	Cyclic AMP-dependent transcription factor ATF-6 beta OS	0.191011	0.165392	0.0223517	-0.0236071	0.262214	0.819654
Q9H4B7	TUBB1	Tubulin beta-1 chain OS	-0.0421918	0.451357	0.863624	-0.229653	0.117556	0.0297793
Q9NVI7	ATAD3A	ATPase family AAA domain-containing protein 3A OS	-0.513028	0.345502	0.00772497	0.545375	0.306682	0.00330911
O94905	ERLIN2	Erlin-2 OS	0.226738	0.291776	0.21797	1.18856	0.226125	0.0018382
P38646	HSPA9	Stress-70 protein, mitochondrial OS	0.182253	0.361978	0.231186	0.0659237	0.290218	0.569839
Q5T9A4	ATAD3B	ATPase family AAA domain-containing protein 3B OS	-0.439528	0.339025	0.0441648	0.692118	0.26189	0.00410484
P10809	HSPD1	60 kDa heat shock protein, mitochondrial OS	-0.205491	0.459042	0.28105	0.506507	0.200385	0.000541924
P28072	PSMB6	Proteasome subunit beta type-6 OS	0.923867	0.104796	0.000397728	0.034603	0.275667	0.817989
contaminant_GR78_HUMAN		owl|P11021| 78 KD GLUCOSE REGULATED PROTEIN PRECURSOR (GRP 78) (IMMUNOGLOBULIN...	-0.2057	0.326267	0.388835	-0.601779	0.145629	0.0189674
P19338	NCL	Nucleolin OS	0.199177	0.139532	0.0331555	0.0924487	0.4672	0.681023
Q9BQE3	TUBA1C	Tubulin alpha-1C chain OS	-0.093427	0.151175	0.304411	-0.350262	0.164909	0.0239019
P11021	HSPA5	78 kDa glucose-regulated protein OS	-0.0655578	0.615	0.757317	-0.206298	0.717677	0.413592
Q15366	PCBP2	Poly(rC)-binding protein 2 OS	0.278312	0.338267	0.198414	-0.265304	0.177668	0.0582926
Q92598	HSPH1	Heat shock protein 105 kDa OS	-0.688178	0.28583	0.0170597	-0.86767	0.203104	0.0033687
P49411	TUFM	Elongation factor Tu, mitochondrial OS	0.0321895	0.256563	0.818074	-0.0544412	0.149073	0.518018
P07437	TUBB	Tubulin beta chain OS	-0.0973737	0.334145	0.600929	-0.428115	0.186921	0.0195328
P48556	PSMD8	26S proteasome non-ATPase regulatory subunit 8 OS	0.937013	0.128756	0.000703261	-0.0346919	0.312063	0.838327
O95831	AIFM1	Apoptosis-inducing factor 1, mitochondrial OS	-0.417621	0.320169	0.0797705	0.188903	0.109942	0.041344
Q06830	PRDX1	Peroxiredoxin-1 OS	0.539876	0.433291	0.0883297	-0.116964	0.400732	0.600377
P42898	MTHFR	Methylenetetrahydrofolate reductase OS	0.661863	0.484515	0.0718159	0.71187	0.222721	0.00775297
P52292	KPNA2	Importin subunit alpha-1 OS	0.605651	0.200922	0.00914883	-0.0572788	0.154854	0.513066
P08670	VIM	Vimentin OS	0.109871	0.183281	0.251169	0.127844	0.412077	0.526035
P14618	PKM	Pyruvate kinase PKM OS	0.460872	0.220292	0.0248791	-0.457819	0.382979	0.0966694
P12277	CKB	Creatine kinase B-type OS	0.735539	0.458208	0.0489375	-0.342906	0.742119	0.42358
Q13200	PSMD2	26S proteasome non-ATPase regulatory subunit 2 OS	1.03295	0.245457	0.018307	0.367782	0.152357	0.052721
Q15008	PSMD6	26S proteasome non-ATPase regulatory subunit 6 OS	0.771333	0.222065	0.0265336	0.110425	0.0973576	0.188417
P62191	PSMC1	26S protease regulatory subunit 4 OS	0.803571	0.121832	0.00757529	0.119324	0.266583	0.519292
Q99460	PSMD1	26S proteasome non-ATPase regulatory subunit 1 OS	0.550548	0.145635	0.0225393	0.101385	0.0950129	0.205825
P25205	MCM3	DNA replication licensing factor MCM3 OS	0.233042	0.240711	0.235563	0.112858	0.168971	0.366834
P23258	TUBG1	Tubulin gamma-1 chain OS	0.283813	0.26237	0.201845	-0.103412	0.230346	0.51819
Q86XI2	NCAPG2	Condensin-2 complex subunit G2 OS	0.23411	0.0916819	0.0475081	0.0550389	0.0927562	0.412116
Q96KA5	CLPTM1L	Cleft lip and palate transmembrane protein 1-like protein OS	0.17713	0.20424	0.271905	-0.0902371	0.0572081	0.111926
Q9UHI6	DDX20	Probable ATP-dependent RNA helicase DDX20 OS	0.921894	0.495285	0.0842334	0.221004	0.324207	0.359115
Q9P0J0	NDUFA13	NADH dehydrogenase [ubiquinone] 1 alpha subcomplex subunit 13 OS	0.0646941	0.354037	0.781602	0.178117	0.0505644	0.025827
Q9GZP9	DERL2	Derlin-2 OS	-0.191561	0.227324	0.281825	0.279344	0.235397	0.176167
P06733	ENO1	Alpha-enolase OS	1.00168	0.259693	0.0216788	0.266358	0.387367	0.355846
P19784	CSNK2A2	Casein kinase II subunit alpha&#039; OS	0.911305	0.283289	0.0307342	0.0660318	0.162169	0.553724
P04350	TUBB4A	Tubulin beta-4A chain OS	-0.15758	0.318801	0.482125	-0.611869	0.335129	0.0871264
Q5UIP0	RIF1	Telomere-associated protein RIF1 OS	0.854616	0.266002	0.0308083	0.255761	0.0874289	0.0368138
Q16531	DDB1	DNA damage-binding protein 1 OS	0.254958	0.281762	0.257569	0.189955	0.0516874	0.0238025
Q92900	UPF1	Regulator of nonsense transcripts 1 OS	0.0378321	0.0663838	0.427649	0.143074	0.0463933	0.0333074
O43248	HOXC11	Homeobox protein Hox-C11 OS	-0.814746	0.0700966	0.0386817	-0.302022	0.128215	0.185654
O43633	CHMP2A	Charged multivesicular body protein 2a OS	-0.627599	0.287864	0.199661	-0.312078	0.54818	0.568468
Q15773	MLF2	Myeloid leukemia factor 2 OS	-0.314902	0.02264	0.0323364	-0.125908	0.223578	0.571841
Q8N9N5	BANP	Protein BANP OS	-1.17203	0.276455	0.105214	-0.381615	0.278694	0.303465
P68400	CSNK2A1	Casein kinase II subunit alpha OS	0.755947	0.0617144	0.0367095	0.0810014	0.0596915	0.305813
P68363	TUBA1B	Tubulin alpha-1B chain OS	-0.13549	0.124829	0.367587	-0.40681	0.0982368	0.107666
Q13207	TBX2	T-box transcription factor TBX2 OS	-0.872618	0.0827024	0.0426001	-0.186942	0.104413	0.239457
Q9Y6J0	CABIN1	Calcineurin-binding protein cabin-1 OS	-0.800322	0.0816426	0.0458422	-0.138947	0.518602	0.769423
P25490	YY1	Transcriptional repressor protein YY1 OS	-0.243323	0.000991824	0.00183491	-0.186444	0.0126385	0.0304914
O00311	CDC7	Cell division cycle 7-related protein kinase OS	-0.228633	0.351839	0.526859	-0.0592779	0.00420206	0.0318838
P46778	RPL21	60S ribosomal protein L21 OS	0.103057	0.139025	0.484983	0.138937	0.0104685	0.0338859
Q7L014	DDX46	Probable ATP-dependent RNA helicase DDX46 OS	-0.219115	0.0036116	0.00741947	-0.277261	0.176423	0.269163
Q9NZC9	SMARCAL1	SWI/SNF-related matrix-associated actin-dependent regulator of chromatin subfamily A-like protein 1 OS	-1.08344	0.0701174	0.0291126	-0.204611	0.0315003	0.069031
P47756	CAPZB	F-actin-capping protein subunit beta OS	-0.143572	0.0119152	0.0373163	-0.0477229	0.802344	0.946576
O94916	NFAT5	Nuclear factor of activated T-cells 5 OS	-0.735662	0.038283	0.0234152	-0.134495	0.240574	0.574101
P62753	RPS6	40S ribosomal protein S6 OS	0.163703	0.203222	0.20555	0.203601	0.269007	0.227315
Q14257	RCN2	Reticulocalbin-2 OS	1.2931	0.333332	0.0044538	0.160446	0.38889	0.46978
P26373	RPL13	60S ribosomal protein L13 OS	0.243798	0.282971	0.183338	0.219714	0.107789	0.0266463
P20700	LMNB1	Lamin-B1 OS	0.134031	0.687054	0.685192	-0.239543	0.0785682	0.00241992
Q02543	RPL18A	60S ribosomal protein L18a OS	0.27839	0.14768	0.0326617	0.133951	0.284405	0.415699
Q03252	LMNB2	Lamin-B2 OS	0.0798688	0.757669	0.84653	-0.36197	0.121893	0.00954257
P18124	RPL7	60S ribosomal protein L7 OS	0.216494	0.263117	0.198396	0.278268	0.121973	0.0197406
P61247	RPS3A	40S ribosomal protein S3a OS	0.251511	0.148681	0.0429889	0.175196	0.512234	0.543048
O43242	PSMD3	26S proteasome non-ATPase regulatory subunit 3 OS	0.841985	0.151099	0.010565	0.232685	0.215639	0.202564
O95816	BAG2	BAG family molecular chaperone regulator 2 OS	-0.168353	0.42939	0.567129	0.252068	0.0710267	0.0254595
P30041	PRDX6	Peroxiredoxin-6 OS	0.401679	0.00955261	0.00018847	0.0937707	0.182125	0.466608
Q9Y678	COPG1	Coatomer subunit gamma-1 OS	0.176044	0.381901	0.508373	-0.160563	0.0450635	0.0252656
P40429	RPL13A	60S ribosomal protein L13a OS	0.29491	0.0994655	0.0358891	0.290741	0.077839	0.0230689
P62280	RPS11	40S ribosomal protein S11 OS	0.157325	0.193864	0.295057	0.389254	0.143513	0.0424461
P62913	RPL11	60S ribosomal protein L11 OS	0.197253	0.140643	0.135783	0.271822	0.119001	0.0583506
P25786	PSMA1	Proteasome subunit alpha type-1 OS	0.754528	0.0617822	0.00222742	0.152268	0.190628	0.300695
P25789	PSMA4	Proteasome subunit alpha type-4 OS	0.695497	0.31114	0.0607007	-0.05569	0.0782944	0.343141
Q9Y520	PRRC2C	Protein PRRC2C OS	0.271058	0.238543	0.187909	0.303865	0.11612	0.0453896
O75533	SF3B1	Splicing factor 3B subunit 1 OS	0.209523	0.05283	0.0205416	0.0547887	0.0497482	0.196688
Q96CS3	FAF2	FAS-associated factor 2 OS	0.826715	0.297912	0.0406637	0.198522	0.0461159	0.017516
P27635	RPL10	60S ribosomal protein L10 OS	0.120072	0.0975957	0.166794	0.326838	0.090332	0.0245294
O43933	PEX1	Peroxisome biogenesis factor 1 OS	1.19938	0.359298	0.0286351	0.138114	0.163878	0.281782
Q96K12	FAR2	Fatty acyl-CoA reductase 2 OS	1.44776	0.352962	0.0192428	0.241538	0.434709	0.437403
Q13608	PEX6	Peroxisome assembly factor 2 OS	1.28624	0.405746	0.0316057	0.140462	0.285245	0.483556
P62899	RPL31	60S ribosomal protein L31 OS	0.0605936	0.0985432	0.398422	0.355596	0.0942622	0.0226307
P18077	RPL35A	60S ribosomal protein L35a OS	0.048083	0.277651	0.792517	0.41534	0.0645421	0.00795339
P50570	DNM2	Dynamin-2 OS	0.232132	0.330102	0.347414	-0.0738952	0.145288	0.471273
Q29RF7	PDS5A	Sister chromatid cohesion protein PDS5 homolog A OS	0.452372	0.170662	0.0443121	-0.0282205	0.168125	0.798633
Q02878	RPL6	60S ribosomal protein L6 OS	0.0602875	0.281206	0.746037	0.27638	0.0458299	0.00904155
P07195	LDHB	L-lactate dehydrogenase B chain OS	0.953838	0.295759	0.0305856	0.112322	0.325321	0.610529
Q15046	KARS	Lysine--tRNA ligase OS	0.0249161	0.384467	0.920877	0.203683	0.199524	0.219064
Q9H4I3	TRABD	TraB domain-containing protein OS	-0.163897	0.331889	0.611891	-0.130214	0.0803987	0.262064
Q9NX63	CHCHD3	MICOS complex subunit MIC19 OS	0.0317434	0.113286	0.675403	0.344077	0.127544	0.0428783
P67870	CSNK2B	Casein kinase II subunit beta OS	0.673818	0.113333	0.00929855	0.158965	0.101797	0.113823
P35606	COPB2	Coatomer subunit beta&#039; OS	-0.0129165	0.215445	0.92677	0.0352362	0.334351	0.87199
Q9UBS4	DNAJB11	DnaJ homolog subfamily B member 11 OS	-0.771504	0.548702	0.135232	-0.602867	0.0655354	0.00391589
Q9Y4L1	HYOU1	Hypoxia up-regulated protein 1 OS	-0.0742858	0.353166	0.75053	-0.179169	0.403756	0.522481
Q96CN4	EVI5L	EVI5-like protein OS	0.408211	0.154276	0.0444594	-0.043005	0.136856	0.640824
P42695	NCAPD3	Condensin-2 complex subunit D3 OS	0.232376	0.0804144	0.037676	0.0859518	0.0765788	0.191335
Q9UNM6	PSMD13	26S proteasome non-ATPase regulatory subunit 13 OS	0.814661	0.211443	0.0217259	-0.087623	0.206333	0.538571
P55209	NAP1L1	Nucleosome assembly protein 1-like 1 OS	0.18415	0.0484681	0.022321	-0.0434788	0.144658	0.654548
Q93008	USP9X	Probable ubiquitin carboxyl-terminal hydrolase FAF-X OS	0.19998	0.143741	0.137555	-0.0209721	0.117412	0.78629
Q14671	PUM1	Pumilio homolog 1 OS	0.402599	0.0873743	0.0153397	0.0631737	0.175586	0.596765
P29597	TYK2	Non-receptor tyrosine-protein kinase TYK2 OS	0.525458	0.294207	0.090532	0.299955	0.525086	0.426739
P04406	GAPDH	Glyceraldehyde-3-phosphate dehydrogenase OS	1.09194	0.430679	0.048141	0.0501973	0.254839	0.765482
P35222	CTNNB1	Catenin beta-1 OS	0.740842	0.00947601	5.4531e-05	-0.0887304	0.245842	0.595699
P35221	CTNNA1	Catenin alpha-1 OS	0.571426	0.189928	0.0349078	0.0417583	0.144751	0.666863
P51149	RAB7A	Ras-related protein Rab-7a OS	0.692113	0.215485	0.0308254	-0.000408421	0.16246	0.996921
O00232	PSMD12	26S proteasome non-ATPase regulatory subunit 12 OS	0.83538	0.149716	0.0105376	0.173765	0.208254	0.285271
P05023	ATP1A1	Sodium/potassium-transporting ATPase subunit alpha-1 OS	1.44386	0.184985	0.00542696	0.0266619	0.149487	0.786591
Q9P2R7	SUCLA2	Succinyl-CoA ligase [ADP-forming] subunit beta, mitochondrial OS	-0.204511	0.649615	0.640243	-0.327662	0.18861	0.0949748
Q9Y383	LUC7L2	Putative RNA-binding protein Luc7-like 2 OS	0.408868	0.31327	0.152227	0.291307	0.0453844	0.00799388
O95373	IPO7	Importin-7 OS	0.959513	0.414349	0.0569057	0.481555	0.239309	0.0733746
Q7Z6Z7	HUWE1	E3 ubiquitin-protein ligase HUWE1 OS	0.616255	0.424585	0.128442	-0.0434569	0.144769	0.654936
P25788	PSMA3	Proteasome subunit alpha type-3 OS	0.945037	0.0567975	0.00120187	0.133368	0.26931	0.481411
Q93074	MED12	Mediator of RNA polymerase II transcription subunit 12 OS	0.0763978	0.450242	0.79653	0.429133	0.184082	0.0562142
P62857	RPS28	40S ribosomal protein S28 OS	0.288593	0.18691	0.115993	0.0198643	0.209341	0.884561
P28066	PSMA5	Proteasome subunit alpha type-5 OS	0.806977	0.11711	0.00694706	0.121982	0.199815	0.401192
P57678	GEMIN4	Gem-associated protein 4 OS	0.573999	0.224097	0.0472367	0.0386178	0.197951	0.767609
Q9H0U3	MAGT1	Magnesium transporter protein 1 OS	0.104523	0.49626	0.750218	0.223522	0.328233	0.359499
Q8TCG1	KIAA1524	Protein CIP2A OS	0.439876	0.162631	0.0426691	0.129098	0.210188	0.398855
P14314	PRKCSH	Glucosidase 2 subunit beta OS	0.802037	0.309985	0.0463582	0.623736	0.245685	0.0480221
Q96DZ1	ERLEC1	Endoplasmic reticulum lectin 1 OS	-0.81682	0.0303134	0.0167022	-0.470341	0.0130899	0.0125266
Q9Y4A5	TRRAP	Transformation/transcription domain-associated protein OS	0.0579152	0.422965	0.834609	0.333338	0.0604155	0.0107731
P25054	APC	Adenomatous polyposis coli protein OS	0.97657	0.276502	0.0256965	-0.124786	0.296347	0.541647
O95757	HSPA4L	Heat shock 70 kDa protein 4L OS	-0.68356	0.461394	0.1242	-0.819302	0.207344	0.0206887
P55072	VCP	Transitional endoplasmic reticulum ATPase OS	0.775708	0.363975	0.0661853	0.312771	0.18655	0.100944
Q9Y285	FARSA	Phenylalanine--tRNA ligase alpha subunit OS	-0.116519	0.171328	0.359994	-0.202285	0.0578494	0.026195
P35998	PSMC2	26S protease regulatory subunit 7 OS	0.626594	0.273829	0.0581613	0.0723249	0.108549	0.36776
Q9ULG6	CCPG1	Cell cycle progression protein 1 OS	1.03779	0.364615	0.0387687	0.404591	0.571527	0.34492
O95347	SMC2	Structural maintenance of chromosomes protein 2 OS	0.312693	0.318932	0.231573	0.181601	0.05399	0.0282212
O00468	AGRN	Agrin OS	1.48213	0.355164	0.0186083	-0.0648673	0.0973689	0.36781
Q13310	PABPC4	Polyadenylate-binding protein 4 OS	0.238864	0.0910754	0.0451993	0.215192	0.21107	0.219457
P04899	GNAI2	Guanine nucleotide-binding protein G(i) subunit alpha-2 OS	1.47972	0.236208	0.00838722	-0.198353	0.332168	0.409676
P62829	RPL23	60S ribosomal protein L23 OS	-0.147004	0.0661837	0.0614075	-0.0445056	0.0529132	0.282474
Q99848	EBNA1BP2	Probable rRNA-processing protein EBP2 OS	-0.022572	0.12551	0.784896	0.0159266	0.114689	0.83233
P62241	RPS8	40S ribosomal protein S8 OS	0.133654	0.0471819	0.0391188	0.35233	0.132609	0.0441185
Q13895	BYSL	Bystin OS	-0.0301967	0.301315	0.878175	0.172122	0.0684099	0.0488307
P62633	CNBP	Cellular nucleic acid-binding protein OS	0.414872	0.0676247	0.00874055	0.180213	0.0706386	0.0475881
P51148	RAB5C	Ras-related protein Rab-5C OS	0.809845	0.0970553	0.00475344	0.0324069	0.297765	0.867875
P11940	PABPC1	Polyadenylate-binding protein 1 OS	0.297193	0.0099767	0.000375433	0.286754	0.131646	0.0636236
P27824	CANX	Calnexin OS	-0.476189	0.0937309	0.0126698	-0.35103	0.0843779	0.0187205
Q8WVX9	FAR1	Fatty acyl-CoA reductase 1 OS	0.364856	0.332344	0.197595	0.265954	0.205929	0.154755
Q7KZF4	SND1	Staphylococcal nuclease domain-containing protein 1 OS	0.20981	0.274769	0.316955	0.138488	0.195019	0.343753
P28070	PSMB4	Proteasome subunit beta type-4 OS	0.865395	0.366603	0.0549365	0.0448738	0.0708951	0.387322
Q9Y5Q9	GTF3C3	General transcription factor 3C polypeptide 3 OS	0.73038	0.310013	0.0551342	0.0186743	0.0729887	0.700983
Q96S55	WRNIP1	ATPase WRNIP1 OS	1.02267	0.553426	0.0853111	-0.105663	0.127435	0.287477
Q9BTV4	TMEM43	Transmembrane protein 43 OS	0.637316	0.456684	0.136878	0.13694	0.23662	0.421727
Q9BQ39	DDX50	ATP-dependent RNA helicase DDX50 OS	0.220083	0.260332	0.280707	0.308038	0.0625535	0.0134688
Q86VM9	ZC3H18	Zinc finger CCCH domain-containing protein 18 OS	0.490139	0.288152	0.0984826	0.222116	0.224589	0.228849
Q9Y6B6	SAR1B	GTP-binding protein SAR1b OS	0.262438	0.0713984	0.0237949	-0.192769	0.187616	0.2171
P49368	CCT3	T-complex protein 1 subunit gamma OS	0.101661	0.196858	0.465464	-0.0876548	0.210809	0.546203
Q9H223	EHD4	EH domain-containing protein 4 OS	0.672966	0.122171	0.010808	0.13631	0.118644	0.184878
O60716	CTNND1	Catenin delta-1 OS	0.618457	0.407744	0.119473	-0.0130046	0.110161	0.856906
Q15233	NONO	Non-POU domain-containing octamer-binding protein OS	0.0657625	0.378802	0.792025	0.444207	0.177299	0.0492157
Q14974	KPNB1	Importin subunit beta-1 OS	0.937728	0.291716	0.0307771	0.38474	0.253457	0.119318
P26599	PTBP1	Polypyrimidine tract-binding protein 1 OS	-0.0298501	0.307187	0.881822	-0.0380311	0.199956	0.773131
Q14697	GANAB	Neutral alpha-glucosidase AB OS	0.634189	0.293018	0.0643648	0.624017	0.186922	0.0286309
O95793	STAU1	Double-stranded RNA-binding protein Staufen homolog 1 OS	0.222392	0.249373	0.262437	0.371295	0.126609	0.0366419
P08754	GNAI3	Guanine nucleotide-binding protein G(k) subunit alpha OS	1.41134	0.33617	0.0183918	-0.0478832	0.0932749	0.467732
Q9NU22	MDN1	Midasin OS	0.195756	0.300197	0.37595	0.156968	0.0616956	0.0478305
Q96HY6	DDRGK1	DDRGK domain-containing protein 1 OS	0.350861	0.467464	0.481027	-0.00483697	0.0197131	0.787368
Q9UBV2	SEL1L	Protein sel-1 homolog 1 OS	-1.05523	0.224329	0.0147326	-0.671835	0.197422	0.0275977
Q8NBM4	UBAC2	Ubiquitin-associated domain-containing protein 2 OS	0.772649	0.142055	0.0110806	0.0934806	0.174565	0.451573
P60900	PSMA6	Proteasome subunit alpha type-6 OS	0.903084	0.349645	0.0465083	0.136533	0.390003	0.605934
Q92974	ARHGEF2	Rho guanine nucleotide exchange factor 2 OS	0.10319	0.524535	0.765764	0.0612288	0.012767	0.0141849
Q9NXR1	NDE1	Nuclear distribution protein nudE homolog 1 OS	-0.128232	0.0779352	0.258399	0.534104	0.0440082	0.0370495
P78347	GTF2I	General transcription factor II-I OS	0.923331	0.0994092	0.0483723	-0.0617995	0.240403	0.778016
Q9Y2U8	LEMD3	Inner nuclear membrane protein Man1 OS	-0.617406	0.145949	0.105438	-0.113096	0.0047606	0.0189432
P35244	RPA3	Replication protein A 14 kDa subunit OS	-1.05398	0.267825	0.113181	-0.0275975	0.413794	0.940132
Q9UGP8	SEC63	Translocation protein SEC63 homolog OS	0.0802959	0.00390108	0.0218618	-0.209265	0.133057	0.268985
P61619	SEC61A1	Protein transport protein Sec61 subunit alpha isoform 1 OS	0.155067	0.0011473	0.00333055	-0.17433	0.00857035	0.0221216
P31260	HOXA10	Homeobox protein Hox-A10 OS	-0.795575	0.386467	0.210635	-0.167434	0.316097	0.590701
P51608	MECP2	Methyl-CpG-binding protein 2 OS	-1.4363	0.218084	0.0680897	-0.0431933	0.261398	0.853855
Q01813	PFKP	6-phosphofructokinase type C OS	-0.0167259	0.476733	0.968439	-0.3943	0.00171488	0.00195781
O60814	HIST1H2BK	Histone H2B type 1-K OS	-1.01009	0.0125669	0.00560043	-0.343552	0.46461	0.485772
O75398	DEAF1	Deformed epidermal autoregulatory factor 1 homolog OS	-1.07082	0.149318	0.0625691	-0.453726	0.390785	0.348246
Q9BSD7	NTPCR	Cancer-related nucleoside-triphosphatase OS	-0.417759	0.188363	0.196485	-0.103787	0.152535	0.512245
Q99459	CDC5L	Cell division cycle 5-like protein OS	0.170909	0.117395	0.287845	0.199935	0.0137535	0.0309419
Q14919	DRAP1	Dr1-associated corepressor OS	-0.864746	0.0701032	0.0364535	-0.108995	0.343746	0.73164
Q12772	SREBF2	Sterol regulatory element-binding protein 2 OS	-1.30447	0.183846	0.0632346	-0.567273	0.176551	0.137904
Q9Y3I0	RTCB	tRNA-splicing ligase RtcB homolog OS	-0.414957	0.327971	0.324443	0.0106018	0.165589	0.942514
Q13761	RUNX3	Runt-related transcription factor 3 OS	-0.697279	0.0749145	0.0482715	-0.30741	0.0835826	0.120919
Q6ZU65	UBN2	Ubinuclein-2 OS	-0.67504	0.0235943	0.015731	-0.237867	0.437696	0.58284
Q9NPJ6	MED4	Mediator of RNA polymerase II transcription subunit 4 OS	-0.282131	0.0096228	0.0153508	0.428616	0.154622	0.159003
P51153	RAB13	Ras-related protein Rab-13 OS	0.915875	0.0661059	0.0324633	-0.0636432	0.053408	0.340938
Q9P2D1	CHD7	Chromodomain-helicase-DNA-binding protein 7 OS	-0.696116	0.0528529	0.0341457	-0.176439	0.272766	0.528312
Q13952	NFYC	Nuclear transcription factor Y subunit gamma OS	-0.549333	0.0436897	0.0357644	-0.088129	0.124049	0.498505
Q9NXW2	DNAJB12	DnaJ homolog subfamily B member 12 OS	0.12076	0.418121	0.75314	0.22182	0.0973227	0.191511
P32969	RPL9	60S ribosomal protein L9 OS	0.139342	0.195089	0.496802	0.36395	0.0849211	0.104098
Q9Y3B4	SF3B14	Pre-mRNA branch site protein p14 OS	0.149763	0.185552	0.458012	0.18792	0.219283	0.439186
Q99496	RNF2	E3 ubiquitin-protein ligase RING2 OS	-0.31255	0.0748927	0.106851	-0.16965	0.188471	0.423907
Q9UN37	VPS4A	Vacuolar protein sorting-associated protein 4A OS	-0.216428	0.244466	0.429054	0.0191321	0.103717	0.837545
P30050	RPL12	60S ribosomal protein L12 OS	0.30529	0.0677698	0.0991197	0.376263	0.00408597	0.00488832
Q9NQB0	TCF7L2	Transcription factor 7-like 2 OS	-0.933475	0.189277	0.0906591	-0.199733	0.353134	0.570494
Q92769	HDAC2	Histone deacetylase 2 OS	-0.599307	0.171912	0.1274	-0.119261	0.0392493	0.145558
Q71SY5	MED25	Mediator of RNA polymerase II transcription subunit 25 OS	-0.65063	0.345021	0.228384	0.229884	0.0209794	0.0410249
O14818	PSMA7	Proteasome subunit alpha type-7 OS	0.809504	0.242041	0.132644	0.245272	0.102071	0.182193
Q9NX58	LYAR	Cell growth-regulating nucleolar protein OS	-0.204109	0.0128914	0.0284128	0.210094	0.0465826	0.0990042
Q9Y679	AUP1	Ancient ubiquitous protein 1 OS	0.0411536	0.304219	0.879662	-0.225228	0.113404	0.217748
Q15911	ZFHX3	Zinc finger homeobox protein 3 OS	-0.887758	0.154147	0.0777744	-0.253528	0.380152	0.518617
P05549	TFAP2A	Transcription factor AP-2-alpha OS	-1.40694	0.0814724	0.0260529	-0.403341	0.286589	0.296402
Q9HDC5	JPH1	Junctophilin-1 OS	0.436503	0.0195541	0.0201591	-0.0305688	0.0185334	0.257835
P31271	HOXA13	Homeobox protein Hox-A13 OS	-1.03829	0.072737	0.0315099	-0.366871	0.228253	0.263848
P14866	HNRNPL	Heterogeneous nuclear ribonucleoprotein L OS	-0.862104	0.338757	0.172534	-0.0212392	0.338951	0.943732
Q5T5X7	BEND3	BEN domain-containing protein 3 OS	-1.09939	0.0108702	0.00445085	-0.569321	0.143117	0.111992
Q9NVH1	DNAJC11	DnaJ homolog subfamily C member 11 OS	-0.2927	0.0136104	0.0209246	0.244775	0.0401709	0.073548
Q8WV44	TRIM41	E3 ubiquitin-protein ligase TRIM41 OS	0.843548	0.0262272	0.0139939	-0.235187	0.382496	0.544343
P20719	HOXA5	Homeobox protein Hox-A5 OS	-0.996693	0.513534	0.222423	-0.290124	0.28883	0.390486
P31689	DNAJA1	DnaJ homolog subfamily A member 1 OS	-0.205976	0.128756	0.264957	-0.0656449	0.0110439	0.0753791
P31350	RRM2	Ribonucleoside-diphosphate reductase subunit M2 OS	-0.264168	0.295324	0.425851	-0.301203	0.0741294	0.10969
P08107	HSPA1A	Heat shock 70 kDa protein 1A/1B OS	-0.371286	0.0247936	0.0300382	0.115776	0.00378857	0.014728
Q9Y3D7	PAM16	Mitochondrial import inner membrane translocase subunit TIM16 OS	0.074455	0.378696	0.827351	-0.147195	0.0813255	0.237106
O75132	ZBED4	Zinc finger BED domain-containing protein 4 OS	-0.284124	0.111364	0.172122	-0.300638	0.0672987	0.09994
Q15293	RCN1	Reticulocalbin-1 OS	0.431563	0.277394	0.271577	1.20948	0.0280768	0.010449
P09601	HMOX1	Heme oxygenase 1 OS	0.00839616	0.327752	0.976946	-0.249451	0.257188	0.401038
A6NL28	5	Putative tropomyosin alpha-3 chain-like protein OS	-0.851787	0.0472596	0.0249633	-0.22359	1.33995	0.852468
P51532	SMARCA4	Transcription activator BRG1 OS	-0.029013	0.361033	0.927959	-0.160844	0.148484	0.368169
P53007	SLC25A1	Tricarboxylate transport protein, mitochondrial OS	-0.0118735	0.161987	0.934242	-0.0486646	0.0402994	0.337238
Q13243	SRSF5	Serine/arginine-rich splicing factor 5 OS	0.183146	0.225701	0.456322	0.384797	0.0227399	0.026587
P36578	RPL4	60S ribosomal protein L4 OS	0.160257	0.118001	0.305602	0.343007	0.026317	0.0345043
contaminant_S68241		owl|S68241| immunoglobulin light chain (Mab13-1) - mouse (fragment)	0.691399	0.495473	0.0188771	0.126779	0.168078	0.123929
Q71U36	TUBA1A	Tubulin alpha-1A chain OS	-0.0349925	0.644122	0.899327	-0.319716	0.34262	0.0710262
contaminant_SPG2_STRSP		owl|P19909| IMMUNOGLOBULIN G BINDING PROTEIN G PRECURSOR (PROTEIN G). - STREPTOCOCCUS...	1.3023	1.06269	0.333171	0.170725	0.453141	0.688338
P19474	TRIM21	E3 ubiquitin-protein ligase TRIM21 OS	0.595559	0.116595	0.00199923	0.060674	0.159059	0.50102
P01617	1	Ig kappa chain V-II region TEW OS	0.977399	0.674807	0.289126	0.33194	0.121671	0.16145
Q99623	PHB2	Prohibitin-2 OS	0.325733	0.444761	0.132788	-0.0351424	0.354725	0.817902
P13646	KRT13	Keratin, type I cytoskeletal 13 OS	0.921268	0.647071	0.0334198	0.0609621	0.726193	0.86024
P35232	PHB	Prohibitin OS	0.341782	0.650896	0.181074	-0.0362297	0.421244	0.814777
P62258	YWHAE	14-3-3 protein epsilon OS	0.504615	0.353355	0.0331131	-0.0557266	0.248177	0.641981
Q5BJH7	YIF1B	Protein YIF1B OS	0.154874	0.394221	0.677155	0.0976222	0.180171	0.58376
P18621	RPL17	60S ribosomal protein L17 OS	0.165408	0.0442616	0.0230464	0.364176	0.2999	0.170148
P20073	ANXA7	Annexin A7 OS	0.414921	0.453271	0.253731	-0.108648	0.260173	0.544648
Q9HBM6	TAF9B	Transcription initiation factor TFIID subunit 9B OS	-0.180108	0.0309266	0.0769209	0.129457	4.29893e-05	0.000149486
Q14145	KEAP1	Kelch-like ECH-associated protein 1 OS	0.934411	0.524883	0.0910434	0.177454	0.0603367	0.0364429
Q13409	DYNC1I2	Cytoplasmic dynein 1 intermediate chain 2 OS	-0.0668464	0.186867	0.701838	0.0174276	0.00494592	0.126079
Q9GZR7	DDX24	ATP-dependent RNA helicase DDX24 OS	0.872343	0.213965	0.109326	0.252175	0.0568486	0.100634
O75122	CLASP2	CLIP-associating protein 2 OS	0.319245	0.421274	0.477975	0.202896	0.0191612	0.0424493
Q15365	PCBP1	Poly(rC)-binding protein 1 OS	0.259036	0.336601	0.314118	-0.105383	0.103	0.218382
O60264	SMARCA5	SWI/SNF-related matrix-associated actin-dependent regulator of chromatin subfamily A member 5 OS	0.0438782	0.550019	0.928479	0.19554	0.136375	0.291673
P35241	RDX	Radixin OS	1.3706	0.517327	0.044353	-0.141533	0.232739	0.402678
P62195	PSMC5	26S protease regulatory subunit 8 OS	0.569387	0.0855925	0.00744838	0.102418	0.222786	0.509386
Q9NR30	DDX21	Nucleolar RNA helicase 2 OS	0.198678	0.270732	0.331535	0.410338	0.0977149	0.0183828
P61086	UBE2K	Ubiquitin-conjugating enzyme E2 K OS	-0.29219	0.203782	0.291672	-0.0153441	0.235836	0.941587
P37268	FDFT1	Squalene synthase OS	0.569227	0.554751	0.217505	0.13934	0.345688	0.557334
P49721	PSMB2	Proteasome subunit beta type-2 OS	0.623997	0.195578	0.0312204	0.0720287	0.0917222	0.3068
Q86X29	LSR	Lipolysis-stimulated lipoprotein receptor OS	1.46303	0.51132	0.154238	-0.216576	0.325142	0.519007
O43491	EPB41L2	Band 4.1-like protein 2 OS	1.36469	0.467513	0.1513	0.136904	0.153417	0.42659
Q9P258	RCC2	Protein RCC2 OS	0.515579	0.0162127	0.0141531	0.393749	0.101169	0.114415
P46459	NSF	Vesicle-fusing ATPase OS	0.220651	0.22408	0.23021	-0.113059	0.0265023	0.0178277
P10321	HLA-C	HLA class I histocompatibility antigen, Cw-7 alpha chain OS	0.590568	0.0344288	0.0262284	-0.0456743	0.0554	0.451321
P10644	PRKAR1A	cAMP-dependent protein kinase type I-alpha regulatory subunit OS	0.211757	0.225268	0.41057	0.112911	0.200609	0.572009
Q14498	RBM39	RNA-binding protein 39 OS	0.247205	0.577166	0.535466	0.260242	0.0987693	0.0448112
Q9NVC6	MED17	Mediator of RNA polymerase II transcription subunit 17 OS	0.0212468	0.275899	0.930939	0.261139	0.0379477	0.0651866
Q7Z2W4	ZC3HAV1	Zinc finger CCCH-type antiviral protein 1 OS	0.253169	0.235526	0.203683	0.0310009	0.0769917	0.55771
P30154	PPP2R1B	Serine/threonine-protein phosphatase 2A 65 kDa regulatory subunit A beta isoform OS	0.336431	0.0214078	0.0286252	0.148665	0.0974772	0.276381
P55036	PSMD4	26S proteasome non-ATPase regulatory subunit 4 OS	0.521098	0.370642	0.13525	-0.0398341	0.134253	0.658459
Q15006	EMC2	ER membrane protein complex subunit 2 OS	0.241954	0.569419	0.53836	0.171444	0.156038	0.19736
P60842	EIF4A1	Eukaryotic initiation factor 4A-I OS	0.220287	0.293858	0.323696	0.0887822	0.271417	0.628112
O00231	PSMD11	26S proteasome non-ATPase regulatory subunit 11 OS	0.792319	0.327575	0.0525282	0.220672	0.125101	0.0925039
Q9NYF8	BCLAF1	Bcl-2-associated transcription factor 1 OS	0.276831	0.13709	0.0729171	0.287036	0.0927876	0.0331121
P98175	RBM10	RNA-binding protein 10 OS	0.319791	0.0673589	0.0144687	0.253923	0.109724	0.0569739
O15498	YKT6	Synaptobrevin homolog YKT6 OS	0.31488	0.358265	0.267361	-0.00042387	0.0400116	0.987027
P04637	TP53	Cellular tumor antigen p53 OS	0.641319	0.168146	0.0221555	0.0372874	0.128119	0.664246
P02786	TFRC	Transferrin receptor protein 1 OS	0.444001	0.0948711	0.0148799	-0.06138	0.449118	0.834914
P55884	EIF3B	Eukaryotic translation initiation factor 3 subunit B OS	-0.102251	0.140698	0.335144	-0.299739	0.234507	0.157271
P40938	RFC3	Replication factor C subunit 3 OS	0.587284	0.304192	0.0789796	0.111321	0.215438	0.465239
Q9UQ35	SRRM2	Serine/arginine repetitive matrix protein 2 OS	0.343429	0.390667	0.267292	0.0930751	0.0334997	0.0405713
Q9Y277	VDAC3	Voltage-dependent anion-selective channel protein 3 OS	0.183829	0.337553	0.582196	0.0555225	0.25207	0.807756
P61421	ATP6V0D1	V-type proton ATPase subunit d 1 OS	0.173838	0.693443	0.706493	-0.370845	0.109238	0.0277258
O76094	SRP72	Signal recognition particle subunit SRP72 OS	0.0824678	0.376745	0.808881	0.0590735	0.095698	0.543107
Q9UKN8	GTF3C4	General transcription factor 3C polypeptide 4 OS	0.842712	0.0475406	0.00105915	0.139031	0.201303	0.354181
Q99436	PSMB7	Proteasome subunit beta type-7 OS	1.05473	0.280911	0.0228379	0.235781	0.356751	0.370837
P32119	PRDX2	Peroxiredoxin-2 OS	0.516687	0.361614	0.131762	0.0140662	0.22872	0.924891
Q8IZ69	TRMT2A	tRNA (uracil-5-)-methyltransferase homolog A OS	0.19306	0.31764	0.547991	0.136091	0.250306	0.582702
Q8WUD1	RAB2B	Ras-related protein Rab-2B OS	0.526231	0.0390103	0.0333404	0.0816127	0.312308	0.774639
P11047	LAMC1	Laminin subunit gamma-1 OS	1.0735	0.11845	0.0495699	-0.0753673	0.0963702	0.467984
Q9P2J5	LARS	Leucine--tRNA ligase, cytoplasmic OS	0.301345	0.492278	0.545747	0.438023	0.379593	0.349992
P43304	GPD2	Glycerol-3-phosphate dehydrogenase, mitochondrial OS	0.0966246	0.213711	0.637832	0.0146709	0.285413	0.953803
Q15208	STK38	Serine/threonine-protein kinase 38 OS	0.580065	0.0953643	0.00888945	-0.000757364	0.0268314	0.96545
Q07020	RPL18	60S ribosomal protein L18 OS	0.375485	0.0911869	0.108265	0.23862	0.0185102	0.0348847
Q9Y3F4	STRAP	Serine-threonine kinase receptor-associated protein OS	0.467502	0.288927	0.107227	0.269698	0.113424	0.0542079
P17980	PSMC3	26S protease regulatory subunit 6A OS	0.725887	0.224526	0.0304426	-0.00759183	0.350386	0.973473
Q96JB5	CDK5RAP3	CDK5 regulatory subunit-associated protein 3 OS	0.21582	0.31061	0.351917	0.000365181	0.133733	0.996656
P22061	PCMT1	Protein-L-isoaspartate(D-aspartate) O-methyltransferase OS	0.412149	0.0423813	0.00350616	-0.0297536	0.0517635	0.424355
Q16875	PFKFB3	6-phosphofructo-2-kinase/fructose-2,6-bisphosphatase 3 OS	0.448121	0.157737	0.0389063	0.0722133	0.124637	0.421294
Q9BW92	TARS2	Threonine--tRNA ligase, mitochondrial OS	0.0910942	0.474823	0.831336	-0.00591769	0.144459	0.96316
Q9Y2X0	MED16	Mediator of RNA polymerase II transcription subunit 16 OS	-0.0351522	0.386685	0.918602	0.409787	0.0752354	0.0821877
Q14152	EIF3A	Eukaryotic translation initiation factor 3 subunit A OS	-0.0381094	0.23554	0.805621	-0.121691	0.0568424	0.0656482
Q9Y263	PLAA	Phospholipase A-2-activating protein OS	-0.298565	0.252271	0.342854	-0.00995642	0.000485835	0.0219573
Q16891	IMMT	MICOS complex subunit MIC60 OS	-0.025925	0.0196489	0.149654	0.187642	0.035704	0.0118543
Q13610	PWP1	Periodic tryptophan protein 1 homolog OS	0.631306	0.488408	0.318677	0.27211	0.00787079	0.013019
P43686	PSMC4	26S protease regulatory subunit 6B OS	1.00545	0.43189	0.0563554	0.262633	0.0924123	0.0388794
Q12907	LMAN2	Vesicular integral-membrane protein VIP36 OS	1.18676	0.178467	0.00745399	0.843845	0.324898	0.0460287
Q969Q0	RPL36AL	60S ribosomal protein L36a-like OS	-0.0341028	0.0838157	0.667593	0.256209	0.0218131	0.0382793
Q9P035	HACD3	Very-long-chain (3R)-3-hydroxyacyl-CoA dehydratase 3 OS	0.855039	0.192927	0.0165502	0.153563	0.270593	0.42927
P61923	COPZ1	Coatomer subunit zeta-1 OS	0.0546937	0.296488	0.837538	-0.0968632	0.0201786	0.0931078
P19367	HK1	Hexokinase-1 OS	0.227721	0.402669	0.430611	0.0604787	0.273319	0.73843
Q12789	GTF3C1	General transcription factor 3C polypeptide 1 OS	0.821581	0.281975	0.0370935	-0.026255	0.144923	0.783387
Q99832	CCT7	T-complex protein 1 subunit eta OS	0.0505705	0.349429	0.825471	-0.0807891	0.147291	0.442369
P05387	RPLP2	60S acidic ribosomal protein P2 OS	0.295896	0.0714934	0.107726	0.546829	0.0471962	0.0388045
Q96AC1	FERMT2	Fermitin family homolog 2 OS	0.532544	0.33054	0.263289	0.0211647	0.114747	0.83756
Q9BXW9	FANCD2	Fanconi anemia group D2 protein OS	0.562542	0.0209078	0.016727	0.145349	0.0675866	0.202232
P23588	EIF4B	Eukaryotic translation initiation factor 4B OS	0.559437	0.00504635	0.00406056	-0.0210243	0.0628863	0.718834
P20340	RAB6A	Ras-related protein Rab-6A OS	0.348303	0.239366	0.287971	0.00771781	0.111248	0.93774
Q6NT76	HMBOX1	Homeobox-containing protein 1 OS	-1.00725	0.103785	0.0463017	-0.0881893	0.379502	0.797862
Q16513	PKN2	Serine/threonine-protein kinase N2 OS	0.482839	0.0719974	0.0668771	-0.123899	0.0112041	0.0406522
Q15776	ZKSCAN8	Zinc finger protein with KRAB and SCAN domains 8 OS	0.075608	0.178913	0.657063	-0.0731862	0.0560668	0.316051
Q8WUA4	GTF3C2	General transcription factor 3C polypeptide 2 OS	0.775068	0.100876	0.0584239	0.127977	0.0841607	0.277099
P29992	GNA11	Guanine nucleotide-binding protein subunit alpha-11 OS	0.564743	0.0385377	0.0306947	-0.0275892	0.0303728	0.4211
Q9Y5Q8	GTF3C5	General transcription factor 3C polypeptide 5 OS	0.427344	0.0728781	0.0763998	-0.0625497	0.0347835	0.238507
contaminant_S68241 owl		S68241 immunoglobulin light chain (Mab13-1) - mouse (fragment)	0.558382	0.0217339	0.0175171	0.26753	0.0677507	0.112805
Q9H2P0	ADNP	Activity-dependent neuroprotector homeobox protein OS	-0.358841	0.394937	0.421015	0.0373441	0.0497402	0.480933
Q96AG4	LRRC59	Leucine-rich repeat-containing protein 59 OS	0.378237	0.0240007	0.0285453	0.12971	0.269414	0.619444
Q15814	TBCC	Tubulin-specific chaperone C OS	0.0621435	0.000631815	0.00457669	-0.283274	0.410912	0.508081
P57088	TMEM33	Transmembrane protein 33 OS	-0.174618	0.315572	0.577283	-0.20018	0.0109697	0.0246559
Q9NQC3	RTN4	Reticulon-4 OS	0.695125	0.400847	0.246483	-0.260497	0.32448	0.459702
O75688	PPM1B	Protein phosphatase 1B OS	0.422463	0.00634581	0.00676156	0.165957	0.414865	0.672246
Q9Y5T5	USP16	Ubiquitin carboxyl-terminal hydrolase 16 OS	-0.44185	0.454801	0.400537	-0.231914	0.283385	0.453649
Q49A26	GLYR1	Putative oxidoreductase GLYR1 OS	-0.0431002	0.0645454	0.518219	0.0969382	0.148711	0.525867
Q9NUP9	LIN7C	Protein lin-7 homolog C OS	1.20131	0.173241	0.0646936	0.0132795	0.203789	0.941498
Q9NNW5	WDR6	WD repeat-containing protein 6 OS	0.236546	0.0175399	0.0333488	0.0207986	0.091142	0.801265
O95232	LUC7L3	Luc7-like protein 3 OS	0.252685	0.0133115	0.0237035	0.46012	0.271511	0.251651
Q8WVM8	SCFD1	Sec1 family domain-containing protein 1 OS	-0.28458	0.210487	0.306776	-0.0365933	0.105437	0.709524
P51572	BCAP31	B-cell receptor-associated protein 31 OS	0.255421	0.33712	0.478039	-0.295432	0.162335	0.235925
Q9NRG9	AAAS	Aladin OS	-0.40684	0.371964	0.365359	-0.0880231	0.0357211	0.177901
Q86YZ3	HRNR	Hornerin OS	-0.0608944	0.727759	0.925016	-0.791494	0.47515	0.255564
O60244	MED14	Mediator of RNA polymerase II transcription subunit 14 OS	-0.33262	0.00767271	0.0103831	-0.00786552	0.492921	0.985636
P56182	RRP1	Ribosomal RNA processing protein 1 homolog A OS	0.414341	0.160844	0.170547	0.104274	0.0108426	0.0467241
Q8N257	HIST3H2BB	Histone H2B type 3-B OS	-0.663862	0.017209	0.0116679	-0.276262	0.321868	0.4387
contaminant_A45063 owl		A45063 immunoglobulin binding protein LG - Peptostreptococcus magnus	0.822539	0.244131	0.131696	0.561484	0.0284374	0.0227894
P36956	SREBF1	Sterol regulatory element-binding protein 1 OS	-1.20542	0.119683	0.0446218	-0.286066	0.0777235	0.120835
O95470	SGPL1	Sphingosine-1-phosphate lyase 1 OS	0.206437	0.109675	0.228774	0.000576869	0.0357064	0.985457
Q6ZNB6	NFXL1	NF-X1-type zinc finger protein NFXL1 OS	0.341527	0.377521	0.422358	0.358583	0.114292	0.141123
Q9BVQ7	SPATA5L1	Spermatogenesis-associated protein 5-like protein 1 OS	-0.0401533	0.31474	0.886363	-0.0464981	0.0686079	0.5135
P20020	ATP2B1	Plasma membrane calcium-transporting ATPase 1 OS	0.772146	0.741652	0.379818	-0.115485	0.178986	0.529114
P11142	HSPA8	Heat shock cognate 71 kDa protein OS	-0.0131875	0.302924	0.91206	-0.0269403	0.224077	0.761194
O14654	IRS4	Insulin receptor substrate 4 OS	0.241138	0.462295	0.373513	0.0920311	0.101102	0.166229
Q04837	SSBP1	Single-stranded DNA-binding protein, mitochondrial OS	1.08756	2.06581	0.25363	-0.0426134	0.408934	0.808696
P0DMV9	HSPA1B	Heat shock 70 kDa protein 1B OS	0.110591	0.234149	0.350476	-0.0163002	0.302329	0.909854
P23396	RPS3	40S ribosomal protein S3 OS	0.00657362	0.33931	0.957832	0.0599515	0.226688	0.478817
P00367	GLUD1	Glutamate dehydrogenase 1, mitochondrial OS	-0.269585	0.35275	0.223859	-0.0591949	0.243552	0.660193
P67936	TPM4	Tropomyosin alpha-4 chain OS	0.334373	1.19478	0.614741	-0.0337405	0.898539	0.944862
P62263	RPS14	40S ribosomal protein S14 OS	0.000661746	0.295425	0.996707	-0.135593	0.163873	0.196528
P62269	RPS18	40S ribosomal protein S18 OS	0.280001	0.425067	0.279272	0.111523	0.252038	0.44135
P35268	RPL22	60S ribosomal protein L22 OS	-0.0362089	0.379115	0.860708	-0.36737	0.626613	0.32561
Q96HS1	PGAM5	Serine/threonine-protein phosphatase PGAM5, mitochondrial OS	-0.0717383	0.230406	0.577601	0.292798	0.307588	0.153052
P61981	YWHAG	14-3-3 protein gamma OS	0.393708	0.408665	0.149635	-0.0628322	0.292159	0.696132
P55060	CSE1L	Exportin-2 OS	0.538567	0.501712	0.12106	0.00270919	0.190743	0.979122
P25705	ATP5A1	ATP synthase subunit alpha, mitochondrial OS	0.0581616	0.356399	0.765577	-0.0976663	0.494614	0.719306
O75955	FLOT1	Flotillin-1 OS	0.186707	0.516188	0.521732	-0.495769	0.517726	0.151353
Q9Y230	RUVBL2	RuvB-like 2 OS	0.131101	0.375883	0.535653	-0.0116081	0.240403	0.929156
P62888	RPL30	60S ribosomal protein L30 OS	0.039728	0.306139	0.812009	-0.0371869	0.640053	0.914836
P35580	MYH10	Myosin-10 OS	0.454098	1.2734	0.527193	0.0810924	0.977614	0.878787
P20618	PSMB1	Proteasome subunit beta type-1 OS	0.991849	0.503541	0.07622	0.177791	0.177189	0.224354
O00767	SCD	Acyl-CoA desaturase OS	-0.151973	0.115594	0.150495	0.319126	0.253819	0.161328
P60866	RPS20	40S ribosomal protein S20 OS	-0.00432894	0.128624	0.958815	-0.104457	0.047534	0.0626133
Q96EY1	DNAJA3	DnaJ homolog subfamily A member 3, mitochondrial OS	-0.221812	0.340401	0.376226	-0.0529604	0.0836487	0.38722
P11586	MTHFD1	C-1-tetrahydrofolate synthase, cytoplasmic OS	0.169028	0.420106	0.557981	-0.0802824	0.238907	0.619409
Q13347	EIF3I	Eukaryotic translation initiation factor 3 subunit I OS	-0.0253451	0.202352	0.848371	-0.212143	0.239871	0.265247
Q7Z4H7	HAUS6	HAUS augmin-like complex subunit 6 OS	0.00965001	0.106929	0.89014	-0.145074	0.227803	0.384984
Q9Y295	DRG1	Developmentally-regulated GTP-binding protein 1 OS	0.0470842	0.412145	0.861433	-0.00484266	0.175267	0.966179
O76031	CLPX	ATP-dependent Clp protease ATP-binding subunit clpX-like, mitochondrial OS	0.105726	0.376751	0.674967	0.0322066	0.095142	0.61702
Q6IBW4	NCAPH2	Condensin-2 complex subunit H2 OS	0.236152	0.116638	0.0725747	0.113779	0.28784	0.564254
Q06787	FMR1	Fragile X mental retardation protein 1 OS	0.0812809	0.0968066	0.28309	0.119373	0.218625	0.444113
P46379	BAG6	Large proline-rich protein BAG6 OS	0.186155	0.281644	0.37081	-0.0470433	0.137055	0.612466
P63151	PPP2R2A	Serine/threonine-protein phosphatase 2A 55 kDa regulatory subunit B alpha isoform OS	0.0229283	0.108505	0.749453	0.165279	0.140477	0.178449
Q9UJZ1	STOML2	Stomatin-like protein 2, mitochondrial OS	-0.0567675	0.422317	0.837558	-0.308267	0.136111	0.0592662
Q9Y4W6	AFG3L2	AFG3-like protein 2 OS	0.142641	0.175851	0.295221	0.043741	0.217451	0.760791
P62249	RPS16	40S ribosomal protein S16 OS	0.0220987	0.0553381	0.560644	0.0818045	0.0643249	0.158506
Q8NHY2	RFWD2	E3 ubiquitin-protein ligase RFWD2 OS	-1.01902	0.578886	0.0928356	0.412598	0.643079	0.38214
Q9UL15	BAG5	BAG family molecular chaperone regulator 5 OS	-0.0450971	0.327628	0.833763	0.0584454	0.273682	0.746964
O43684	BUB3	Mitotic checkpoint protein BUB3 OS	0.228718	0.0325823	0.0639121	-0.0221987	0.113442	0.828124
Q9BZF1	OSBPL8	Oxysterol-binding protein-related protein 8 OS	1.1932	0.857379	0.137487	-0.235885	0.678441	0.608214
Q9HAV4	XPO5	Exportin-5 OS	0.365995	0.464709	0.305754	0.0045857	0.301088	0.98135
O75477	ERLIN1	Erlin-1 OS	0.092821	0.30102	0.646699	0.857921	0.514147	0.101769
P07814	EPRS	Bifunctional glutamate/proline--tRNA ligase OS	0.0495891	0.228942	0.743587	0.0822525	0.287304	0.669117
P62937	PPIA	Peptidyl-prolyl cis-trans isomerase A OS	1.15284	0.84746	0.142587	0.0567929	0.245838	0.72775
Q96N67	DOCK7	Dedicator of cytokinesis protein 7 OS	-0.253354	0.212177	0.34037	-0.250775	0.308387	0.455653
O94906	PRPF6	Pre-mRNA-processing factor 6 OS	0.0289679	0.152883	0.833326	-0.0340709	0.100733	0.715965
Q9UQ13	SHOC2	Leucine-rich repeat protein SHOC-2 OS	0.0256021	0.198592	0.885194	-0.0218315	0.226814	0.913871
P10589	NR2F1	COUP transcription factor 1 OS	-0.306164	0.0779741	0.113431	-0.0732905	0.27869	0.773324
P51617	IRAK1	Interleukin-1 receptor-associated kinase 1 OS	-0.290305	0.117261	0.177115	-0.124736	0.10404	0.339238
P62820	RAB1A	Ras-related protein Rab-1A OS	0.97281	0.253051	0.115802	-0.00471977	0.238227	0.982168
O95983	MBD3	Methyl-CpG-binding domain protein 3 OS	-0.505989	0.13626	0.119791	0.0114912	0.25566	0.959588
O43913	ORC5	Origin recognition complex subunit 5 OS	0.33084	0.426216	0.470357	0.0134592	0.0360949	0.691062
Q96PK6	RBM14	RNA-binding protein 14 OS	-0.607218	0.108821	0.0802464	0.0459057	0.140092	0.723737
P84022	SMAD3	Mothers against decapentaplegic homolog 3 OS	-0.825098	0.236148	0.127121	0.0305607	0.0527017	0.56273
Q9BVK6	TMED9	Transmembrane emp24 domain-containing protein 9 OS	-0.0341905	0.0476613	0.495416	0.332462	0.175993	0.228019
Q8NI60	ADCK3	Chaperone activity of bc1 complex-like, mitochondrial OS	-0.187884	0.248791	0.479076	-0.0482726	0.0825784	0.560216
Q9BUJ2	HNRNPUL1	Heterogeneous nuclear ribonucleoprotein U-like protein 1 OS	-0.694742	0.155805	0.10012	-0.158399	0.166334	0.406612
P04181	OAT	Ornithine aminotransferase, mitochondrial OS	-0.107039	0.101465	0.375924	-0.0104874	0.125767	0.92527
Q2M389	KIAA1033	WASH complex subunit 7 OS	0.103019	0.113491	0.42131	0.0693017	0.0427485	0.261841
O75691	UTP20	Small subunit processome component 20 homolog OS	0.455172	0.292076	0.271173	0.0222475	0.087271	0.779721
Q86WJ1	CHD1L	Chromodomain-helicase-DNA-binding protein 1-like OS	-0.474027	0.190199	0.175997	0.0483103	0.162387	0.746467
Q9NZI7	UBP1	Upstream-binding protein 1 OS	-0.716326	0.468815	0.275931	-0.0842532	0.039235	0.20251
Q96TA2	YME1L1	ATP-dependent zinc metalloprotease YME1L1 OS	-0.106943	0.020146	0.0843048	0.212807	0.252295	0.444151
P11388	TOP2A	DNA topoisomerase 2-alpha OS	-0.323823	0.166092	0.221498	0.0512359	0.0459247	0.359631
O43390	HNRNPR	Heterogeneous nuclear ribonucleoprotein R OS	-0.257589	0.0817247	0.140494	0.436462	0.459293	0.407253
contaminant_GR78_YEAST owl		P16474 78 KD GLUCOSE REGULATED PROTEIN HOMOLOG PRECURSOR (GRP 78) (IMMUNOGLOBULIN...	-0.00428268	0.238846	0.98386	0.145316	0.0177211	0.0547608
P04439	HLA-A	HLA class I histocompatibility antigen, A-3 alpha chain OS	1.5342	0.323934	0.0943501	0.0889172	0.137171	0.527642
O75494	SRSF10	Serine/arginine-rich splicing factor 10 OS	-0.15827	0.100143	0.267826	0.0333637	0.144954	0.799662
O60663	LMX1B	LIM homeobox transcription factor 1-beta OS	-0.474022	0.631261	0.480878	-0.281529	0.211873	0.311331
Q13505	MTX1	Metaxin-1 OS	-0.326269	0.0587771	0.0806613	-0.238172	0.464032	0.600282
Q9NWZ8	GEMIN8	Gem-associated protein 8 OS	0.69675	0.407351	0.249561	-0.0516661	0.199895	0.776903
P46777	RPL5	60S ribosomal protein L5 OS	0.19833	0.213126	0.413664	0.357387	0.111014	0.137645
Q9H4L7	SMARCAD1	SWI/SNF-related matrix-associated actin-dependent regulator of chromatin subfamily A containing DEAD/H box 1 OS	-0.103246	0.194409	0.589905	0.141661	0.204909	0.507179
Q96A65	EXOC4	Exocyst complex component 4 OS	0.440948	0.249496	0.242289	-0.0585777	0.250068	0.796347
O14981	BTAF1	TATA-binding protein-associated factor 172 OS	-0.209858	0.108064	0.222304	-0.091607	0.366505	0.783695
O60506	SYNCRIP	Heterogeneous nuclear ribonucleoprotein Q OS	-0.333758	0.106364	0.141103	0.305172	0.199116	0.27519
O43264	ZW10	Centromere/kinetochore protein zw10 homolog OS	0.203485	0.243926	0.447621	0.0281691	0.155312	0.840154
P0C2W1	FBXO45	F-box/SPRY domain-containing protein 1 OS	-0.604582	0.111213	0.0823447	-0.291875	0.204365	0.292668
Q9Y4R8	TELO2	Telomere length regulation protein TEL2 homolog OS	0.0272703	0.077348	0.705544	-0.0993108	0.0977165	0.386983
Q9UNY4	TTF2	Transcription termination factor 2 OS	-0.208018	0.0792429	0.167508	-0.0686143	0.198309	0.710298
P68371	TUBB4B	Tubulin beta-4B chain OS	0.19892	0.0536579	0.119987	-0.345597	0.225658	0.275367
P50402	EMD	Emerin OS	0.821308	1.5896	0.377441	-0.0957841	0.213787	0.436245
contaminant_GR78_MESAU		owl|P07823| 78 KD GLUCOSE REGULATED PROTEIN PRECURSOR (GRP 78) (IMMUNOGLOBULIN...	-0.16258	0.383336	0.458623	-0.402908	0.3277	0.0909483
P67809	YBX1	Nuclease-sensitive element-binding protein 1 OS	0.261697	0.216206	0.0941002	0.337346	0.561115	0.315453
P60709	ACTB	Actin, cytoplasmic 1 OS	-0.138441	1.09706	0.817047	-0.260551	1.05302	0.654669
P14625	HSP90B1	Endoplasmin OS	0.017592	0.319147	0.919177	-0.00324647	0.248317	0.980782
P27694	RPA1	Replication protein A 70 kDa DNA-binding subunit OS	0.531513	2.02397	0.635777	-0.209651	0.32049	0.281979
O95714	HERC2	E3 ubiquitin-protein ligase HERC2 OS	0.300764	1.37058	0.690431	-0.13508	0.226917	0.319444
P35579	MYH9	Myosin-9 OS	0.307748	1.46365	0.702411	0.0332436	1.09021	0.955206
Q8NC56	LEMD2	LEM domain-containing protein 2 OS	0.63675	1.16761	0.355176	-0.146716	0.233387	0.297627
P62851	RPS25	40S ribosomal protein S25 OS	-0.00497426	0.205396	0.970352	0.156317	0.321299	0.488124
P61978	HNRNPK	Heterogeneous nuclear ribonucleoprotein K OS	0.135967	0.45061	0.653358	0.108382	0.212024	0.469352
P06748	NPM1	Nucleophosmin OS	-0.0204335	0.379003	0.934113	0.193319	0.247888	0.3093
Q9BUF5	TUBB6	Tubulin beta-6 chain OS	-0.0865353	0.240145	0.596242	-0.0135317	0.135077	0.878221
Q9UHB9	SRP68	Signal recognition particle subunit SRP68 OS	0.42408	0.260419	0.106072	-0.0232782	0.122533	0.773382
P07910	HNRNPC	Heterogeneous nuclear ribonucleoproteins C1/C2 OS	-0.307787	0.583889	0.457611	0.0691513	0.522614	0.840031
O75190	DNAJB6	DnaJ homolog subfamily B member 6 OS	-0.218874	0.394643	0.438109	0.0305457	0.0611679	0.478242
Q9Y5Y2	NUBP2	Cytosolic Fe-S cluster assembly factor NUBP2 OS	0.0316786	0.643507	0.939817	-0.201502	0.229204	0.26727
Q12931	TRAP1	Heat shock protein 75 kDa, mitochondrial OS	0.0117862	0.421604	0.965781	-0.107166	0.11966	0.261015
Q9NP72	RAB18	Ras-related protein Rab-18 OS	0.477944	0.308123	0.115106	0.16089	0.239439	0.364552
Q15003	NCAPH	Condensin complex subunit 2 OS	0.274784	0.277319	0.228259	-0.0591787	0.17339	0.614328
P39023	RPL3	60S ribosomal protein L3 OS	0.189151	0.223652	0.280566	0.319622	0.310279	0.216321
P35249	RFC4	Replication factor C subunit 4 OS	0.0213983	0.735225	0.964377	0.0457398	0.221219	0.754517
P08621	SNRNP70	U1 small nuclear ribonucleoprotein 70 kDa OS	0.467767	0.259522	0.0891046	0.128462	0.131571	0.232883
Q15029	EFTUD2	116 kDa U5 small nuclear ribonucleoprotein component OS	0.0986139	0.217293	0.514177	0.0338872	0.270561	0.848377
Q9HCE1	MOV10	Putative helicase MOV-10 OS	0.068024	0.141522	0.492692	0.12957	0.158632	0.292765
O14980	XPO1	Exportin-1 OS	0.341384	0.450234	0.319519	0.059997	0.0477842	0.161669
P33993	MCM7	DNA replication licensing factor MCM7 OS	-0.156922	0.403073	0.56961	-0.0905538	0.239858	0.580313
P49736	MCM2	DNA replication licensing factor MCM2 OS	-0.217483	0.453642	0.493668	-0.104858	0.322208	0.62975
Q9Y2L1	DIS3	Exosome complex exonuclease RRP44 OS	-0.0303535	0.219178	0.832776	-0.092914	0.0702773	0.149174
Q53H12	AGK	Acylglycerol kinase, mitochondrial OS	0.289094	0.219546	0.150125	0.160634	0.187962	0.276954
Q14204	DYNC1H1	Cytoplasmic dynein 1 heavy chain 1 OS	0.238012	0.437514	0.445527	0.0359262	0.1143	0.640745
P17844	DDX5	Probable ATP-dependent RNA helicase DDX5 OS	0.133573	0.353274	0.579792	0.168822	0.0911159	0.0849135
Q9NQ29	LUC7L	Putative RNA-binding protein Luc7-like 1 OS	0.353812	0.35206	0.223868	0.13204	0.13563	0.233803
O94901	SUN1	SUN domain-containing protein 1 OS	0.0579387	0.610465	0.884538	-0.0278034	0.368179	0.907905
O75643	SNRNP200	U5 small nuclear ribonucleoprotein 200 kDa helicase OS	0.0955529	0.214769	0.521521	0.116823	0.217281	0.450032
Q7L8L6	FASTKD5	FAST kinase domain-containing protein 5 OS	0.253939	0.250484	0.221182	0.0812518	0.138508	0.416518
Q9UPN3	MACF1	Microtubule-actin cross-linking factor 1, isoforms 1/2/3/5 OS	0.220266	0.215215	0.218282	0.0662307	0.177294	0.583957
Q07955	SRSF1	Serine/arginine-rich splicing factor 1 OS	0.116392	0.167237	0.351298	0.233208	0.151221	0.116224
Q14739	LBR	Lamin-B receptor OS	0.361293	0.487065	0.327573	0.116607	0.277185	0.54199
Q9BT78	COPS4	COP9 signalosome complex subunit 4 OS	0.135094	0.343162	0.565694	-0.0108752	0.0891326	0.852209
Q96P70	IPO9	Importin-9 OS	0.567524	0.730944	0.310898	-0.265819	0.462431	0.424335
P60660	MYL6	Myosin light polypeptide 6 OS	0.120612	1.60928	0.908592	0.0849698	1.25115	0.91711
Q9NTJ3	SMC4	Structural maintenance of chromosomes protein 4 OS	0.357257	0.339165	0.209642	0.162103	0.08566	0.0818178
P13639	EEF2	Elongation factor 2 OS	0.327598	0.302396	0.201415	-0.0505521	0.32186	0.811102
Q9HDC9	APMAP	Adipocyte plasma membrane-associated protein OS	0.645752	0.720159	0.260607	-0.373016	0.686997	0.446264
P15880	RPS2	40S ribosomal protein S2 OS	0.232145	0.195648	0.176201	0.180623	0.0868797	0.06921
P43243	MATR3	Matrin-3 OS	-0.0976822	0.530631	0.780061	0.223829	0.272157	0.29034
P23528	CFL1	Cofilin-1 OS	0.868053	0.476004	0.235485	0.13181	0.195035	0.514397
Q9Y3D0	FAM96B	Mitotic spindle-associated MMXD complex subunit MIP18 OS	-0.339417	0.363249	0.412409	-0.233784	0.25261	0.41535
P78527	PRKDC	DNA-dependent protein kinase catalytic subunit OS	0.198777	0.33285	0.409644	0.0420897	0.164848	0.701546
P62995	TRA2B	Transformer-2 protein homolog beta OS	-0.00976672	0.243232	0.950881	0.00828984	0.17934	0.943478
P27708	CAD	CAD protein OS	-0.0910057	0.366426	0.708987	-0.0100861	0.172876	0.928727
Q7L2E3	DHX30	Putative ATP-dependent RNA helicase DHX30 OS	0.00117832	1.03298	0.998603	0.0870137	0.199532	0.528887
P84098	RPL19	60S ribosomal protein L19 OS	-0.0940872	0.212313	0.522981	-0.0104969	0.205147	0.937455
Q709C8	VPS13C	Vacuolar protein sorting-associated protein 13C OS	0.140329	0.301896	0.505261	0.0292242	0.186053	0.811087
O00159	MYO1C	Unconventional myosin-Ic OS	0.587856	0.919391	0.383452	0.0167938	0.977565	0.978965
P61221	ABCE1	ATP-binding cassette sub-family E member 1 OS	0.208461	0.369627	0.431669	-0.0904695	0.181656	0.479268
Q08380	LGALS3BP	Galectin-3-binding protein OS	-0.055241	0.300943	0.780661	0.206692	0.127899	0.107451
O75694	NUP155	Nuclear pore complex protein Nup155 OS	0.205355	0.43924	0.503097	-0.0188636	0.0865448	0.742082
Q9BVT8	TMUB1	Transmembrane and ubiquitin-like domain-containing protein 1 OS	0.785353	1.14888	0.51077	0.912079	0.5776	0.268029
P05141	SLC25A5	ADP/ATP translocase 2 OS	-0.0527375	0.307441	0.794399	0.0936146	0.233516	0.559269
Q6P2E9	EDC4	Enhancer of mRNA-decapping protein 4 OS	0.0238026	0.411998	0.929419	-0.0129718	0.298359	0.946827
Q9UBB4	ATXN10	Ataxin-10 OS	0.533608	0.273178	0.0773607	0.0990001	0.0854766	0.182678
Q92878	RAD50	DNA repair protein RAD50 OS	-0.00201412	0.388295	0.993647	0.0391006	0.126222	0.645274
P51116	FXR2	Fragile X mental retardation syndrome-related protein 2 OS	0.0959032	0.214203	0.519197	0.0189095	0.140631	0.837507
P51114	FXR1	Fragile X mental retardation syndrome-related protein 1 OS	0.0791199	0.129972	0.402281	0.174168	0.0773486	0.0598967
Q00341	HDLBP	Vigilin OS	-0.203135	0.238465	0.278074	-0.276152	0.451615	0.400562
Q00610	CLTC	Clathrin heavy chain 1 OS	0.345087	0.487441	0.344898	0.049752	0.278365	0.786165
P61313	RPL15	60S ribosomal protein L15 OS	0.174642	0.136949	0.157832	0.31857	0.185235	0.0966375
P14868	DARS	Aspartate--tRNA ligase, cytoplasmic OS	0.156453	0.2605	0.407467	0.0851367	0.0982879	0.272325
Q13263	TRIM28	Transcription intermediary factor 1-beta OS	0.00856294	0.529629	0.980202	0.148326	0.238509	0.394083
P04843	RPN1	Dolichyl-diphosphooligosaccharide--protein glycosyltransferase subunit 1 OS	0.00812877	0.300313	0.966867	0.200753	0.1792	0.191866
P53621	COPA	Coatomer subunit alpha OS	0.100988	0.186788	0.4479	0.136814	0.197496	0.353047
P22626	HNRNPA2B1	Heterogeneous nuclear ribonucleoproteins A2/B1 OS	-0.192344	1.31656	0.823867	0.123851	0.311795	0.56253
Q9UNF1	MAGED2	Melanoma-associated antigen D2 OS	-0.0221013	0.284852	0.905399	0.125874	0.102993	0.16849
P11172	UMPS	Uridine 5&#039;-monophosphate synthase OS	0.0278545	0.320962	0.894307	-0.0192484	0.234673	0.900047
Q9BSJ8	ESYT1	Extended synaptotagmin-1 OS	0.303429	0.30618	0.22821	-0.0207254	0.131757	0.810827
P62701	RPS4X	40S ribosomal protein S4, X isoform OS	0.151555	0.0825198	0.0862322	0.188173	0.203968	0.251159
O95905	ECD	Protein ecdysoneless homolog OS	0.110188	0.238913	0.508178	0.151672	0.0991193	0.117741
P62277	RPS13	40S ribosomal protein S13 OS	0.171629	0.170785	0.223877	0.250106	0.108237	0.057131
Q8TC07	TBC1D15	TBC1 domain family member 15 OS	0.24344	0.241293	0.222669	-0.250524	0.164799	0.11903
P52272	HNRNPM	Heterogeneous nuclear ribonucleoprotein M OS	-0.0279404	0.279392	0.878429	0.199118	0.161353	0.16602
P52732	KIF11	Kinesin-like protein KIF11 OS	0.325712	0.490993	0.369424	0.0153973	0.076187	0.759732
P42704	LRPPRC	Leucine-rich PPR motif-containing protein, mitochondrial OS	0.486679	0.363281	0.146097	0.310894	0.147878	0.0678321
O43432	EIF4G3	Eukaryotic translation initiation factor 4 gamma 3 OS	0.269228	0.114885	0.0556758	-0.0784037	0.0690472	0.188103
P51659	HSD17B4	Peroxisomal multifunctional enzyme type 2 OS	0.142433	0.269563	0.456702	0.0936549	0.396372	0.722022
Q96I24	FUBP3	Far upstream element-binding protein 3 OS	-0.0760332	0.450028	0.797369	-0.0438111	0.0863792	0.472333
P46977	STT3A	Dolichyl-diphosphooligosaccharide--protein glycosyltransferase subunit STT3A OS	-0.169617	0.3687	0.509122	0.0769842	0.327293	0.723179
O94874	UFL1	E3 UFM1-protein ligase 1 OS	0.0513671	0.33871	0.817385	0.022502	0.234052	0.88306
Q14008	CKAP5	Cytoskeleton-associated protein 5 OS	0.258745	0.412129	0.390441	0.163675	0.0788499	0.069403
P52597	HNRNPF	Heterogeneous nuclear ribonucleoprotein F OS	0.141215	0.51784	0.683213	0.20595	0.248451	0.287568
Q9UM54	MYO6	Unconventional myosin-VI OS	0.364811	0.838874	0.529903	0.14739	1.03715	0.828528
P31946	YWHAB	14-3-3 protein beta/alpha OS	0.470522	0.40744	0.183474	-0.051435	0.0769975	0.366781
Q8N1F7	NUP93	Nuclear pore complex protein Nup93 OS	0.139199	0.430519	0.631822	-0.106912	0.077207	0.138594
Q9H0U9	TSPYL1	Testis-specific Y-encoded-like protein 1 OS	0.65798	0.424418	0.11521	0.0531295	0.295625	0.785036
Q9UKV5	AMFR	E3 ubiquitin-protein ligase AMFR OS	0.488696	0.34191	0.131691	0.215741	0.3235	0.367414
P19532	TFE3	Transcription factor E3 OS	0.200922	2.25365	0.891454	-0.222762	0.141388	0.112142
Q14318	FKBP8	Peptidyl-prolyl cis-trans isomerase FKBP8 OS	-0.0549665	0.356409	0.814398	0.0552175	0.12087	0.511725
Q9NS91	RAD18	E3 ubiquitin-protein ligase RAD18 OS	-0.180214	0.506034	0.600205	0.110439	0.101148	0.199157
Q9BPX3	NCAPG	Condensin complex subunit 3 OS	0.201594	0.410003	0.484124	0.108767	0.147935	0.330838
Q9UBT2	UBA2	SUMO-activating enzyme subunit 2 OS	0.0355927	0.156812	0.732168	-0.0811987	0.113993	0.342604
P51571	SSR4	Translocon-associated protein subunit delta OS	0.114496	0.28128	0.553834	0.0859271	0.174209	0.482929
P38159	RBMX	RNA-binding motif protein, X chromosome OS	-0.164585	0.924918	0.787061	0.0601422	0.32964	0.781925
Q13325	IFIT5	Interferon-induced protein with tetratricopeptide repeats 5 OS	-0.0420811	0.362388	0.896379	0.0519189	0.288563	0.841379
Q14160	SCRIB	Protein scribble homolog OS	0.341097	0.311924	0.198719	-0.146664	0.160728	0.254779
Q6P1M0	SLC27A4	Long-chain fatty acid transport protein 4 OS	-0.37374	0.468565	0.301207	0.0891853	0.108684	0.291125
Q9Y6M1	IGF2BP2	Insulin-like growth factor 2 mRNA-binding protein 2 OS	0.0192794	0.496599	0.952506	0.125126	0.233472	0.451265
P07237	P4HB	Protein disulfide-isomerase OS	0.207836	0.30539	0.359735	0.240704	0.197236	0.168865
O95476	CTDNEP1	CTD nuclear envelope phosphatase 1 OS	-0.25065	0.5888	0.537692	-0.0307976	0.24981	0.8507
Q04917	YWHAH	14-3-3 protein eta OS	0.44181	0.51854	0.278	0.113902	0.204401	0.436288
Q7Z406	MYH14	Myosin-14 OS	0.0229527	1.30808	0.978515	-0.061116	1.18656	0.937042
Q14683	SMC1A	Structural maintenance of chromosomes protein 1A OS	0.0757067	0.110899	0.35857	0.0516937	0.0431128	0.173443
Q9NX40	OCIAD1	OCIA domain-containing protein 1 OS	0.942934	0.416117	0.0592087	0.221948	0.165878	0.146383
Q9Y2G8	DNAJC16	DnaJ homolog subfamily C member 16 OS	0.789666	0.604495	0.152015	0.057992	0.401119	0.825644
Q92616	GCN1	eIF-2-alpha kinase activator GCN1 OS	0.138778	0.301688	0.509151	0.0185	0.149792	0.85044
Q86VP6	CAND1	Cullin-associated NEDD8-dissociated protein 1 OS	0.5339	0.465631	0.185422	0.152659	0.122111	0.162748
Q9NW15	ANO10	Anoctamin-10 OS	0.858422	0.428607	0.0739939	0.39544	0.279194	0.133647
P47755	CAPZA2	F-actin-capping protein subunit alpha-2 OS	0.132543	0.407261	0.725394	-0.185836	0.655441	0.75723
O75489	NDUFS3	NADH dehydrogenase [ubiquinone] iron-sulfur protein 3, mitochondrial OS	0.0630178	0.363877	0.79251	-0.0103827	0.412337	0.969176
P09622	DLD	Dihydrolipoyl dehydrogenase, mitochondrial OS	-0.256411	0.33624	0.317433	-0.0990348	0.0857615	0.183487
P46060	RANGAP1	Ran GTPase-activating protein 1 OS	-0.0492265	0.213572	0.728324	-0.00713702	0.211127	0.958634
Q8N0X7	SPG20	Spartin OS	0.0816197	0.373822	0.741668	-0.0517353	0.0897214	0.423136
P46782	RPS5	40S ribosomal protein S5 OS	0.18271	0.218315	0.284218	0.152438	0.13868	0.197236
Q9P2E9	RRBP1	Ribosome-binding protein 1 OS	0.155101	0.294226	0.457598	0.0595318	0.229567	0.697297
O94887	FARP2	FERM, RhoGEF and pleckstrin domain-containing protein 2 OS	1.81664	0.30359	0.0748815	0.0573152	0.265109	0.811102
P21281	ATP6V1B2	V-type proton ATPase subunit B, brain isoform OS	-0.0355128	0.945875	0.954066	-0.200298	0.3872	0.464811
P62906	RPL10A	60S ribosomal protein L10a OS	0.0753736	0.0941751	0.299987	0.184285	0.183348	0.223827
P78371	CCT2	T-complex protein 1 subunit beta OS	-0.0148239	0.314774	0.942418	-0.100805	0.146141	0.354658
P28074	PSMB5	Proteasome subunit beta type-5 OS	0.635279	0.305006	0.0689806	0.0205686	0.234792	0.89332
Q15154	PCM1	Pericentriolar material 1 protein OS	0.415035	0.373992	0.194526	-0.0441134	0.260097	0.79662
Q15393	SF3B3	Splicing factor 3B subunit 3 OS	0.0695554	0.114482	0.403027	0.178667	0.136807	0.152077
Q15392	DHCR24	Delta(24)-sterol reductase OS	0.343404	0.515931	0.368152	0.18172	0.323818	0.433582
P67812	SEC11A	Signal peptidase complex catalytic subunit SEC11A OS	0.135175	0.488354	0.678942	-0.158257	0.702053	0.733873
O15355	PPM1G	Protein phosphatase 1G OS	0.0647097	0.165304	0.56768	0.177574	0.155526	0.186588
P63244	RACK1	Receptor of activated protein C kinase 1 OS	0.0640568	0.318035	0.760498	0.0524837	0.375049	0.831075
Q9Y266	NUDC	Nuclear migration protein nudC OS	-0.0289146	0.135803	0.74767	-0.0547468	0.114709	0.495357
P39019	RPS19	40S ribosomal protein S19 OS	0.171802	0.309565	0.437855	0.00717705	0.109131	0.919714
A5YKK6	CNOT1	CCR4-NOT transcription complex subunit 1 OS	0.236849	0.368008	0.380952	-0.0155825	0.0771546	0.759882
Q86UP2	KTN1	Kinectin OS	0.601134	1.0338	0.419907	0.337243	0.158476	0.0663638
O15269	SPTLC1	Serine palmitoyltransferase 1 OS	0.251944	0.219605	0.185269	-0.0111513	0.125243	0.891594
Q92945	KHSRP	Far upstream element-binding protein 2 OS	-0.0034079	0.361377	0.988451	0.107353	0.0988021	0.200561
Q15084	PDIA6	Protein disulfide-isomerase A6 OS	-0.027158	0.467869	0.929087	-0.0790062	0.298731	0.691851
P13489	RNH1	Ribonuclease inhibitor OS	0.0490633	0.315127	0.81269	0.0222831	0.0377141	0.413759
Q5T4S7	UBR4	E3 ubiquitin-protein ligase UBR4 OS	0.255076	0.202065	0.160335	-0.120923	0.200961	0.406739
Q9UQE7	SMC3	Structural maintenance of chromosomes protein 3 OS	-0.0426877	0.0531628	0.298827	-0.0465333	0.138268	0.618922
Q8IV63	VRK3	Inactive serine/threonine-protein kinase VRK3 OS	0.100366	1.4283	0.914255	-0.154258	0.10683	0.129526
O60884	DNAJA2	DnaJ homolog subfamily A member 2 OS	0.26274	0.492854	0.4533	0.0356645	0.0360517	0.228763
Q14566	MCM6	DNA replication licensing factor MCM6 OS	-0.197606	0.758492	0.696023	0.0246053	0.473442	0.936477
O14524	NEMP1	Nuclear envelope integral membrane protein 1 OS	0.150636	0.60827	0.709753	0.172548	0.274889	0.390517
P48444	ARCN1	Coatomer subunit delta OS	0.147001	0.251681	0.41819	0.0669187	0.169139	0.563935
P62333	PSMC6	26S protease regulatory subunit 10B OS	0.819304	0.599693	0.141614	-0.108026	0.203664	0.455235
Q13247	SRSF6	Serine/arginine-rich splicing factor 6 OS	0.106031	0.218639	0.489334	0.214549	0.126606	0.0991156
Q15717	ELAVL1	ELAV-like protein 1 OS	0.10454	0.691874	0.818034	0.193798	0.384725	0.474941
Q07021	C1QBP	Complement component 1 Q subcomponent-binding protein, mitochondrial OS	-0.0241621	0.0994258	0.714734	0.239413	0.221609	0.202218
P31270	HOXA11	Homeobox protein Hox-A11 OS	-0.0880452	1.55166	0.930672	0.0592121	0.255038	0.726494
P54886	ALDH18A1	Delta-1-pyrroline-5-carboxylate synthase OS	0.239437	0.354385	0.362477	0.0603845	0.418269	0.825887
Q8NF37	LPCAT1	Lysophosphatidylcholine acyltransferase 1 OS	0.0422117	0.257949	0.803486	0.00402334	0.1741	0.971708
Q9ULK4	MED23	Mediator of RNA polymerase II transcription subunit 23 OS	-0.188097	0.550458	0.613938	0.224682	0.130185	0.096056
Q27J81	INF2	Inverted formin-2 OS	0.422322	0.26832	0.112332	-0.0382567	0.191631	0.762491
Q3ZCQ8	TIMM50	Mitochondrial import inner membrane translocase subunit TIM50 OS	0.037937	0.359683	0.871886	0.06643	0.237839	0.676334
Q6P2Q9	PRPF8	Pre-mRNA-processing-splicing factor 8 OS	0.0917524	0.246018	0.584522	0.112239	0.183355	0.400145
P12004	PCNA	Proliferating cell nuclear antigen OS	0.302513	0.279467	0.201649	0.20356	0.175481	0.182258
Q07960	ARHGAP1	Rho GTPase-activating protein 1 OS	0.191671	0.177604	0.369259	-0.163827	0.156609	0.378409
Q9UBM7	DHCR7	7-dehydrocholesterol reductase OS	0.462613	0.203692	0.192152	0.0452598	0.0973632	0.629765
Q9BSK2	SLC25A33	Solute carrier family 25 member 33 OS	-0.353629	0.240436	0.285298	0.0680104	0.112809	0.550545
P30876	POLR2B	DNA-directed RNA polymerase II subunit RPB2 OS	-0.148002	0.184727	0.46034	0.0664551	0.0480441	0.300849
Q9BQG0	MYBBP1A	Myb-binding protein 1A OS	0.0942907	0.324301	0.751648	0.190886	0.0411591	0.0963219
P49770	EIF2B2	Translation initiation factor eIF-2B subunit beta OS	0.677465	0.172438	0.113367	0.0971902	0.170612	0.568273
Q8IWI9	MGA	MAX gene-associated protein OS	-0.707756	0.324544	0.199612	0.03856	0.186866	0.819239
Q9BYN8	MRPS26	28S ribosomal protein S26, mitochondrial OS	-0.194974	0.336935	0.563383	0.259357	0.0517981	0.0893136
Q9H165	BCL11A	B-cell lymphoma/leukemia 11A OS	-0.570296	0.100661	0.0790469	-0.396931	0.55569	0.496777
P49959	MRE11A	Double-strand break repair protein MRE11A OS	-0.0902185	0.150049	0.55139	-0.133611	0.209382	0.532619
P49792	RANBP2	E3 SUMO-protein ligase RanBP2 OS	0.133608	0.339025	0.676306	-0.0749293	0.225251	0.720068
Q86TM6	SYVN1	E3 ubiquitin-protein ligase synoviolin OS	-1.03884	0.386684	0.163845	-0.676076	0.303088	0.195428
Q9Y619	SLC25A15	Mitochondrial ornithine transporter 1 OS	-0.0573083	0.0471438	0.335402	0.102708	0.29068	0.704989
P09543	CNP	2',3'-cyclic-nucleotide 3'-phosphodiesterase OS	1.22731	0.534496	0.190178	-0.10076	0.117018	0.437698
P35251	RFC1	Replication factor C subunit 1 OS	-0.594884	0.119082	0.0895168	0.0195533	0.0737305	0.771572
P35250	RFC2	Replication factor C subunit 2 OS	-0.299749	0.131839	0.191956	0.0363083	0.252551	0.872306
P46783	RPS10	40S ribosomal protein S10 OS	-0.17038	0.0861429	0.218582	-0.199037	0.0824282	0.181355
P40937	RFC5	Replication factor C subunit 5 OS	-0.223998	0.145217	0.273638	-0.114652	0.235887	0.616628
Q9BWF3	RBM4	RNA-binding protein 4 OS	-0.0555345	0.168163	0.721843	0.252517	0.282581	0.426159
Q9H6S0	YTHDC2	Probable ATP-dependent RNA helicase YTHDC2 OS	0.0597385	0.0101034	0.075774	0.131859	0.116375	0.355191
P13010	XRCC5	X-ray repair cross-complementing protein 5 OS	-0.64913	0.214484	0.146119	0.182749	0.277753	0.522912
Q12981	BNIP1	Vesicle transport protein SEC20 OS	-0.34345	0.210836	0.260718	-0.023123	0.215611	0.904177
Q9Y4W2	LAS1L	Ribosomal biogenesis protein LAS1L OS	0.0365861	0.386177	0.91521	0.104728	0.109488	0.405259
O75569	PRKRA	Interferon-inducible double-stranded RNA-dependent protein kinase activator A OS	-0.31733	0.105751	0.147328	-0.00197112	0.25879	0.993143
P17861	XBP1	X-box-binding protein 1 OS	-0.172586	0.185994	0.414545	-0.0127233	0.0751214	0.850334
P22087	FBL	rRNA 2'-O-methyltransferase fibrillarin OS	-0.281496	0.224625	0.327042	0.158996	0.139621	0.353753
Q9BWW4	SSBP3	Single-stranded DNA-binding protein 3 OS	-1.29951	0.361592	0.123678	-0.35759	0.15981	0.194858
O14925	TIMM23	Mitochondrial import inner membrane translocase subunit Tim23 OS	-0.00667063	0.0674233	0.9115	0.195753	0.176001	0.360517
P12755	SKI	Ski oncogene OS	-0.761665	0.176434	0.103358	-0.00495861	0.0341428	0.871039
O14744	PRMT5	Protein arginine N-methyltransferase 5 OS	-0.452694	0.436767	0.381144	-0.0377449	0.298719	0.887428
Q5JTH9	RRP12	RRP12-like protein OS	0.0345839	0.185915	0.836234	0.16054	0.0658425	0.179694
O60830	TIMM17B	Mitochondrial import inner membrane translocase subunit Tim17-B OS	-0.0527129	0.315715	0.852383	-0.198385	0.0325935	0.0736284
Q5JWF2	GNAS	Guanine nucleotide-binding protein G(s) subunit alpha isoforms XLas OS	1.28703	0.491044	0.167757	-0.228226	0.0536396	0.104842
Q8IWX8	CHERP	Calcium homeostasis endoplasmic reticulum protein OS	0.256445	0.0404006	0.0706271	0.143357	0.196401	0.489895
Q15758	SLC1A5	Neutral amino acid transporter B(0) OS	2.02026	0.54247	0.119452	0.0287493	0.0992545	0.752495
P82930	MRPS34	28S ribosomal protein S34, mitochondrial OS	-0.464763	0.192846	0.181686	-0.166534	0.115222	0.289662
P54198	HIRA	Protein HIRA OS	-0.712791	0.0964267	0.0607129	-0.27193	0.707084	0.68288
O94776	MTA2	Metastasis-associated protein MTA2 OS	-0.608444	0.0780448	0.057584	-0.143063	0.439966	0.725604
Q14807	KIF22	Kinesin-like protein KIF22 OS	-0.536305	0.261792	0.211589	-0.215714	0.108612	0.217747
O00203	AP3B1	AP-3 complex subunit beta-1 OS	-0.352674	0.158974	0.196435	0.0438889	0.0637586	0.508552
O00165	HAX1	HCLS1-associated protein X-1 OS	0.199563	0.0618151	0.13727	0.0305001	0.328216	0.916813
Q13308	PTK7	Inactive tyrosine-protein kinase 7 OS	1.3033	0.254945	0.0875023	-0.250305	0.0701328	0.124517
Q9ULX3	NOB1	RNA-binding protein NOB1 OS	0.0440161	0.255423	0.847818	-0.000737178	0.0471337	0.985921
Q9NXE4	SMPD4	Sphingomyelin phosphodiesterase 4 OS	-0.119612	0.206096	0.562467	-0.058754	0.0869834	0.514568
P62070	RRAS2	Ras-related protein R-Ras2 OS	1.44776	0.230917	0.0714982	-0.0223044	0.272396	0.926607
P62854	RPS26	40S ribosomal protein S26 OS	0.129914	0.120072	0.368511	0.385563	0.0720964	0.0836896
P0CW22	RPS17L	40S ribosomal protein S17-like OS	0.150654	0.116912	0.319503	0.339874	0.211896	0.264336
Q9Y3B7	MRPL11	39S ribosomal protein L11, mitochondrial OS	0.111073	0.227743	0.615608	0.17337	0.1825	0.407355
Q8N766	EMC1	ER membrane protein complex subunit 1 OS	-0.0936849	0.414994	0.803265	-0.0781015	0.0888449	0.431248
P42356	PI4KA	Phosphatidylinositol 4-kinase alpha OS	0.178296	0.262896	0.513283	-0.0854146	0.130381	0.524285
O14979	HNRNPDL	Heterogeneous nuclear ribonucleoprotein D-like OS	-0.357951	0.106958	0.132561	0.16492	0.519694	0.731445
Q9H9A6	LRRC40	Leucine-rich repeat-containing protein 40 OS	-0.288051	0.171188	0.253264	-0.129373	0.0355784	0.122271
Q9UG63	ABCF2	ATP-binding cassette sub-family F member 2 OS	0.00526255	0.0801463	0.941053	0.0414795	0.168379	0.786581
Q9NRZ9	HELLS	Lymphoid-specific helicase OS	-0.118685	0.237566	0.60842	0.126216	0.0824784	0.275559
Q9P0J7	KCMF1	E3 ubiquitin-protein ligase KCMF1 OS	0.0794391	0.0476712	0.255479	-0.282946	0.273096	0.381258
P50454	SERPINH1	Serpin H1 OS	-0.425559	0.651473	0.525202	-0.662347	0.393788	0.253354
O95140	MFN2	Mitofusin-2 OS	-0.00964022	0.225627	0.961579	-0.0787826	0.166944	0.625351
Q9Y4I1	MYO5A	Unconventional myosin-Va OS	-0.449197	0.126273	0.124915	-0.241623	0.882431	0.7648
O43402	EMC8	ER membrane protein complex subunit 8 OS	0.0445924	0.301941	0.86892	0.356001	0.326727	0.366466
P08240	SRPR	Signal recognition particle receptor subunit alpha OS	0.29548	0.374461	0.465155	0.033246	0.167259	0.825546
Q01196	RUNX1	Runt-related transcription factor 1 OS	-0.442178	0.156485	0.156104	-0.234178	0.0330714	0.0633627
Q96SB4	SRPK1	SRSF protein kinase 1 OS	-0.0376459	0.0585989	0.530485	0.0476439	0.10477	0.63616
Q99570	PIK3R4	Phosphoinositide 3-kinase regulatory subunit 4 OS	0.118205	0.338899	0.708271	-0.0726728	0.0707905	0.383986
Q14694	USP10	Ubiquitin carboxyl-terminal hydrolase 10 OS	0.135429	0.300161	0.638434	0.119586	0.0596695	0.215933
Q13435	SF3B2	Splicing factor 3B subunit 2 OS	0.0784084	0.0681944	0.351014	-0.110592	0.0141076	0.0572692
P22695	UQCRC2	Cytochrome b-c1 complex subunit 2, mitochondrial OS	-0.251608	0.339937	0.485463	-0.0513097	0.170578	0.743949
Q9UJX3	ANAPC7	Anaphase-promoting complex subunit 7 OS	0.0533949	0.0797844	0.51751	-0.102514	0.0148083	0.0648014
contaminant_KERATIN20		contaminant_KERATIN20	-0.156273	0.218078	0.49576	-0.0472821	0.247965	0.832316
Q96TC7	RMDN3	Regulator of microtubule dynamics protein 3 OS	0.369643	0.0674381	0.0816762	0.0228187	0.208361	0.902179
O00567	NOP56	Nucleolar protein 56 OS	-0.27813	0.0801812	0.128021	-0.314024	0.355679	0.429904
P29966	MARCKS	Myristoylated alanine-rich C-kinase substrate OS	2.09734	0.758716	0.159427	0.143137	0.03637	0.113174
Q12849	GRSF1	G-rich sequence factor 1 OS	-0.233974	0.462163	0.604433	0.0481064	0.147302	0.724553
P68104	EEF1A1	Elongation factor 1-alpha 1 OS	-0.166234	0.0266162	0.0717706	0.198904	0.0764048	0.168846
O00571	DDX3X	ATP-dependent RNA helicase DDX3X OS	0.0563743	0.218336	0.777115	0.0317223	0.0932468	0.714525
Q13151	HNRNPA0	Heterogeneous nuclear ribonucleoprotein A0 OS	-0.583769	0.345361	0.252232	0.127335	0.130847	0.400027
Q8TCS8	PNPT1	Polyribonucleotide nucleotidyltransferase 1, mitochondrial OS	-0.247554	0.0650086	0.116882	-0.252609	0.855769	0.748242
O14950	MYL12B	Myosin regulatory light chain 12B OS	-0.945195	0.113254	0.0538097	-0.268209	1.59368	0.851248
Q9HD42	CHMP1A	Charged multivesicular body protein 1a OS	-0.817605	0.546695	0.281169	-0.211005	0.661781	0.730319
O00487	PSMD14	26S proteasome non-ATPase regulatory subunit 14 OS	0.769046	0.121084	0.0705853	0.217277	0.0323135	0.0667025
Q8WVC6	DCAKD	Dephospho-CoA kinase domain-containing protein OS	-0.179429	0.0388677	0.0967608	0.00867449	0.198753	0.960756
Q9H2U1	DHX36	Probable ATP-dependent RNA helicase DHX36 OS	-0.039064	0.0941647	0.662228	0.0938326	0.197752	0.623742
Q709F0	ACAD11	Acyl-CoA dehydrogenase family member 11 OS	-0.704227	0.242407	0.151996	0.114463	0.187767	0.547057
P12931	SRC	Proto-oncogene tyrosine-protein kinase Src OS	1.53748	0.208466	0.0608507	-0.062273	0.0725153	0.438537
Q6P158	DHX57	Putative ATP-dependent RNA helicase DHX57 OS	0.0697899	0.0276856	0.174103	0.212548	0.0328566	0.0693123
A7E2V4	ZSWIM8	Zinc finger SWIM domain-containing protein 8 OS	-0.221541	0.261884	0.443237	-0.182983	0.0564746	0.136789
Q9BVV7	TIMM21	Mitochondrial import inner membrane translocase subunit Tim21 OS	-0.108967	0.289253	0.688368	-0.0421889	0.0138396	0.145103
Q13459	MYO9B	Unconventional myosin-IXb OS	-0.285869	0.174236	0.259055	0.0495556	0.196673	0.782078
P62304	SNRPE	Small nuclear ribonucleoprotein E OS	-0.147945	0.215946	0.510061	-0.0569812	0.571962	0.910893
Q5C9Z4	NOM1	Nucleolar MIF4G domain-containing protein 1 OS	0.143267	0.153983	0.41372	0.151367	0.169038	0.425517
P61254	RPL26	60S ribosomal protein L26 OS	0.166058	0.0407421	0.109357	0.243231	0.226071	0.370153
Q14980	NUMA1	Nuclear mitotic apparatus protein 1 OS	0.158289	0.0219721	0.0622869	0.114954	0.293745	0.678202
Q969R5	L3MBTL2	Lethal(3)malignant brain tumor-like protein 2 OS	-0.842341	0.310852	0.1625	-0.167088	0.351561	0.62326
Q5SW79	CEP170	Centrosomal protein of 170 kDa OS	-0.158804	0.143626	0.362222	0.0248229	0.203069	0.891023
P51991	HNRNPA3	Heterogeneous nuclear ribonucleoprotein A3 OS	-1.15036	0.364221	0.140215	0.0277098	0.453855	0.945168
Q92665	MRPS31	28S ribosomal protein S31, mitochondrial OS	-0.209995	0.0296436	0.0633361	-0.150273	0.284577	0.591646
P26368	U2AF2	Splicing factor U2AF 65 kDa subunit OS	0.0823287	0.0442766	0.231344	0.43264	0.244092	0.241658
P62424	RPL7A	60S ribosomal protein L7a OS	0.0389416	0.41954	0.916908	0.234445	0.0564294	0.107322
Q99729	HNRNPAB	Heterogeneous nuclear ribonucleoprotein A/B OS	-0.627416	0.27463	0.191088	0.176606	0.317407	0.575577
Q9NZB2	FAM120A	Constitutive coactivator of PPAR-gamma-like protein 1 OS	-0.0892662	0.187868	0.623335	0.0341615	0.125532	0.766116
P21127	CDK11B	Cyclin-dependent kinase 11B OS	-0.214175	0.201804	0.374156	0.0767856	0.104197	0.486856
P23284	PPIB	Peptidyl-prolyl cis-trans isomerase B OS	0.739279	0.262259	0.156465	-0.0766337	0.0548345	0.298197
P52434	POLR2H	DNA-directed RNA polymerases I, II, and III subunit RPABC3 OS	-0.0432776	0.162833	0.771116	-0.0278359	0.145021	0.831256
Q15126	PMVK	Phosphomevalonate kinase OS	-0.0211334	0.130093	0.85624	-0.158797	0.0863467	0.233682
Q9NRL2	BAZ1A	Bromodomain adjacent to zinc finger domain protein 1A OS	0.440653	0.084223	0.0855215	-0.0332023	0.184152	0.841061
P46779	RPL28	60S ribosomal protein L28 OS	0.0980728	0.0720029	0.304842	0.118801	0.0169254	0.063918
Q9Y3U8	RPL36	60S ribosomal protein L36 OS	-0.0660924	0.00882906	0.0599572	-0.0630729	0.147878	0.654466
Q14527	HLTF	Helicase-like transcription factor OS	-0.405734	0.0561211	0.0620685	0.155841	0.127552	0.334
Q9UHB6	LIMA1	LIM domain and actin-binding protein 1 OS	-0.595308	0.244067	0.179634	0.0579977	1.24208	0.958021
P12268	IMPDH2	Inosine-5'-monophosphate dehydrogenase 2 OS	-0.397942	0.333471	0.340542	0.225962	0.318151	0.498594
Q8WWH5	TRUB1	Probable tRNA pseudouridine synthase 1 OS	-0.243674	0.411369	0.556077	-0.0528652	0.0358748	0.284822
P11802	CDK4	Cyclin-dependent kinase 4 OS	-0.295947	0.195051	0.277635	0.0363164	0.137463	0.772369
P49916	LIG3	DNA ligase 3 OS	-0.740832	0.263745	0.157	-0.175019	0.348681	0.607007
P52429	DGKE	Diacylglycerol kinase epsilon OS	0.661702	0.148145	0.0999539	0.233552	0.178223	0.315011
Q01780	EXOSC10	Exosome component 10 OS	0.0997462	0.28364	0.706194	0.0372082	0.0447111	0.448381
P43246	MSH2	DNA mismatch repair protein Msh2 OS	0.0182459	0.286183	0.942754	0.0249837	0.0602906	0.662536
Q13045	FLII	Protein flightless-1 homolog OS	-0.373055	0.0713596	0.0855887	-0.283047	0.251292	0.356885
Q96CW1	AP2M1	AP-2 complex subunit mu OS	0.103953	0.195882	0.590125	0.03923	0.0845701	0.630382
Q15424	SAFB	Scaffold attachment factor B1 OS	-0.645742	0.371919	0.246213	0.249468	0.248245	0.390353
Q96E39	RBMXL1	RNA binding motif protein, X-linked-like-1 OS	-0.578593	0.357057	0.261941	-0.0660609	0.265226	0.784395
Q8TDD1	DDX54	ATP-dependent RNA helicase DDX54 OS	-0.0818819	0.216422	0.687229	0.117726	0.190714	0.543108
Q9NVN8	GNL3L	Guanine nucleotide-binding protein-like 3-like protein OS	-0.467072	0.281407	0.256392	-0.0954731	0.154577	0.542928
O00425	IGF2BP3	Insulin-like growth factor 2 mRNA-binding protein 3 OS	-0.00465577	0.0532457	0.921675	0.393001	0.217324	0.237294
Q9H832	UBE2Z	Ubiquitin-conjugating enzyme E2 Z OS	-0.00157572	0.140099	0.989875	0.0185471	0.02152	0.437414
Q643R3	LPCAT4	Lysophospholipid acyltransferase LPCAT4 OS	-0.0957839	0.381119	0.782595	-0.0173939	0.138501	0.888099
Q9Y4A0	JRKL	Jerky protein homolog-like OS	-0.63297	0.341291	0.23189	-0.112657	0.134582	0.44654
Q96A47	ISL2	Insulin gene enhancer protein ISL-2 OS	-0.60467	0.0680762	0.050574	-0.346102	0.0712183	0.0919848
Q9H0D6	XRN2	5'-3' exoribonuclease 2 OS	0.148952	0.598233	0.784464	0.298633	0.0621642	0.093038
P27105	STOM	Erythrocyte band 7 integral membrane protein OS	0.587215	0.369739	0.266667	-0.145518	0.0344903	0.105713
P33981	TTK	Dual specificity protein kinase TTK OS	-0.334318	0.151949	0.197961	0.0182092	0.19674	0.917143
Q8IXB1	DNAJC10	DnaJ homolog subfamily C member 10 OS	-0.115477	0.236189	0.614876	-0.0697358	0.0924557	0.479465
P62158	CALM1	Calmodulin OS	0.0937233	0.122273	0.474351	0.0393715	0.561735	0.937103
P35527	KRT9	Keratin, type I cytoskeletal 9 OS	0.308074	1.00062	0.412718	-0.558861	0.872054	0.112782
P04259	KRT6B	Keratin, type II cytoskeletal 6B OS	0.537868	1.41547	0.318117	-0.310484	1.04108	0.426816
Q9UNX3	RPL26L1	60S ribosomal protein L26-like 1 OS	0.170103	0.0506486	0.132106	-0.0431429	0.660534	0.941362
P02533	KRT14	Keratin, type I cytoskeletal 14 OS	0.574644	1.36847	0.462655	0.048534	0.88028	0.919159
Q5T2N8	ATAD3C	ATPase family AAA domain-containing protein 3C OS	0.00838943	0.0338235	0.785226	0.977232	0.596712	0.25948
contaminant_SPG1_STRSP		owl|P06654| IMMUNOGLOBULIN G BINDING PROTEIN G PRECURSOR (PROTEIN G). - STREPTOCOCCUS...	0.569488	0.746992	0.163448	-0.0269136	0.337657	0.867205
Q14254	FLOT2	Flotillin-2 OS	0.245835	0.786329	0.52302	-0.254506	0.654254	0.433475
P04264	KRT1	Keratin, type II cytoskeletal 1 OS	0.351675	1.33826	0.453215	-0.591824	1.04325	0.127193
Q9NQ39	RPS10P5	Putative 40S ribosomal protein S10-like OS	0.566759	0.105474	0.0832961	-0.0790725	0.339484	0.797424
contaminant_KERATIN06		no description	0.36811	0.204186	0.0890696	-0.613442	0.554898	0.19561
Q8TAA3	PSMA8	Proteasome subunit alpha type-7-like OS	0.69233	0.205995	0.132014	-0.261192	0.296965	0.431084
P07900	HSP90AA1	Heat shock protein HSP 90-alpha OS	0.0199178	0.53177	0.945001	-0.131323	0.133872	0.144581
contaminant_GR78_YEAST		owl|P16474| 78 KD GLUCOSE REGULATED PROTEIN HOMOLOG PRECURSOR (GRP 78) (IMMUNOGLOBULIN...	0.420544	0.189167	0.196046	-0.129998	0.35523	0.695964
P13645	KRT10	Keratin, type I cytoskeletal 10 OS	0.522323	0.769787	0.122763	-0.350452	0.818387	0.300459
P13647	KRT5	Keratin, type II cytoskeletal 5 OS	0.975015	1.6465	0.412894	0.396489	1.03734	0.576034
P08238	HSP90AB1	Heat shock protein HSP 90-beta OS	0.296916	0.775851	0.350365	-0.027568	0.289023	0.809185
P50990	CCT8	T-complex protein 1 subunit theta OS	0.30729	0.238417	0.0819397	-0.124799	0.391135	0.568757
P42166	TMPO	Lamina-associated polypeptide 2, isoform alpha OS	0.613212	1.3433	0.428564	-0.185602	0.18587	0.139717
P35908	KRT2	Keratin, type II cytoskeletal 2 epidermal OS	0.577514	0.951595	0.159467	-0.237032	0.97407	0.543501
P24844	MYL9	Myosin regulatory light polypeptide 9 OS	1.41692	0.584715	0.180747	0.264511	0.836723	0.732355
P54577	YARS	Tyrosine--tRNA ligase, cytoplasmic OS	0.370988			-0.0310059
Q99943	AGPAT1	1-acyl-sn-glycerol-3-phosphate acyltransferase alpha OS	-0.37074	0.587099	0.38822	-0.217129	0.321099	0.362161
O15078	CEP290	Centrosomal protein of 290 kDa OS	-0.314386	1.23592	0.78016	-0.278628	0.586344	0.623309
Q14789	GOLGB1	Golgin subfamily B member 1 OS	0.508724			0.143138
contaminant_KERATIN21		no description	0.647789			0.187845
Q86WA8	LONP2	Lon protease homolog 2, peroxisomal OS	0.579039	1.20083	0.618985	0.207274	0.479709	0.650807
P08579	SNRPB2	U2 small nuclear ribonucleoprotein B&#039;&#039; OS	0.248341	0.0309429	0.0559446	0.306267	0.0420045	0.0615466
P22392	NME2	Nucleoside diphosphate kinase B OS	0.655824			0.216272
P04075	ALDOA	Fructose-bisphosphate aldolase A OS	0.916137			0.589311
P52209	PGD	6-phosphogluconate dehydrogenase, decarboxylating OS	0.976663			0.937026
P30049	ATP5D	ATP synthase subunit delta, mitochondrial OS	0.367867			0.36882
Q99733	NAP1L4	Nucleosome assembly protein 1-like 4 OS	0.717325			0.267104
P63000	RAC1	Ras-related C3 botulinum toxin substrate 1 OS	1.7655			0.42345
Q00403	GTF2B	Transcription initiation factor IIB OS	0.404081			0.0311938
P13746	HLA-A	HLA class I histocompatibility antigen, A-11 alpha chain OS	1.53851			-0.0356363
P13667	PDIA4	Protein disulfide-isomerase A4 OS	0.339522			0.606861
Q99653	CHP1	Calcineurin B homologous protein 1 OS	0.0647271	0.222679	0.751707	0.118316	0.122192	0.401552
P35749	MYH11	Myosin-11 OS	2.02648			0.935916
Q96BR5	COA7	Cytochrome c oxidase assembly factor 7 OS	-0.0801594	0.0988114	0.456408	0.369286	0.101107	0.121744
P02765	AHSG	Alpha-2-HS-glycoprotein OS	0.638947			0.272063
Q15007	WTAP	Pre-mRNA-splicing regulator WTAP OS	0.494814			0.161174
Q8IWC1	MAP7D3	MAP7 domain-containing protein 3 OS	0.666669			-0.0825818
P62136	PPP1CA	Serine/threonine-protein phosphatase PP1-alpha catalytic subunit OS	0.406301	0.285696	0.293745	0.174485	0.149576	0.346919
Q08188	TGM3	Protein-glutamine gamma-glutamyltransferase E OS	0.92485			0.329718
P39656	DDOST	Dolichyl-diphosphooligosaccharide--protein glycosyltransferase 48 kDa subunit OS	0.274438	0.609207	0.516919	0.383788	0.523389	0.331827
Q15363	TMED2	Transmembrane emp24 domain-containing protein 2 OS	0.155058	0.240908	0.380925	0.556786	0.339549	0.104833
Q13370	PDE3B	cGMP-inhibited 3&#039;,5&#039;-cyclic phosphodiesterase B OS	-0.00778263	0.706184	0.990079	0.475527	0.52691	0.423102
Q13144	EIF2B5	Translation initiation factor eIF-2B subunit epsilon OS	1.12215	0.170672	0.0682042	-0.0272196	0.386366	0.936781
P05783	KRT18	Keratin, type I cytoskeletal 18 OS	0.643349	1.35272	0.496676	0.353837	0.846477	0.544292
P31943	HNRNPH1	Heterogeneous nuclear ribonucleoprotein H OS	-0.0728857	0.784043	0.886877	0.153282	0.0998652	0.117144
O15372	EIF3H	Eukaryotic translation initiation factor 3 subunit H OS	0.239607			0.0413956
O75531	BANF1	Barrier-to-autointegration factor OS	0.295099	1.86392	0.809643	-0.0655683	0.0948048	0.353659
P09651	HNRNPA1	Heterogeneous nuclear ribonucleoprotein A1 OS	-0.505019	0.942514	0.451347	0.137896	0.229416	0.407155
Q3B8N5	PROX2	Prospero homeobox protein 2 OS	0.189163			0.295959
P58107	EPPK1	Epiplakin OS	0.093729	0.46885	0.762182	0.0143759	0.573003	0.969287
Q9Y5M8	SRPRB	Signal recognition particle receptor subunit beta OS	0.0196132	0.0829063	0.721707	0.089136	0.341226	0.695284
P62805	HIST1H4A	Histone H4 OS	-0.303843	1.29864	0.724534	-0.281108	0.372916	0.321661
Q12792	TWF1	Twinfilin-1 OS	0.281311	0.548222	0.60036	0.0732369	0.209763	0.708019
P10316	HLA-A	HLA class I histocompatibility antigen, A-69 alpha chain OS	1.56861			-0.0442597
P23526	AHCY	Adenosylhomocysteinase OS	0.735656			0.616291
Q9BRL6	SRSF8	Serine/arginine-rich splicing factor 8 OS	0.29878	0.13634	0.198703	0.308104	0.317067	0.400472
O00422	SAP18	Histone deacetylase complex subunit SAP18 OS	0.293242	0.0542113	0.082751	0.0763981	0.0577676	0.312579
P08758	ANXA5	Annexin A5 OS	0.506872			-0.00349113
Q9Y6E2	BZW2	Basic leucine zipper and W2 domain-containing protein 2 OS	0.529002			0.229652
Q96IZ0	PAWR	PRKC apoptosis WT1 regulator protein OS	0.726494			0.00927116
O95433	AHSA1	Activator of 90 kDa heat shock protein ATPase homolog 1 OS	0.298597	0.31738	0.244756	0.0218254	0.205139	0.870788
P09012	SNRPA	U1 small nuclear ribonucleoprotein A OS	0.458147	0.391042	0.345694	0.493264	0.133799	0.120641
Q9Y597	KCTD3	BTB/POZ domain-containing protein KCTD3 OS	0.241501			-0.0662079
Q8NB46	ANKRD52	Serine/threonine-protein phosphatase 6 regulatory ankyrin repeat subunit C OS	-0.152238	0.117653	0.154293	0.0333522	0.0986681	0.61749
Q9UPW6	SATB2	DNA-binding protein SATB2 OS	-0.103768	1.16248	0.891321	-0.235936	0.106261	0.0614481
Q13011	ECH1	Delta(3,5)-Delta(2,4)-dienoyl-CoA isomerase, mitochondrial OS	-0.223482	1.2298	0.782753	-0.0697675	0.378019	0.779522
Q9NR31	SAR1A	GTP-binding protein SAR1a OS	0.476319			0.316558
Q9NR33	POLE4	DNA polymerase epsilon subunit 4 OS	0.418577			-0.363509
P52789	HK2	Hexokinase-2 OS	0.668502			0.00291515
Q14192	FHL2	Four and a half LIM domains protein 2 OS	0.419641			-0.0026987
P13796	LCP1	Plastin-2 OS	0.578575			0.315614
P04035	HMGCR	3-hydroxy-3-methylglutaryl-coenzyme A reductase OS	0.68289			0.278733
Q14203	DCTN1	Dynactin subunit 1 OS	0.355794	0.786339	0.515291	0.204188	0.176452	0.182918
A0FGR8	ESYT2	Extended synaptotagmin-2 OS	0.304939	0.659895	0.631499	-0.0119063	0.524561	0.979572
O60763	USO1	General vesicular transport factor p115 OS	0.355882	0.355376	0.391399	0.0683519	0.285085	0.791885
P61081	UBE2M	NEDD8-conjugating enzyme Ubc12 OS	-0.128648	0.0804476	0.265044	0.108634	0.471939	0.799647
P00338	LDHA	L-lactate dehydrogenase A chain OS	0.704138	0.165553	0.104879	0.384421	0.354258	0.367658
O00124	UBXN8	UBX domain-containing protein 8 OS	0.497762			0.0657854
Q92841	DDX17	Probable ATP-dependent RNA helicase DDX17 OS	0.123993	0.48974	0.70383	0.144431	0.1488	0.234744
Q13442	PDAP1	28 kDa heat- and acid-stable phosphoprotein OS	0.578302			0.0883248
Q9Y6W5	WASF2	Wiskott-Aldrich syndrome protein family member 2 OS	0.981041			0.0483134
P30086	PEBP1	Phosphatidylethanolamine-binding protein 1 OS	0.828815			0.126647
Q9BVS4	RIOK2	Serine/threonine-protein kinase RIO2 OS	0.537978			0.210654
O15027	SEC16A	Protein transport protein Sec16A OS	-0.00675736	0.398226	0.984726	-0.0566613	0.0123563	0.0974004
Q9P0B6	CCDC167	Coiled-coil domain-containing protein 167 OS	0.593622			0.308145
P14649	MYL6B	Myosin light chain 6B OS	0.436172	1.44478	0.743113	0.581899	0.461305	0.32526
Q8N6T3	ARFGAP1	ADP-ribosylation factor GTPase-activating protein 1 OS	0.335369			0.038917
Q8N3C0	ASCC3	Activating signal cointegrator 1 complex subunit 3 OS	0.134096	0.493487	0.684227	0.0781999	0.0755368	0.214818
O43795	MYO1B	Unconventional myosin-Ib OS	0.351535	0.807536	0.529535	0.0769993	0.851175	0.889881
Reverse_sp|Q6ZU69|F205A_HUMAN	FAM205A	Protein FAM205A OS	0.696427			-0.717299
Q9H2M9	RAB3GAP2	Rab3 GTPase-activating protein non-catalytic subunit OS	-0.0728675	0.114166	0.53255	0.0273137	0.0392586	0.50516
Q9H0L4	CSTF2T	Cleavage stimulation factor subunit 2 tau variant OS	0.600594			0.016461
Q96EB6	SIRT1	NAD-dependent protein deacetylase sirtuin-1 OS	-0.0366158	0.63547	0.948238	0.0547405	0.167628	0.724571
Q9H444	CHMP4B	Charged multivesicular body protein 4b OS	0.189563	1.36344	0.832137	0.194925	0.384882	0.47289
O43765	SGTA	Small glutamine-rich tetratricopeptide repeat-containing protein alpha OS	-0.184298			0.0222733
Q02978	SLC25A11	Mitochondrial 2-oxoglutarate/malate carrier protein OS	-0.00201709	0.546358	0.995478	0.233684	0.202234	0.183312
Q96HA1	POM121	Nuclear envelope pore membrane protein POM 121 OS	0.147504			0.342166
P51648	ALDH3A2	Fatty aldehyde dehydrogenase OS	-0.358523	0.529862	0.36192	-0.104934	0.121605	0.273628
O75165	DNAJC13	DnaJ homolog subfamily C member 13 OS	0.449561			-0.568833
Q9Y2Q9	MRPS28	28S ribosomal protein S28, mitochondrial OS	0.0801694	0.524602	0.864498	0.0832612	0.0361689	0.189726
O95202	LETM1	LETM1 and EF-hand domain-containing protein 1, mitochondrial OS	-0.31791			-0.0868415
Q5VZL5	ZMYM4	Zinc finger MYM-type protein 4 OS	0.310148			0.0481149
Q9Y399	MRPS2	28S ribosomal protein S2, mitochondrial OS	0.401267			0.247546
Q9Y2Q5	LAMTOR2	Ragulator complex protein LAMTOR2 OS	-0.337996	0.34967	0.402073	-0.689082	0.291245	0.184883
P01621	2	Ig kappa chain V-III region NG9 (Fragment) OS	0.465622	0.0789533	0.0759685	0.217884	0.170677	0.322025
P26641	EEF1G	Elongation factor 1-gamma OS	0.288379	0.457531	0.536523	0.252742	0.583664	0.65019
Q8IZT6	ASPM	Abnormal spindle-like microcephaly-associated protein OS	-0.111844	0.546945	0.757057	0.240049	0.338804	0.3446
O15119	TBX3	T-box transcription factor TBX3 OS	0.454823	1.42087	0.729379	0.0517632	0.420867	0.890365
Q9BRP1	PDCD2L	Programmed cell death protein 2-like OS	0.523744			0.289521
P13637	ATP1A3	Sodium/potassium-transporting ATPase subunit alpha-3 OS	2.23932			-0.162481
Q9P0K7	RAI14	Ankycorbin OS	0.839787			0.187527
P52907	CAPZA1	F-actin-capping protein subunit alpha-1 OS	0.126622	0.478016	0.771816	-0.111986	0.629552	0.843105
P02545	LMNA	Prelamin-A/C OS	0.0229362	0.918975	0.969447	-0.165507	0.115955	0.131985
Q6NZ67	MZT2B	Mitotic-spindle organizing protein 2B OS	0.464261			-0.140573
O14828	SCAMP3	Secretory carrier-associated membrane protein 3 OS	0.43424			0.0445634
P38919	EIF4A3	Eukaryotic initiation factor 4A-III OS	0.130424	0.435289	0.655499	0.0784568	0.277844	0.673155
Q15019	42980	Septin-2 OS	0.347178	0.470501	0.48644	0.30805	0.327965	0.410814
Q15645	TRIP13	Pachytene checkpoint protein 2 homolog OS	0.102538	0.216257	0.497822	-0.00877394	0.168766	0.936456
P08865	RPSA	40S ribosomal protein SA OS	0.056729	0.0427009	0.31138	0.23082	0.111746	0.209972
P18206	VCL	Vinculin OS	0.955816			0.622913
Q15643	TRIP11	Thyroid receptor-interacting protein 11 OS	0.367214			-0.0697184
Q9BVA1	TUBB2B	Tubulin beta-2B chain OS	0.38134			-0.117178
Q01658	DR1	Protein Dr1 OS	-0.113317	1.34373	0.897264	0.0454818	0.211907	0.745768
O15160	POLR1C	DNA-directed RNA polymerases I and III subunit RPAC1 OS	0.198577	0.231539	0.438944	-0.119589	0.0752979	0.266663
P63261	ACTG1	Actin, cytoplasmic 2 OS	1.74269			1.06455
Q7Z794	KRT77	Keratin, type II cytoskeletal 1b OS	0.112422	0.340839	0.722141	-0.221589	0.115132	0.224145
P22314	UBA1	Ubiquitin-like modifier-activating enzyme 1 OS	0.520297			0.163379
P49006	MARCKSL1	MARCKS-related protein OS	2.02121			0.354056
P50395	GDI2	Rab GDP dissociation inhibitor beta OS	1.09267	0.214259	0.0877114	0.303208	0.246906	0.332595
P30101	PDIA3	Protein disulfide-isomerase A3 OS	0.145465	0.314004	0.630771	0.15365	0.406528	0.6875
P27797	CALR	Calreticulin OS	0.140376			0.179602
Q9H3G5	CPVL	Probable serine carboxypeptidase CPVL OS	0.898921			0.253131
Q9BUN8	DERL1	Derlin-1 OS	-0.193339	0.395	0.485838	0.102613	0.129023	0.30225
P62081	RPS7	40S ribosomal protein S7 OS	0.381834			0.560501
Q16186	ADRM1	Proteasomal ubiquitin receptor ADRM1 OS	0.625339	0.36716	0.0982644	0.103006	0.412495	0.707535
P62993	GRB2	Growth factor receptor-bound protein 2 OS	0.76566			0.295384
O43175	PHGDH	D-3-phosphoglycerate dehydrogenase OS	0.140642	0.465932	0.653246	-0.166686	0.0891579	0.0835846
P16949	STMN1	Stathmin OS	0.648307			0.165312
P17987	TCP1	T-complex protein 1 subunit alpha OS	0.172124	0.404113	0.537491	0.034627	0.158146	0.740986
Q96CN9	GCC1	GRIP and coiled-coil domain-containing protein 1 OS	0.549666			0.0185035
Q8WUY1	THEM6	Protein THEM6 OS	-0.427938	0.893592	0.494076	-0.458203	0.545928	0.283218
Q9NR46	SH3GLB2	Endophilin-B2 OS	-0.580449			-0.786274
Q95604	HLA-C	HLA class I histocompatibility antigen, Cw-17 alpha chain OS	0.965582			0.0257842
P53367	ARFIP1	Arfaptin-1 OS	0.125937			-0.350858
P84095	RHOG	Rho-related GTP-binding protein RhoG OS	1.69371			0.474077
O95747	OXSR1	Serine/threonine-protein kinase OSR1 OS	0.323053	0.517558	0.392668	0.0731157	0.211371	0.609909
P35453	HOXD13	Homeobox protein Hox-D13 OS	-0.253499	1.11975	0.732813	-0.0646515	0.257949	0.706548
P02538	KRT6A	Keratin, type II cytoskeletal 6A OS	1.4402	2.0594	0.50352	0.407619	1.50614	0.76729
Q15836	VAMP3	Vesicle-associated membrane protein 3 OS	0.54683			-0.488995
P62244	RPS15A	40S ribosomal protein S15a OS	0.109192	0.219477	0.479663	0.179366	0.161246	0.193856
Q9UQ80	PA2G4	Proliferation-associated protein 2G4 OS	-0.0857665			-0.0647485
O14545	TRAFD1	TRAF-type zinc finger domain-containing protein 1 OS	0.324875	0.390407	0.448398	-0.0205395	0.13704	0.867029
Q08211	DHX9	ATP-dependent RNA helicase A OS	-0.070379	0.742829	0.884735	0.16468	0.138847	0.176309
Q99613	EIF3C	Eukaryotic translation initiation factor 3 subunit C OS	0.0775855	0.634626	0.89101	0.0687019	0.0562961	0.334321
Q9BV38	WDR18	WD repeat-containing protein 18 OS	0.16216	0.0229173	0.0634082	0.216489	0.0744391	0.151839
O43615	TIMM44	Mitochondrial import inner membrane translocase subunit TIM44 OS	0.0968734	0.1433	0.362265	-0.0696926	0.163945	0.538204
P49790	NUP153	Nuclear pore complex protein Nup153 OS	0.568793			0.111437
Q9NP81	SARS2	Serine--tRNA ligase, mitochondrial OS	0.00198265			-0.086068
P33176	KIF5B	Kinesin-1 heavy chain OS	0.290427	0.466467	0.393638	-0.0146128	0.183789	0.903081
P09496	CLTA	Clathrin light chain A OS	0.317386			0.0873127
P63104	YWHAZ	14-3-3 protein zeta/delta OS	0.693397	0.721512	0.237911	0.0949413	0.1781	0.453314
Q96T76	MMS19	MMS19 nucleotide excision repair protein homolog OS	0.119887	0.0282548	0.105127	-0.114579	0.0862943	0.311528
Q9ULX6	AKAP8L	A-kinase anchor protein 8-like OS	-0.238801	0.524819	0.513207	-0.0640964	0.0748075	0.276064
Q8NBJ5	COLGALT1	Procollagen galactosyltransferase 1 OS	1.39529			0.335675
Q02790	FKBP4	Peptidyl-prolyl cis-trans isomerase FKBP4 OS	0.310342			0.232296
Q8TEM1	NUP210	Nuclear pore membrane glycoprotein 210 OS	0.119213	0.568688	0.751325	0.0246959	0.340526	0.911526
P55957	BID	BH3-interacting domain death agonist OS	-0.307707			-0.179592
Q01105	SET	Protein SET OS	0.535598			0.393893
Q08170	SRSF4	Serine/arginine-rich splicing factor 4 OS	0.0391411	0.255926	0.815891	0.219951	0.0901441	0.0516863
Q8IY17	PNPLA6	Neuropathy target esterase OS	-0.0266554	1.2647	0.974195	-0.455327	0.675283	0.363243
P40692	MLH1	DNA mismatch repair protein Mlh1 OS	0.0619317	0.26852	0.728161	0.0999401	0.0650585	0.116983
P61163	ACTR1A	Alpha-centractin OS	0.0508511	0.0906696	0.573116	-0.221437	0.0305674	0.0619441
Q92499	DDX1	ATP-dependent RNA helicase DDX1 OS	-0.51481	0.425059	0.336419	-0.945078	0.779108	0.33599
Q9BQB6	VKORC1	Vitamin K epoxide reductase complex subunit 1 OS	0.785252			0.0160176
P16989	YBX3	Y-box-binding protein 3 OS	0.228979	0.281488	0.455546	0.165119	0.0700587	0.185559
O00505	KPNA3	Importin subunit alpha-4 OS	0.248826	0.148093	0.100576	0.0680934	0.162466	0.543331
P54136	RARS	Arginine--tRNA ligase, cytoplasmic OS	0.130428	0.182553	0.496705	0.0722086	0.184713	0.678489
Q7Z2W9	MRPL21	39S ribosomal protein L21, mitochondrial OS	0.350325			0.0672137
Q9BXP5	SRRT	Serrate RNA effector molecule homolog OS	0.468042			0.295335
Q9Y6D5	ARFGEF2	Brefeldin A-inhibited guanine nucleotide-exchange protein 2 OS	0.280475	0.412828	0.51272	0.115281	0.0917151	0.326226
P81605	DCD	Dermcidin OS	0.145043	0.157967	0.252725	0.0656791	0.505819	0.842944
Q92600	RQCD1	Cell differentiation protein RCD1 homolog OS	-0.38162			-0.836056
O75396	SEC22B	Vesicle-trafficking protein SEC22b OS	0.377483	0.09108	0.107579	0.101691	0.174606	0.561373
O14646	CHD1	Chromodomain-helicase-DNA-binding protein 1 OS	0.494426			0.0352024
Q9NZI8	IGF2BP1	Insulin-like growth factor 2 mRNA-binding protein 1 OS	0.0524567	0.257486	0.757909	0.110504	0.24315	0.513653
Q04695	KRT17	Keratin, type I cytoskeletal 17 OS	0.709397	1.52913	0.505989	0.315866	0.977667	0.632065
Q7L2H7	EIF3M	Eukaryotic translation initiation factor 3 subunit M OS	0.515666			0.0106478
Q15427	SF3B4	Splicing factor 3B subunit 4 OS	0.0822066			0.0904574
Q3KQU3	MAP7D1	MAP7 domain-containing protein 1 OS	0.260675	1.0264	0.702989	0.00934816	0.126646	0.909964
Q07065	CKAP4	Cytoskeleton-associated protein 4 OS	0.0429881	0.201336	0.747006	0.147917	0.106697	0.13834
P48643	CCT5	T-complex protein 1 subunit epsilon OS	0.403501	0.571959	0.346212	0.230454	0.278426	0.288091
Q15165	PON2	Serum paraoxonase/arylesterase 2 OS	0.456337			0.184534
P30153	PPP2R1A	Serine/threonine-protein phosphatase 2A 65 kDa regulatory subunit A alpha isoform OS	0.238138	0.206027	0.183231	0.130192	0.172097	0.320355
Q13131	PRKAA1	5&#039;-AMP-activated protein kinase catalytic subunit alpha-1 OS	0.135733	0.155516	0.433481	0.0633234	0.226087	0.759906
Q01085	TIAL1	Nucleolysin TIAR OS	0.411903			-0.0093943
Q01082	SPTBN1	Spectrin beta chain, non-erythrocytic 1 OS	0.175283	0.842188	0.817765	-0.188855	0.835923	0.803123
P48668	KRT6C	Keratin, type II cytoskeletal 6C OS	2.87466			1.44575
Q01081	U2AF1	Splicing factor U2AF 35 kDa subunit OS	0.218725	0.379882	0.423704	0.0482264	0.086295	0.435178
P50991	CCT4	T-complex protein 1 subunit delta OS	0.330366	0.37815	0.269404	0.0144126	0.114587	0.847749
P46781	RPS9	40S ribosomal protein S9 OS	0.216107	0.218509	0.228842	0.448266	0.193217	0.0567124
O75787	ATP6AP2	Renin receptor OS	0.183776			0.312318
P59998	ARPC4	Actin-related protein 2/3 complex subunit 4 OS	0.475521	0.922464	0.598972	0.0611014	0.78301	0.930028
O00303	EIF3F	Eukaryotic translation initiation factor 3 subunit F OS	-0.137355			0.0357488
Q9UHL9	GTF2IRD1	General transcription factor II-I repeat domain-containing protein 1 OS	1.38124			0.16405
P21796	VDAC1	Voltage-dependent anion-selective channel protein 1 OS	0.226134	0.212464	0.206575	0.167121	0.288147	0.420897
Q53GT1	KLHL22	Kelch-like protein 22 OS	0.352117	0.852259	0.663362	0.147793	0.368421	0.671479
Q86XL3	ANKLE2	Ankyrin repeat and LEM domain-containing protein 2 OS	0.555343	1.20382	0.631996	0.190873	0.573271	0.719842
Q13185	CBX3	Chromobox protein homolog 3 OS	-0.230299	0.584239	0.676243	0.254314	0.125651	0.213975
Q13813	SPTAN1	Spectrin alpha chain, non-erythrocytic 1 OS	0.0586407	0.588403	0.87884	-0.0276491	0.63767	0.94697
Q8WY22	BRI3BP	BRI3-binding protein OS	0.238005	0.555998	0.53567	-0.107907	0.336627	0.634557
P08779	KRT16	Keratin, type I cytoskeletal 16 OS	0.583901	1.69498	0.611271	0.0832635	1.08445	0.906378
Q96MM3	ZFP42	Zinc finger protein 42 homolog OS	0.192799			-0.0567593
Q9UHR4	BAIAP2L1	Brain-specific angiogenesis inhibitor 1-associated protein 2-like protein 1 OS	1.65633			-0.0228537
P09874	PARP1	Poly [ADP-ribose] polymerase 1 OS	-0.348975	0.774152	0.516674	0.0295317	0.277973	0.870972
P04440	HLA-DPB1	HLA class II histocompatibility antigen, DP beta 1 chain OS	-0.0517856	0.270703	0.831796	-0.0686769	0.163471	0.658711
Q15149	PLEC	Plectin OS	0.0831319	0.477334	0.846262	0.308358	0.450717	0.510504
P62917	RPL8	60S ribosomal protein L8 OS	0.349391	0.410589	0.278436	0.332952	0.390176	0.277469
Q10570	CPSF1	Cleavage and polyadenylation specificity factor subunit 1 OS	0.141232			0.133743
O15371	EIF3D	Eukaryotic translation initiation factor 3 subunit D OS	-0.126936	0.412585	0.647397	-0.0658878	0.242663	0.684447
Q15382	RHEB	GTP-binding protein Rheb OS	0.615132	0.202406	0.145533	0.191798	0.171105	0.358272
O15400	STX7	Syntaxin-7 OS	0.869922			-0.0313851
Q9H2Y7	ZNF106	Zinc finger protein 106 OS	0.175795	1.81274	0.913231	-0.116314	0.271336	0.653047
P62306	SNRPF	Small nuclear ribonucleoprotein F OS	0.330409			0.0879564
O00429	DNM1L	Dynamin-1-like protein OS	0.251112	0.559245	0.518125	-0.0922822	0.186469	0.481662
P78310	CXADR	Coxsackievirus and adenovirus receptor OS	1.41764			0.15028
Q96RR1	PEO1	Twinkle protein, mitochondrial OS	0.121276	1.8343	0.919289	-0.111527	0.172547	0.379317
Q9Y371	SH3GLB1	Endophilin-B1 OS	-0.485744			-0.358857
P30460	HLA-B	HLA class I histocompatibility antigen, B-8 alpha chain OS	0.745147			-0.0591284
Q9UBR2	CTSZ	Cathepsin Z OS	0.614516			0.306876
P06454	PTMA	Prothymosin alpha OS	0.831098			0.642789
Reverse_sp|P01100|FOS_HUMAN	FOS	Proto-oncogene c-Fos OS	-0.0928031			-1.07674
P54105	CLNS1A	Methylosome subunit pICln OS	0.252296			0.0486425
Q9UNE7	STUB1	E3 ubiquitin-protein ligase CHIP OS	0.458758			0.564867
P38606	ATP6V1A	V-type proton ATPase catalytic subunit A OS	0.0652186	1.09532	0.946519	-0.0222198	0.1233	0.841136
Q13217	DNAJC3	DnaJ homolog subfamily C member 3 OS	0.0703117	0.113764	0.542719	-0.477183	0.318886	0.281027
Q13526	PIN1	Peptidyl-prolyl cis-trans isomerase NIMA-interacting 1 OS	0.56785			-0.0759055
P04844	RPN2	Dolichyl-diphosphooligosaccharide--protein glycosyltransferase subunit 2 OS	0.214823	0.187309	0.185356	0.237824	0.320363	0.327283
O43819	SCO2	Protein SCO2 homolog, mitochondrial OS	-0.47977	0.0562193	0.0526291	0.18739	0.21921	0.439963
Q8IVS2	MCAT	Malonyl-CoA-acyl carrier protein transacylase, mitochondrial OS	0.478583			0.101558
Q6SZW1	SARM1	Sterile alpha and TIR motif-containing protein 1 OS	0.118433	0.165798	0.496771	0.128934	0.345536	0.69088
O75152	ZC3H11A	Zinc finger CCCH domain-containing protein 11A OS	0.477784			0.132717
P27348	YWHAQ	14-3-3 protein theta OS	0.207249	0.284825	0.334685	-0.240856	0.420887	0.42606
Q13242	SRSF9	Serine/arginine-rich splicing factor 9 OS	-0.158983	0.410213	0.571191	0.0900759	0.334814	0.687054
Q9HD20	ATP13A1	Manganese-transporting ATPase 13A1 OS	0.113162			-0.0262416
P47897	QARS	Glutamine--tRNA ligase OS	0.355261	0.571426	0.540857	0.361736	0.289984	0.328297
P22234	PAICS	Multifunctional protein ADE2 OS	0.278836			-0.0902041
P21333	FLNA	Filamin-A OS	0.426545			0.190659
Q9H490	PIGU	Phosphatidylinositol glycan anchor biosynthesis class U protein OS	-0.426213			-0.101612
P23246	SFPQ	Splicing factor, proline- and glutamine-rich OS	-0.126057	0.710914	0.787779	0.592695	0.346197	0.0973954
Q9H089	LSG1	Large subunit GTPase 1 homolog OS	0.610776			0.322304
Q6PJG6	BRAT1	BRCA1-associated ATM activator 1 OS	0.128956	0.0367609	0.126628	-0.111034	0.0426415	0.168807
O96013	PAK4	Serine/threonine-protein kinase PAK 4 OS	0.396124	0.487176	0.455684	-0.0756376	0.287589	0.773305
O96019	ACTL6A	Actin-like protein 6A OS	0.477401	0.20105	0.184254	0.214721	0.0372285	0.0776611
P01920	HLA-DQB1	HLA class II histocompatibility antigen, DQ beta 1 chain OS	0.0377322			0.250622
Q9H6T3	RPAP3	RNA polymerase II-associated protein 3 OS	-0.0858319			-0.348712
Q00059	TFAM	Transcription factor A, mitochondrial OS	-0.39304	1.18249	0.622959	-0.0485629	0.217045	0.735712
A2VDJ0	KIAA0922	Transmembrane protein 131-like OS	0.608832	0.675841	0.423661	0.434662	0.65149	0.51849
Q9UH99	SUN2	SUN domain-containing protein 2 OS	-0.102791	0.922102	0.864727	-0.0670744	0.194221	0.610445
P19388	POLR2E	DNA-directed RNA polymerases I, II, and III subunit RPABC1 OS	-0.0476977	0.380607	0.848291	0.129381	0.170291	0.318784
Q9Y4X5	ARIH1	E3 ubiquitin-protein ligase ARIH1 OS	0.784798			0.131531
Q8WUM4	PDCD6IP	Programmed cell death 6-interacting protein OS	0.411334	0.546838	0.322442	0.0336808	0.155065	0.742921
Q9NRX1	PNO1	RNA-binding protein PNO1 OS	0.112358			-0.0692293
Q9Y2W1	THRAP3	Thyroid hormone receptor-associated protein 3 OS	0.225011	0.634905	0.704222	0.139106	0.0326568	0.104725
P07942	LAMB1	Laminin subunit beta-1 OS	1.43175	0.432632	0.134009	0.093697	0.274726	0.713898
Q8NBS9	TXNDC5	Thioredoxin domain-containing protein 5 OS	1.20988			0.52775
O00743	PPP6C	Serine/threonine-protein phosphatase 6 catalytic subunit OS	-0.0800418			-0.028915
Q14442	PIGH	Phosphatidylinositol N-acetylglucosaminyltransferase subunit H OS	0.748078			0.259542
O75147	OBSL1	Obscurin-like protein 1 OS	0.189762	0.282616	0.516464	0.0384575	0.388497	0.911453
Q8IWZ3	ANKHD1	Ankyrin repeat and KH domain-containing protein 1 OS	-0.115373	0.518	0.736831	-0.00201513	0.0628483	0.960761
Q9H3S5	PIGM	GPI mannosyltransferase 1 OS	-0.0920773			-0.588989
P19012	KRT15	Keratin, type I cytoskeletal 15 OS	2.46272			1.39932
P42167	TMPO	Lamina-associated polypeptide 2, isoforms beta/gamma OS	0.162284	0.920544	0.788951	0.0334853	0.0206117	0.106501
P06493	CDK1	Cyclin-dependent kinase 1 OS	0.295506	0.130306	0.0591251	-0.0370234	0.0388438	0.240556
Q04637	EIF4G1	Eukaryotic translation initiation factor 4 gamma 1 OS	0.266819	0.258867	0.216143	-0.0210365	0.156318	0.837374
O75410	TACC1	Transforming acidic coiled-coil-containing protein 1 OS	0.192989			0.221752
Q92830	KAT2A	Histone acetyltransferase KAT2A OS	-0.0461211			0.530539
Q6PKG0	LARP1	La-related protein 1 OS	0.315873	0.244527	0.1547	0.277617	0.175302	0.11118
P18615	NELFE	Negative elongation factor E OS	-0.388203			-0.137807
P50213	IDH3A	Isocitrate dehydrogenase [NAD] subunit alpha, mitochondrial OS	0.259251	0.350146	0.328251	0.0543175	0.183858	0.659758
Q9UFF9	CNOT8	CCR4-NOT transcription complex subunit 8 OS	0.173775	0.0418313	0.107334	0.107454	0.0887641	0.336556
P05787	KRT8	Keratin, type II cytoskeletal 8 OS	0.295761			-0.0647125
O15226	NKRF	NF-kappa-B-repressing factor OS	0.190157	0.0985805	0.0791012	0.319104	0.211665	0.12068
Q9UHV7	MED13	Mediator of RNA polymerase II transcription subunit 13 OS	-0.158521			-0.124893
P63208	SKP1	S-phase kinase-associated protein 1 OS	0.162243	0.11963	0.305965	0.280865	0.170099	0.257585
Q9UHV9	PFDN2	Prefoldin subunit 2 OS	0.785818			0.230231
O43852	CALU	Calumenin OS	0.330967			-0.139704
P33992	MCM5	DNA replication licensing factor MCM5 OS	0.100088	0.315145	0.637487	0.0815752	0.218944	0.584859
P33991	MCM4	DNA replication licensing factor MCM4 OS	-0.10152	0.804113	0.847191	-0.0253672	0.329193	0.90604
P50914	RPL14	60S ribosomal protein L14 OS	0.221442	0.145968	0.119436	0.249063	0.206833	0.172326
O60701	UGDH	UDP-glucose 6-dehydrogenase OS	0.122115			-0.270857
P49755	TMED10	Transmembrane emp24 domain-containing protein 10 OS	0.174112	0.136213	0.321678	0.895512	0.118174	0.0592324
P15927	RPA2	Replication protein A 32 kDa subunit OS	-0.185315	1.75948	0.872065	-0.222915	0.202645	0.197024
P50851	LRBA	Lipopolysaccharide-responsive and beige-like anchor protein OS	0.176039	0.228246	0.472387	-0.0345793	0.0680307	0.603225
P15924	DSP	Desmoplakin OS	0.232822	0.615115	0.579424	-0.0178429	0.314672	0.93072
Q9UBQ5	EIF3K	Eukaryotic translation initiation factor 3 subunit K OS	0.117623	0.204738	0.424551	-0.0929266	0.220458	0.541272
P06753	TPM3	Tropomyosin alpha-3 chain OS	-0.302166	1.49451	0.759636	-0.157799	1.33897	0.857142
Q5JXB2	UBE2NL	Putative ubiquitin-conjugating enzyme E2 N-like OS	-0.131136			-0.0733468
Q86VI3	IQGAP3	Ras GTPase-activating-like protein IQGAP3 OS	-0.0298966	0.583558	0.953956	0.25222	0.148593	0.251288
O60664	PLIN3	Perilipin-3 OS	0.00845415			-0.0785225
O95716	RAB3D	Ras-related protein Rab-3D OS	0.884886			0.278238
Q16611	BAK1	Bcl-2 homologous antagonist/killer OS	1.12718			0.612803
Q96RE7	NACC1	Nucleus accumbens-associated protein 1 OS	0.415688			0.130098
Q9BV81	EMC6	ER membrane protein complex subunit 6 OS	0.498541	0.535993	0.24848	0.149705	0.199334	0.323016
O43143	DHX15	Pre-mRNA-splicing factor ATP-dependent RNA helicase DHX15 OS	0.205388	0.135363	0.119403	0.167019	0.1364	0.168004
Q9NRD1	FBXO6	F-box only protein 6 OS	0.0539753	0.403539	0.838339	0.000591441	0.281815	0.99743
Q9BZZ5	API5	Apoptosis inhibitor 5 OS	0.25103	0.383575	0.374576	0.141562	0.127308	0.193962
Q8IYB8	SUPV3L1	ATP-dependent RNA helicase SUPV3L1, mitochondrial OS	0.0100983	0.524663	0.982676	0.12264	0.108173	0.355018
P16402	HIST1H1D	Histone H1.3 OS	0.918911			0.54873
Q9UI10	EIF2B4	Translation initiation factor eIF-2B subunit delta OS	0.283769			-0.0262609
P34931	HSPA1L	Heat shock 70 kDa protein 1-like OS	0.28278			-0.370947
Q8TEX9	IPO4	Importin-4 OS	0.657025	0.355494	0.0852859	0.0348507	0.333241	0.872953
P34932	HSPA4	Heat shock 70 kDa protein 4 OS	0.0582618			-0.52359
Q9GZT3	SLIRP	SRA stem-loop-interacting RNA-binding protein, mitochondrial OS	0.272453	0.498357	0.443631	0.237643	0.09948	0.0537461
Q96DI7	SNRNP40	U5 small nuclear ribonucleoprotein 40 kDa protein OS	-0.172941	0.313257	0.57799	0.14288	0.0366407	0.114199
P18827	SDC1	Syndecan-1 OS	1.98119			-0.359998
Q96HC4	PDLIM5	PDZ and LIM domain protein 5 OS	0.659699			0.101804
O95573	ACSL3	Long-chain-fatty-acid--CoA ligase 3 OS	0.15123	0.485674	0.643668	0.37595	0.394054	0.240245
Q8IV08	PLD3	Phospholipase D3 OS	0.267237	0.0605349	0.101111	-0.151981	0.298685	0.602902
P55265	ADAR	Double-stranded RNA-specific adenosine deaminase OS	-0.148804	0.87761	0.796676	0.09764	0.208754	0.502933
Q9NYL9	TMOD3	Tropomodulin-3 OS	0.455958	0.834628	0.443913	0.0439372	0.661003	0.918859
Q8N1N4	KRT78	Keratin, type II cytoskeletal 78 OS	3.07653			2.05644
O75347	TBCA	Tubulin-specific chaperone A OS	0.313466			0.0722622
Q9H9E3	COG4	Conserved oligomeric Golgi complex subunit 4 OS	0.161301			0.0546321
P25685	DNAJB1	DnaJ homolog subfamily B member 1 OS	0.447953			0.0381469
P25686	DNAJB2	DnaJ homolog subfamily B member 2 OS	0.491638			0.10618
Q9Y2X7	GIT1	ARF GTPase-activating protein GIT1 OS	0.378333			-0.0296738
P78362	SRPK2	SRSF protein kinase 2 OS	0.662867			0.34724
P83731	RPL24	60S ribosomal protein L24 OS	0.256239	0.269778	0.407406	0.451217	0.193888	0.18779
Q7L5D6	GET4	Golgi to ER traffic protein 4 homolog OS	0.0467303	0.203809	0.800382	0.105611	0.175377	0.550903
P40925	MDH1	Malate dehydrogenase, cytoplasmic OS	0.471204			0.306964
P40926	MDH2	Malate dehydrogenase, mitochondrial OS	0.883485			1.10568
Q92890	UFD1L	Ubiquitin fusion degradation protein 1 homolog OS	0.404033			-0.0134052
Q15155	NOMO1	Nodal modulator 1 OS	-0.0771993			-0.112757
O60568	PLOD3	Procollagen-lysine,2-oxoglutarate 5-dioxygenase 3 OS	1.17322			-0.00746838
Q9BZX2	UCK2	Uridine-cytidine kinase 2 OS	0.058933	0.363522	0.856523	-0.00602284	0.0334853	0.841427
P07947	YES1	Tyrosine-protein kinase Yes OS	1.41863			-0.18016
Q6Y7W6	GIGYF2	PERQ amino acid-rich with GYF domain-containing protein 2 OS	0.0579049			-0.329564
Q9UMR2	DDX19B	ATP-dependent RNA helicase DDX19B OS	0.283107	0.176884	0.264842	-0.110761	0.222374	0.609324
Q16576	RBBP7	Histone-binding protein RBBP7 OS	1.02975			0.27079
Q9Y262	EIF3L	Eukaryotic translation initiation factor 3 subunit L OS	-0.136697	0.0487572	0.157282	-0.237437	0.0491303	0.0924902
O14497	ARID1A	AT-rich interactive domain-containing protein 1A OS	0.34535			0.0897513
Q86VS8	HOOK3	Protein Hook homolog 3 OS	0.0064281			-0.27751
P11717	IGF2R	Cation-independent mannose-6-phosphate receptor OS	0.154003	0.508258	0.742272	-0.0130727	0.25588	0.954083
Q9BUL8	PDCD10	Programmed cell death protein 10 OS	0.493848			0.138509
Q13509	TUBB3	Tubulin beta-3 chain OS	0.23331			-0.0968053
Q9NYY8	FASTKD2	FAST kinase domain-containing protein 2 OS	0.158164	0.39309	0.670657	0.270618	0.242812	0.359924
Q9UHX1	PUF60	Poly(U)-binding-splicing factor PUF60 OS	0.199167	0.166346	0.173821	-0.11095	0.240386	0.507902
Q9H3N1	TMX1	Thioredoxin-related transmembrane protein 1 OS	-0.039885	0.260965	0.864483	-0.151027	0.326465	0.631177
P00558	PGK1	Phosphoglycerate kinase 1 OS	0.543049			0.165738
Q96AE4	FUBP1	Far upstream element-binding protein 1 OS	0.323031			0.0975228
Q7Z3B4	NUP54	Nucleoporin p54 OS	-0.447709			-0.488259
Q9NR28	DIABLO	Diablo homolog, mitochondrial OS	0.0379471			0.12106
P39880	CUX1	Homeobox protein cut-like 1 OS	-0.530723	1.13043	0.501528	-0.327726	0.353333	0.249396
Q8TBC3	SHKBP1	SH3KBP1-binding protein 1 OS	0.485953			0.0562755
P51784	USP11	Ubiquitin carboxyl-terminal hydrolase 11 OS	0.0800572	0.733919	0.90256	0.191402	0.108349	0.242392
Q02413	DSG1	Desmoglein-1 OS	0.402861	1.20647	0.719132	-0.212988	0.673244	0.73218
Q96RN5	MED15	Mediator of RNA polymerase II transcription subunit 15 OS	-0.035538	0.444218	0.928278	0.287781	0.0630745	0.0978847
Q14839	CHD4	Chromodomain-helicase-DNA-binding protein 4 OS	-0.210924	1.05022	0.761144	-0.0182626	0.180084	0.876744
Q8N5G2	TMEM57	Macoilin OS	0.0852832	1.02185	0.898313	0.18434	0.441037	0.544328
Q9Y265	RUVBL1	RuvB-like 1 OS	-0.0470026	0.347598	0.836614	0.0604805	0.192	0.64006
P0CG48	UBC	Polyubiquitin-C OS	2.0518			-0.448066
O14776	TCERG1	Transcription elongation regulator 1 OS	0.153431			0.0600629
P56192	MARS	Methionine--tRNA ligase, cytoplasmic OS	0.00609238	0.0269159	0.802776	0.103154	0.226822	0.636142
P26639	TARS	Threonine--tRNA ligase, cytoplasmic OS	0.303899			0.229977
P0CG47	UBB	Polyubiquitin-B OS	1.65251			0.0332206
P53396	ACLY	ATP-citrate synthase OS	-0.0728827			-0.0915052
Q15907	RAB11B	Ras-related protein Rab-11B OS	0.537395	0.225604	0.183706	0.00927406	0.21878	0.961881
O60888	CUTA	Protein CutA OS	0.328215			-0.265535
Q8N983	MRPL43	39S ribosomal protein L43, mitochondrial OS	0.00415084	0.207339	0.981981	-0.0765902	0.092663	0.45052
O75179	ANKRD17	Ankyrin repeat domain-containing protein 17 OS	0.0559948	0.386875	0.871467	0.000414375	0.250816	0.998513
Q13098	GPS1	COP9 signalosome complex subunit 1 OS	0.0262783	0.313021	0.897721	0.0743582	0.277104	0.687781
Q9NQP4	PFDN4	Prefoldin subunit 4 OS	0.095162			-0.228062
Q12906	ILF3	Interleukin enhancer-binding factor 3 OS	-0.0765723	0.345367	0.737947	0.00998043	0.339827	0.964054
O43670	ZNF207	BUB3-interacting and GLEBS motif-containing protein ZNF207 OS	0.313056			0.611169
Q96CP6	GRAMD1A	GRAM domain-containing protein 1A OS	-0.381387	0.720646	0.456091	0.0648488	0.249425	0.696586
Q8WWI1	LMO7	LIM domain only protein 7 OS	0.114297	1.11387	0.875307	0.0599094	0.807183	0.909472
Q96JN8	NEURL4	Neuralized-like protein 4 OS	-0.064424	1.41481	0.944317	-0.0313696	0.182579	0.794081
Q9NSD9	FARSB	Phenylalanine--tRNA ligase beta subunit OS	0.471977	0.27836	0.099022	0.124892	0.220379	0.429805
Q02809	PLOD1	Procollagen-lysine,2-oxoglutarate 5-dioxygenase 1 OS	0.109663	0.554024	0.82624	0.0954427	0.101464	0.410363
P45880	VDAC2	Voltage-dependent anion-selective channel protein 2 OS	0.200019	0.162353	0.166441	0.206943	0.43431	0.495972
contaminant_INT-STD1		BSA	0.617937	0.679646	0.255979	0.129211	0.348706	0.586742
Q01518	CAP1	Adenylyl cyclase-associated protein 1 OS	0.187357			0.23982
P36776	LONP1	Lon protease homolog, mitochondrial OS	0.0941256	0.493528	0.832283	0.151889	0.172931	0.431515
P12956	XRCC6	X-ray repair cross-complementing protein 6 OS	-0.242941	0.913515	0.690303	0.2044	0.375131	0.444915
P54652	HSPA2	Heat shock-related 70 kDa protein 2 OS	-0.429141			0.4511
P07951	TPM2	Tropomyosin beta chain OS	0.286147	1.56056	0.838474	0.349575	0.188369	0.231757
Q15056	EIF4H	Eukaryotic translation initiation factor 4H OS	0.401828			0.204965
O95218	ZRANB2	Zinc finger Ran-binding domain-containing protein 2 OS	0.526187			0.380207
Q00839	HNRNPU	Heterogeneous nuclear ribonucleoprotein U OS	-0.0576473	0.739322	0.904935	0.326929	0.338678	0.236495
P22090	RPS4Y1	40S ribosomal protein S4, Y isoform 1 OS	-0.329956			-0.486609
Q58FF8	HSP90AB2P	Putative heat shock protein HSP 90-beta 2 OS	0.984684			-0.17073
Q8NBX0	SCCPDH	Saccharopine dehydrogenase-like oxidoreductase OS	-0.0256803	0.358932	0.912708	0.1306	0.068509	0.0807679
O75153	CLUH	Clustered mitochondria protein homolog OS	0.15877			-0.0521205
O14579	COPE	Coatomer subunit epsilon OS	0.254625	0.402125	0.535069	-0.0130676	0.385043	0.969469
P49327	FASN	Fatty acid synthase OS	0.45724	0.573748	0.301518	-0.0044891	0.337765	0.983725
Q8WWK9	CKAP2	Cytoskeleton-associated protein 2 OS	0.128411	0.157482	0.454795	-0.0644429	0.168116	0.683752
Q00688	FKBP3	Peptidyl-prolyl cis-trans isomerase FKBP3 OS	0.56442			0.172572
O60271	SPAG9	C-Jun-amino-terminal kinase-interacting protein 4 OS	-0.209935			-0.0935308
P19387	POLR2C	DNA-directed RNA polymerase II subunit RPB3 OS	0.46932			0.545195
Q86UP3	ZFHX4	Zinc finger homeobox protein 4 OS	-0.173008	1.4217	0.852588	-0.0894205	0.188033	0.496707
P30508	HLA-C	HLA class I histocompatibility antigen, Cw-12 alpha chain OS	1.00798			0.0337796
Q93050	ATP6V0A1	V-type proton ATPase 116 kDa subunit a isoform 1 OS	0.901347			-0.310957
Q6PML9	SLC30A9	Zinc transporter 9 OS	0.166991	0.142992	0.346604	0.0737582	0.105344	0.503139
Q9NVW2	RLIM	E3 ubiquitin-protein ligase RLIM OS	0.0440584	0.232393	0.833235	-0.113113	0.0599313	0.228205
Q96CT7	CCDC124	Coiled-coil domain-containing protein 124 OS	0.56589			0.294885
P54707	ATP12A	Potassium-transporting ATPase alpha chain 2 OS	0.966493			-0.049474
O43865	AHCYL1	Adenosylhomocysteinase 2 OS	0.226942			0.30841
Q92905	COPS5	COP9 signalosome complex subunit 5 OS	-0.338033			0.126524
Q08554	DSC1	Desmocollin-1 OS	1.32658			0.429774
Q13438	OS9	Protein OS-9 OS	-0.440257	0.801254	0.441697	-0.494898	0.31813	0.114551
O15212	PFDN6	Prefoldin subunit 6 OS	0.206528			-0.0424868
O95396	MOCS3	Adenylyltransferase and sulfurtransferase MOCS3 OS	0.262632	0.120362	0.199506	0.0827975	0.0504126	0.258817
P08727	KRT19	Keratin, type I cytoskeletal 19 OS	2.42746			1.38691
Q9UJS0	SLC25A13	Calcium-binding mitochondrial carrier protein Aralar2 OS	0.174177	0.469497	0.586334	0.271288	0.434375	0.392446
P61289	PSME3	Proteasome activator complex subunit 3 OS	0.1471	0.260941	0.571522	0.0230434	0.0567144	0.66798
Q7RTS9	DYM	Dymeclin OS	0.152016	0.339357	0.640508	-0.0965067	0.0911269	0.374784
Q96IV0	NGLY1	Peptide-N(4)-(N-acetyl-beta-glucosaminyl)asparagine amidase OS	0.291619	0.286017	0.21944	0.00593168	0.19393	0.962565
Q9H3U1	UNC45A	Protein unc-45 homolog A OS	0.00502762	0.305494	0.985186	0.0096991	0.22726	0.961623
Q9H583	HEATR1	HEAT repeat-containing protein 1 OS	0.936301			0.0909371
Q9Y490	TLN1	Talin-1 OS	0.0463946	0.186502	0.708556	-0.273706	0.338327	0.296163
P06576	ATP5B	ATP synthase subunit beta, mitochondrial OS	-0.0791281	0.43532	0.782698	-0.143109	0.426287	0.619728
Q99627	COPS8	COP9 signalosome complex subunit 8 OS	0.109802			0.0451011
Q92973	TNPO1	Transportin-1 OS	0.189414	0.101586	0.230761	0.0512757	0.195243	0.773607
Q9UJX2	CDC23	Cell division cycle protein 23 homolog OS	0.273945	0.0923261	0.148936	0.120613	0.215292	0.573452
P40227	CCT6A	T-complex protein 1 subunit zeta OS	0.152995	0.282392	0.583787	-0.0834067	0.228384	0.696497
Q9NUD5	ZCCHC3	Zinc finger CCHC domain-containing protein 3 OS	0.342641	0.124828	0.160509	0.0971833	0.138023	0.501352
Q13838	DDX39B	Spliceosome RNA helicase DDX39B OS	0.333591	0.549732	0.548494	0.0617458	0.105739	0.560549
Q9UMS4	PRPF19	Pre-mRNA-processing factor 19 OS	0.162216	0.138913	0.346622	0.258473	0.376681	0.509558
Q9BWG4	SSBP4	Single-stranded DNA-binding protein 4 OS	-1.15088	0.485124	0.184414	-0.315142	0.14098	0.195039
Q9Y2H1	STK38L	Serine/threonine-protein kinase 38-like OS	0.447395	0.122	0.121265	-0.0385422	0.0885654	0.648779
Q96L58	B3GALT6	Beta-1,3-galactosyltransferase 6 OS	0.605547	0.451527	0.308896	0.266331	0.0595853	0.0998844
P01106	MYC	Myc proto-oncogene protein OS	-0.382132	0.246791	0.272719	-0.0783143	0.059766	0.31503
Q9NZM5	GLTSCR2	Glioma tumor suppressor candidate region gene 2 protein OS	0.0270581	0.0908234	0.746147	0.231309	0.401558	0.564808
Q9Y4P3	TBL2	Transducin beta-like protein 2 OS	0.270231	0.20712	0.31618	0.153383	0.0612481	0.175193
P17858	PFKL	6-phosphofructokinase, liver type OS	-0.0480954	0.485643	0.911414	-0.273928	0.100937	0.162267
Q9NPG3	UBN1	Ubinuclein-1 OS	-0.386012	0.126156	0.144582	-0.37332	0.590596	0.535615
Q09028	RBBP4	Histone-binding protein RBBP4 OS	-0.627488	0.355757	0.24273	-0.13653	0.18613	0.48833
O94973	AP2A2	AP-2 complex subunit alpha-2 OS	-0.323781	0.751326	0.651553	0.120976	0.235591	0.600142
P53350	PLK1	Serine/threonine-protein kinase PLK1 OS	-0.238379	0.254841	0.412079	-0.103282	0.0354012	0.151378
O76024	WFS1	Wolframin OS	0.661093	0.893417	0.485549	0.0416495	0.0220646	0.228179
O15397	IPO8	Importin-8 OS	0.12239	0.0784918	0.271039	-0.0479014	0.0305071	0.269376
P31942	HNRNPH3	Heterogeneous nuclear ribonucleoprotein H3 OS	-1.05686	0.672796	0.269274	-0.239602	0.152336	0.268969
Q16643	DBN1	Drebrin OS	-0.633509	0.304817	0.208776	0.0157728	0.695933	0.979602
Q9NZJ7	MTCH1	Mitochondrial carrier homolog 1 OS	-0.0842816	0.19479	0.650416	0.050977	0.19337	0.772817
Q9NZJ4	SACS	Sacsin OS	0.0243335	0.207424	0.895335	-0.161489	0.375368	0.652033
Q6P3W7	SCYL2	SCY1-like protein 2 OS	-0.179205	0.10018	0.239649	0.189322	0.146985	0.319622
Q8N201	INTS1	Integrator complex subunit 1 OS	-0.203125	0.0517064	0.113376	-0.573901	0.897349	0.53191
Q8TCJ2	STT3B	Dolichyl-diphosphooligosaccharide--protein glycosyltransferase subunit STT3B OS	0.205092	0.195661	0.377813	0.314889	0.0940237	0.132468
P53618	COPB1	Coatomer subunit beta OS	0.458276	0.350385	0.315524	-0.0912296	0.0908536	0.390588
P61962	DCAF7	DDB1- and CUL4-associated factor 7 OS	0.0953879	0.180027	0.590609	-0.216762	0.138855	0.270765
Q6W2J9	BCOR	BCL-6 corepressor OS	-0.661589	0.128442	0.0868513	-0.205555	0.271871	0.478702
P41091	EIF2S3	Eukaryotic translation initiation factor 2 subunit 3 OS	-0.226175	0.139558	0.261912	-0.197927	0.0795158	0.176206
Q53GQ0	HSD17B12	Estradiol 17-beta-dehydrogenase 12 OS	0.315335	0.202104	0.270888	0.158518	0.10096	0.269387
P10599	TXN	Thioredoxin OS	0.0050586	0.0525212	0.913816	0.0947893	0.166526	0.568513
P14923	JUP	Junction plakoglobin OS	0.570581	0.603276	0.408696	-0.341166	0.429226	0.462855
Q8TAQ2	SMARCC2	SWI/SNF complex subunit SMARCC2 OS	-0.196362	0.346201	0.56962	-0.234668	0.276581	0.442309
P25787	PSMA2	Proteasome subunit alpha type-2 OS	0.7949	0.377249	0.206121	0.120546	0.0777384	0.272369
Q14669	TRIP12	E3 ubiquitin-protein ligase TRIP12 OS	0.169721	0.238903	0.498512	0.0581246	0.0922031	0.536472
Q8N3Z3	GTPBP8	GTP-binding protein 8 OS	-0.0932949	0.125455	0.483967	0.0220295	0.097064	0.802278
Q14103	HNRNPD	Heterogeneous nuclear ribonucleoprotein D0 OS	-0.750648	0.434342	0.247243	0.0160521	0.307744	0.953124
contaminant_KERATIN18		contaminant_KERATIN18	-0.47443	0.0963379	0.0907888	-0.360528	0.644723	0.574024
Q9Y625	GPC6	Glypican-6 OS	1.25014	0.960138	0.316725	0.107792	0.144317	0.482575
Q96EY7	PTCD3	Pentatricopeptide repeat domain-containing protein 3, mitochondrial OS	-0.307542	0.291513	0.375913	0.0889224	0.0353584	0.174492
Q9UID3	VPS51	Vacuolar protein sorting-associated protein 51 homolog OS	0.221429	0.163254	0.305938	-0.192018	0.08526	0.193675
Q9BXS5	AP1M1	AP-1 complex subunit mu-1 OS	0.138589	0.250949	0.577886	0.052147	0.129274	0.669962
Q9UKV3	ACIN1	Apoptotic chromatin condensation inducer in the nucleus OS	0.162069	0.351622	0.632247	0.000811926	0.251642	0.997095
Q99959	PKP2	Plakophilin-2 OS	-0.116944	0.122526	0.405924	-0.125301	0.243883	0.599981
Q7KZN9	COX15	Cytochrome c oxidase assembly protein COX15 homolog OS	0.0343809	0.118116	0.751397	0.159972	0.322877	0.610907
O43592	XPOT	Exportin-T OS	0.755365	0.347629	0.200288	0.00360152	0.00302525	0.341209
Q12905	ILF2	Interleukin enhancer-binding factor 2 OS	-0.121825	0.212889	0.56686	0.187092	0.200914	0.413457
P07339	CTSD	Cathepsin D OS	0.210159	0.131277	0.264788	0.235467	0.636825	0.693273
Q8WXH0	SYNE2	Nesprin-2 OS	-0.385939	0.467481	0.450892	-0.159266	0.0801351	0.217607
contaminant_KERATIN03		contaminant_KERATIN03	-0.341987	0.230011	0.28261	-0.574429	0.433506	0.312066
Q13951	CBFB	Core-binding factor subunit beta OS	-0.948261	0.235961	0.110881	-0.307045	0.0559231	0.08154
Q15021	NCAPD2	Condensin complex subunit 1 OS	0.332343	0.332572	0.392033	-0.00904537	0.0950152	0.914803
Q9Y6J9	TAF6L	TAF6-like RNA polymerase II p300/CBP-associated factor-associated factor 65 kDa subunit 6L OS	-0.197494	0.0257101	0.0584375	0.0997746	0.161635	0.543112
Q9NRC1	ST7	Suppressor of tumorigenicity 7 protein OS	-0.388981	0.35806	0.367333	0.106143	0.143677	0.486064
Q8WUM0	NUP133	Nuclear pore complex protein Nup133 OS	0.260977	0.606194	0.651835	0.175897	0.185564	0.40802
Q13547	HDAC1	Histone deacetylase 1 OS	-0.458894	0.149507	0.144146	-0.0229607	0.260087	0.920928
Q9P2E5	CHPF2	Chondroitin sulfate glucuronyltransferase OS	-0.521782	0.109112	0.0934574	-0.403221	0.432909	0.413385
P55795	HNRNPH2	Heterogeneous nuclear ribonucleoprotein H2 OS	-0.280264	0.130506	0.2025	-0.100344	0.0338245	0.148963
Q10567	AP1B1	AP-1 complex subunit beta-1 OS	0.142721	0.0842434	0.251719	0.0402195	0.175021	0.799963
O75521	ECI2	Enoyl-CoA delta isomerase 2, mitochondrial OS	-0.789736	0.18704	0.105635	-0.121161	0.259621	0.628616
Q92545	TMEM131	Transmembrane protein 131 OS	-0.387526	0.481106	0.458651	-0.0723965	0.0365696	0.218397
Q9H078	CLPB	Caseinolytic peptidase B protein homolog OS	0.611731	0.397287	0.274066	0.0124512	0.0949607	0.883277
P82650	MRPS22	28S ribosomal protein S22, mitochondrial OS	-0.2579	0.209859	0.332395	-0.121113	0.527088	0.799979
Q13885	TUBB2A	Tubulin beta-2A chain OS	-0.192041	0.0660398	0.151855	-0.684003	0.317189	0.201716
O00148	DDX39A	ATP-dependent RNA helicase DDX39A OS	0.239513	0.416278	0.565167	-0.172073	0.360152	0.621709
contaminant_KERATIN22		contaminant_KERATIN22	-0.439917	0.378871	0.34823	-0.716147	0.387518	0.232646
Q9Y2R4	DDX52	Probable ATP-dependent RNA helicase DDX52 OS	-0.590462	0.657888	0.42481	-0.279817	0.193171	0.289104
Q8NHM5	KDM2B	Lysine-specific demethylase 2B OS	-0.469641	0.397919	0.343629	0.0491453	0.0801389	0.545177
O43837	IDH3B	Isocitrate dehydrogenase [NAD] subunit beta, mitochondrial OS	0.0650316	0.398964	0.855767	0.0295395	0.0542035	0.58198
O60684	KPNA6	Importin subunit alpha-7 OS	0.146633	0.339961	0.651306	0.00746039	0.134847	0.950292
P62316	SNRPD2	Small nuclear ribonucleoprotein Sm D2 OS	0.18835	0.124639	0.278622	0.155269	0.0621293	0.175538
O14733	MAP2K7	Dual specificity mitogen-activated protein kinase kinase 7 OS	-0.495958	0.347494	0.292838	-0.0559338	0.257596	0.810327
Q8NCM8	DYNC2H1	Cytoplasmic dynein 2 heavy chain 1 OS	0.13627	0.0369165	0.120492	-0.097401	0.0435266	0.194846
P31277	HOXD11	Homeobox protein Hox-D11 OS	-0.934526	0.21367	0.102041	-0.277396	0.228702	0.336015
Q8N2K0	ABHD12	Monoacylglycerol lipase ABHD12 OS	-0.103745	0.0609783	0.250761	0.19575	0.128333	0.276349
Q9UKD2	MRTO4	mRNA turnover protein 4 homolog OS	0.0602342	0.136273	0.64434	0.274369	0.248266	0.362362
Q6ZXV5	TMTC3	Transmembrane and TPR repeat-containing protein 3 OS	0.240165	0.294001	0.454222	0.16913	0.162988	0.380796
Q13620	CUL4B	Cullin-4B OS	0.470967	0.130478	0.123154	-0.0591096	0.432366	0.878416
P42285	SKIV2L2	Superkiller viralicidic activity 2-like 2 OS	0.216374	0.0241562	0.0501519	0.0509412	0.107814	0.624989
Q99720	SIGMAR1	Sigma non-opioid intracellular receptor 1 OS	-0.320313	0.527515	0.548294	-0.18913	0.143891	0.314211
Q9UNS1	TIMELESS	Protein timeless homolog OS	-0.128994	0.197468	0.525195	-0.34411	0.241939	0.293717
O00410	IPO5	Importin-5 OS	0.560856	0.453177	0.330461	0.199971	0.0855369	0.186985
Q7Z7L1	SLFN11	Schlafen family member 11 OS	-0.184561	0.134704	0.30331	0.0640595	0.039118	0.259494
P16104	H2AFX	Histone H2AX OS	-0.72117	0.182799	0.112905	0.284862	0.55589	0.600767
O75175	CNOT3	CCR4-NOT transcription complex subunit 3 OS	0.21451	0.645846	0.720443	-0.0716447	0.0711976	0.38995
P46776	RPL27A	60S ribosomal protein L27a OS	0.131011	0.0864869	0.278034	0.0734052	0.0897511	0.45384
Q13472	TOP3A	DNA topoisomerase 3-alpha OS	-0.921983	0.250929	0.121036	-0.326564	0.23846	0.303432
O60343	TBC1D4	TBC1 domain family member 4 OS	-0.23671	0.183439	0.31913	-0.16387	0.154931	0.375157
P36542	ATP5C1	ATP synthase subunit gamma, mitochondrial OS	-0.248011	0.0642158	0.11528	-0.0113684	0.280687	0.963575
Q9NVI1	FANCI	Fanconi anemia group I protein OS	0.491997	0.408557	0.338009	0.0307048	0.0655246	0.627418
Q9UBF2	COPG2	Coatomer subunit gamma-2 OS	0.304063	0.444789	0.510754	-0.0295828	0.116748	0.780944
P57740	NUP107	Nuclear pore complex protein Nup107 OS	0.0578386	0.233145	0.785191	-0.098619	0.112182	0.431239
Q12800	TFCP2	Alpha-globin transcription factor CP2 OS	-0.747862	0.456024	0.25916	-0.0182086	0.0523464	0.708955
P39748	FEN1	Flap endonuclease 1 OS	0.0863	0.266275	0.726397	0.00763404	0.153754	0.955372
O60645	EXOC3	Exocyst complex component 3 OS	0.383193	0.34466	0.360627	-0.0416484	0.0621548	0.517114
Q96LL9	DNAJC30	DnaJ homolog subfamily C member 30 OS	-0.341039	0.102363	0.133139	-0.524516	0.0810102	0.0692513
Q9GZZ9	UBA5	Ubiquitin-like modifier-activating enzyme 5 OS	0.185863	0.147225	0.32504	-0.129131	0.138412	0.412885
P19484	TFEB	Transcription factor EB OS	-1.15316	0.475464	0.1806	-0.266544	0.291322	0.41887
P24941	CDK2	Cyclin-dependent kinase 2 OS	0.181909	0.253692	0.495557	-0.098509	0.0129315	0.0589243
Q9NTX5	ECHDC1	Ethylmalonyl-CoA decarboxylase OS	-0.0731072	0.377914	0.829994	-0.230959	0.0311731	0.0605753
O94927	HAUS5	HAUS augmin-like complex subunit 5 OS	-0.336117	0.134443	0.175475	-0.35682	0.540598	0.521905
Q9H307	PNN	Pinin OS	0.460883	0.378768	0.335131	0.323415	0.0598725	0.0828648
P46939	UTRN	Utrophin OS	0.145672	0.0480697	0.145935	0.00144411	0.142433	0.990872
Q13257	MAD2L1	Mitotic spindle assembly checkpoint protein MAD2A OS	0.502563	0.112418	0.0998686	-0.285024	0.229834	0.329903
P26196	DDX6	Probable ATP-dependent RNA helicase DDX6 OS	0.0255728	0.239093	0.904429	0.0755902	0.0588222	0.320242
P49756	RBM25	RNA-binding protein 25 OS	0.216616	0.0395987	0.0818378	0.110901	0.274557	0.669592
P61106	RAB14	Ras-related protein Rab-14 OS	0.500962	0.197222	0.172845	-0.115643	0.22612	0.601369
Q9BRK5	SDF4	45 kDa calcium-binding protein OS	0.290809	0.398557	0.49001	0.310597	0.411172	0.478988
Q7Z412	PEX26	Peroxisome assembly protein 26 OS	0.144223	0.252079	0.566921	0.0714598	0.108275	0.521934
Q7Z3U7	MON2	Protein MON2 homolog OS	0.292524	0.507849	0.564821	-0.037874	0.139619	0.766796
Q12824	SMARCB1	SWI/SNF-related matrix-associated actin-dependent regulator of chromatin subfamily B member 1 OS	-0.00110173	0.316396	0.996865	-0.220574	0.328728	0.516679
Q00325	SLC25A3	Phosphate carrier protein, mitochondrial OS	0.228595	0.227106	0.389868	0.181364	0.0921408	0.219559
O00411	POLRMT	DNA-directed RNA polymerase, mitochondrial OS	-0.128423	0.0959412	0.309396	-0.0387131	0.317789	0.89139
O75844	ZMPSTE24	CAAX prenyl protease 1 homolog OS	0.580572	0.493487	0.344529	0.191561	0.0318978	0.0746146
Q92621	NUP205	Nuclear pore complex protein Nup205 OS	0.232973	0.383143	0.547855	-0.0148271	0.0764863	0.829656
Q92538	GBF1	Golgi-specific brefeldin A-resistance guanine nucleotide exchange factor 1 OS	0.682044	0.876342	0.469518	0.0273774	0.0238995	0.352068
Q86YP4	GATAD2A	Transcriptional repressor p66-alpha OS	-0.767445	0.379371	0.214075	-0.153323	0.10099	0.277488
Q8ND56	LSM14A	Protein LSM14 homolog A OS	0.307996	0.320119	0.403485	0.0039994	0.110031	0.967304
