# Supplementary figures and images for: Ceapins block the unfolded protein response sensor ATF6α by inducing a neomorphic inter-organelle tether
Source: eLife journal article supplement (doi:10.7554/elife.46595), 2019-05-31

Torres et al. Figure 1 - figure supplement 1

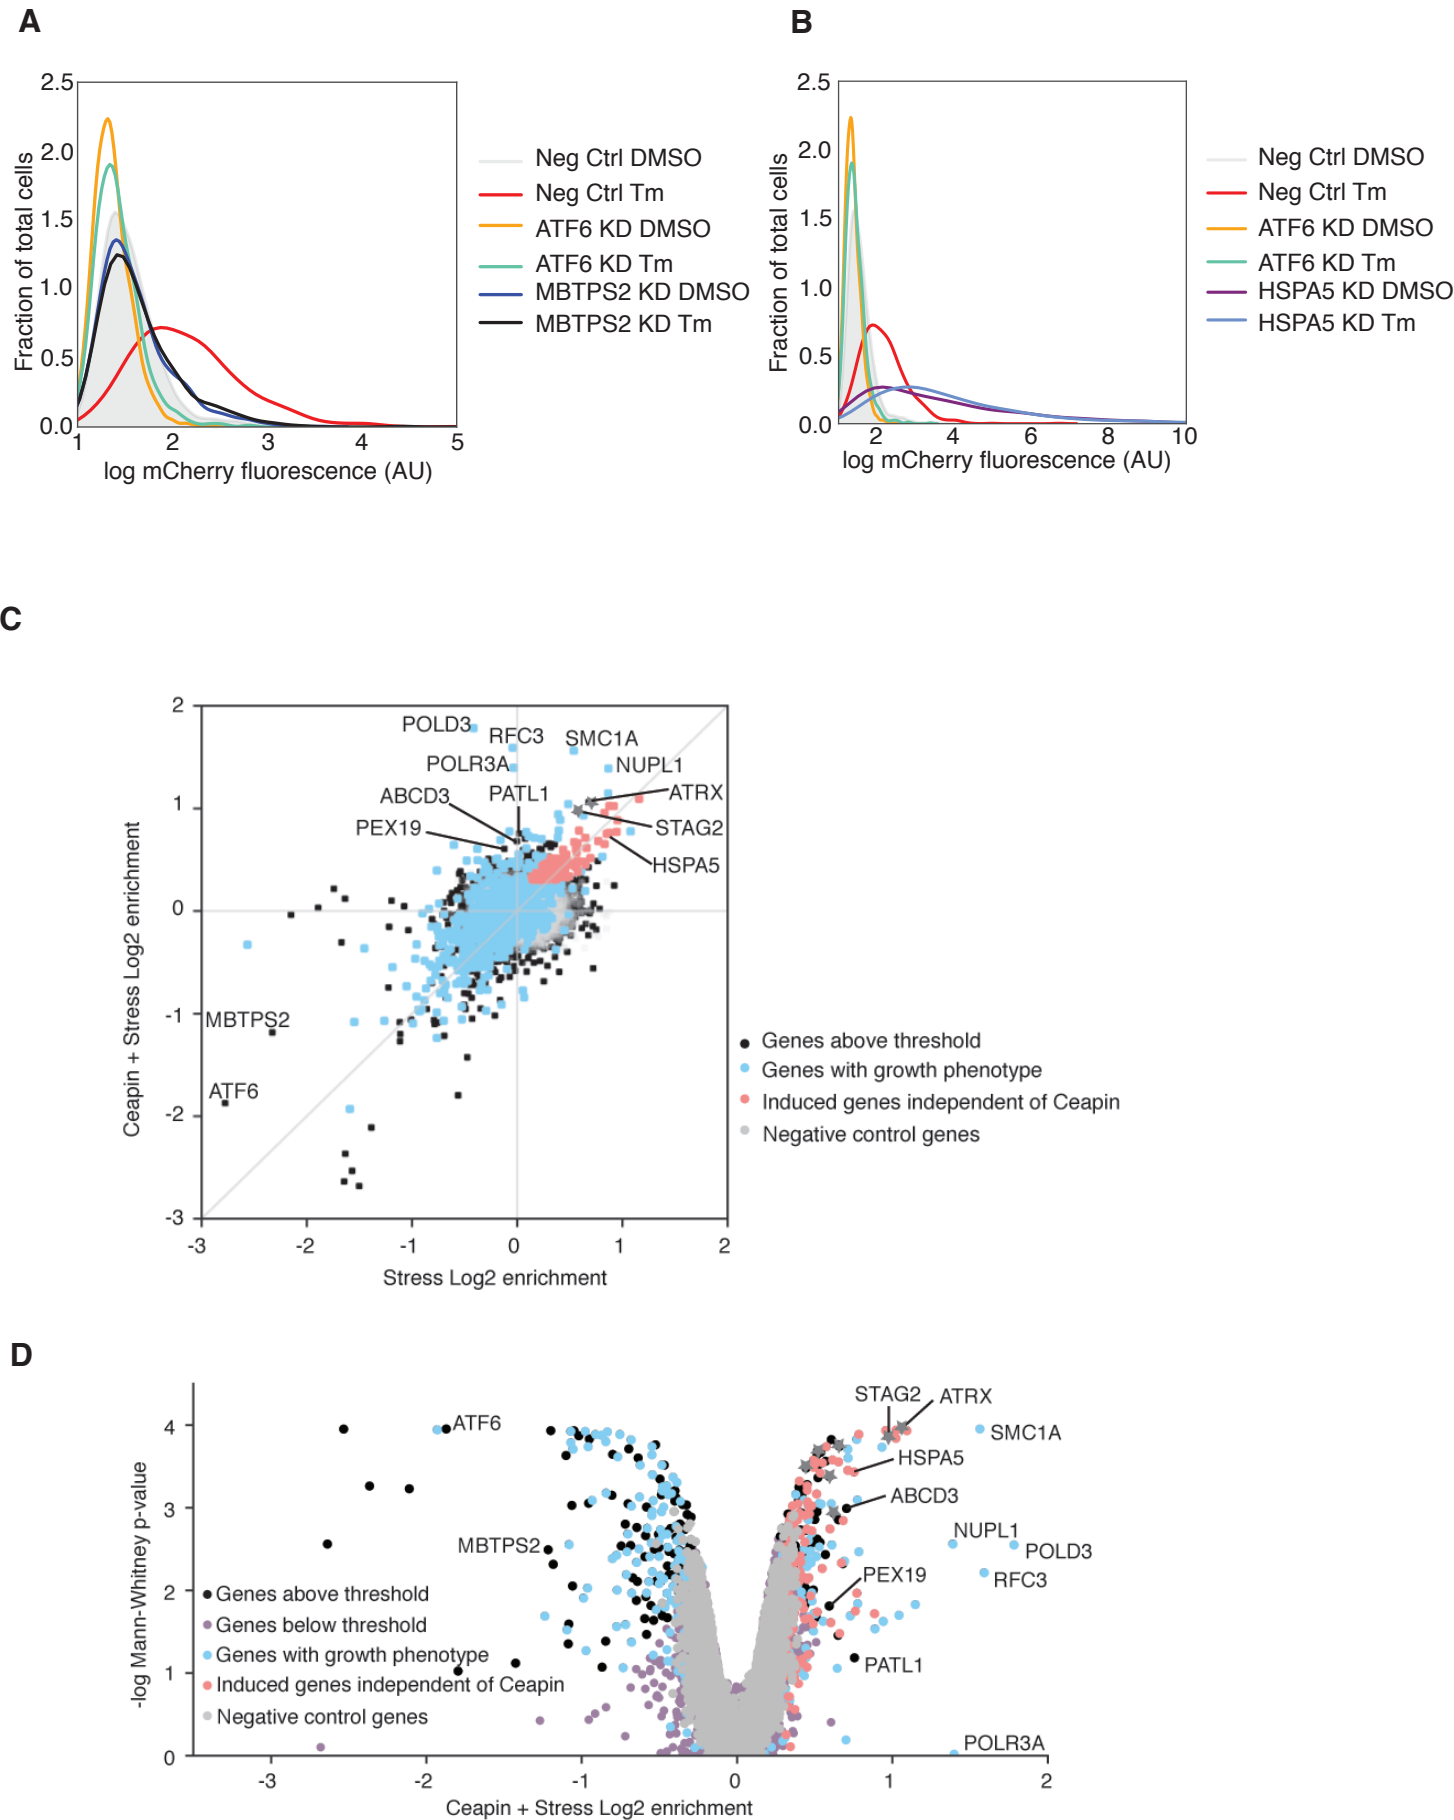

Supplement: supp [file elife_poa_e46595_Figure_1_figure_supplement_1.pdf › elife_poa_e46595_Figure_1_figure_supplement_1.pdf]

Torres et al. Figure 1- figure supplement 2

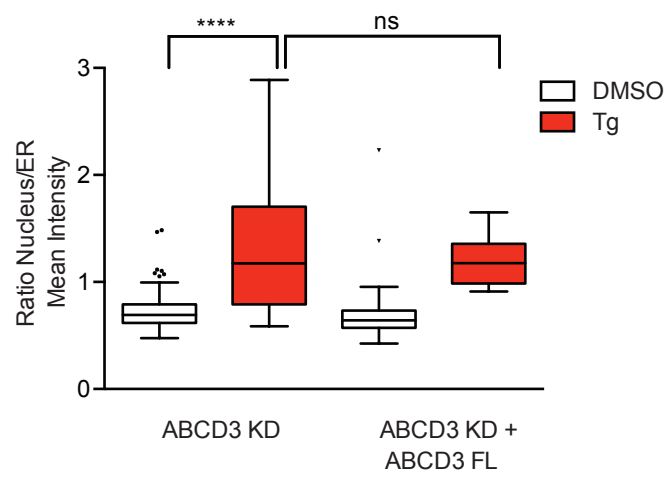

Supplement: supp [file elife_poa_e46595_Figure_1_figure_supplement_2.pdf › elife_poa_e46595_Figure_1_figure_supplement_2.pdf]

Torres et al. Figure 2 - figure supplement 1

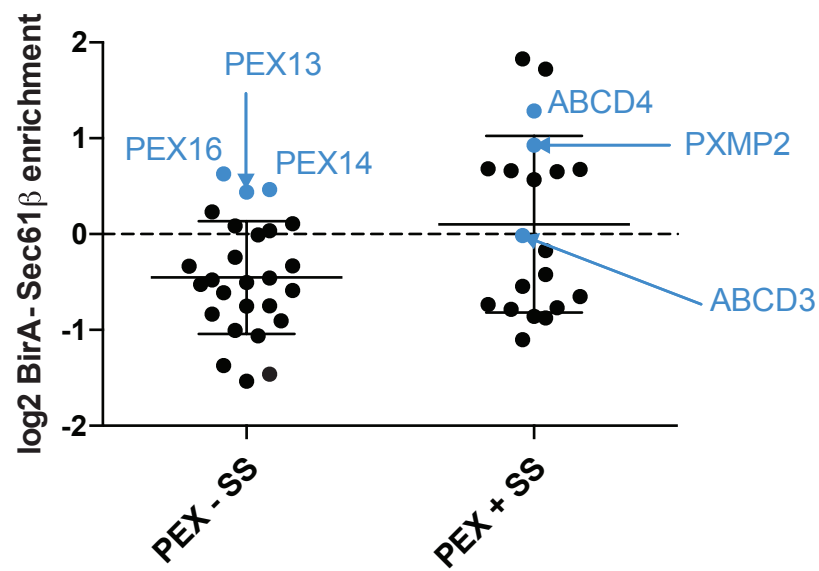

Supplement: supp [file elife_poa_e46595_Figure_2_figure_supplement_1.pdf › elife_poa_e46595_Figure_2_figure_supplement_1.pdf]

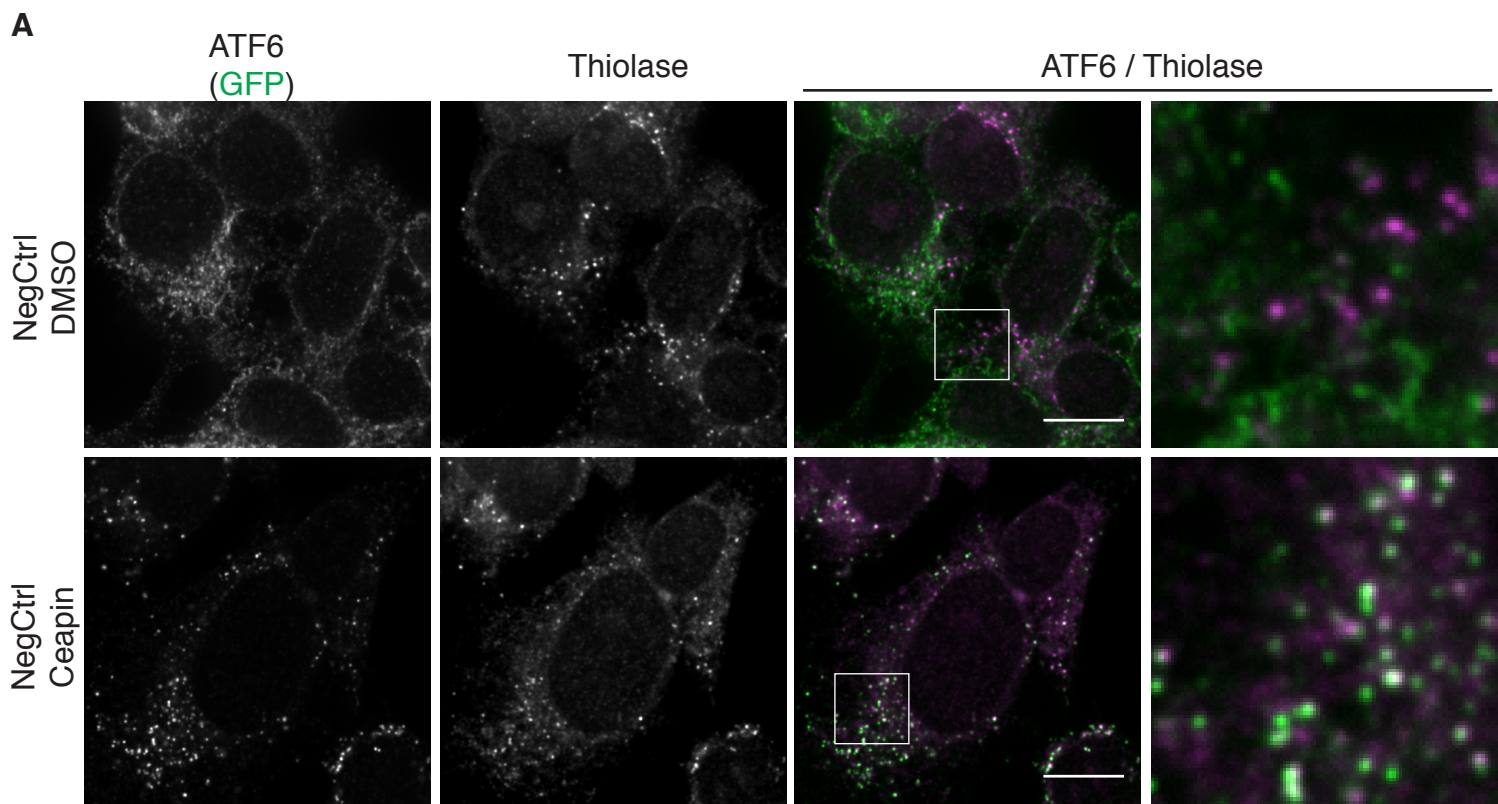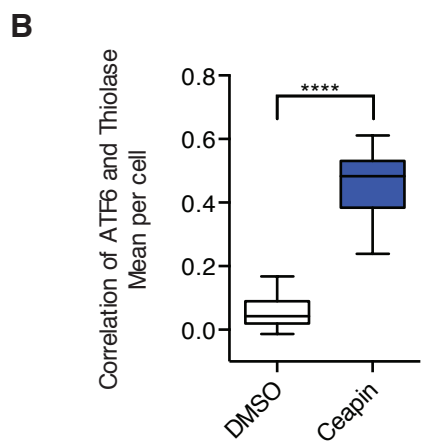

Supplement: supp [file elife_poa_e46595_Figure_2_figure_supplement_2.pdf › elife_poa_e46595_Figure_2_figure_supplement_2.pdf]

Torres et al. Figure 2 - figure supplement 3

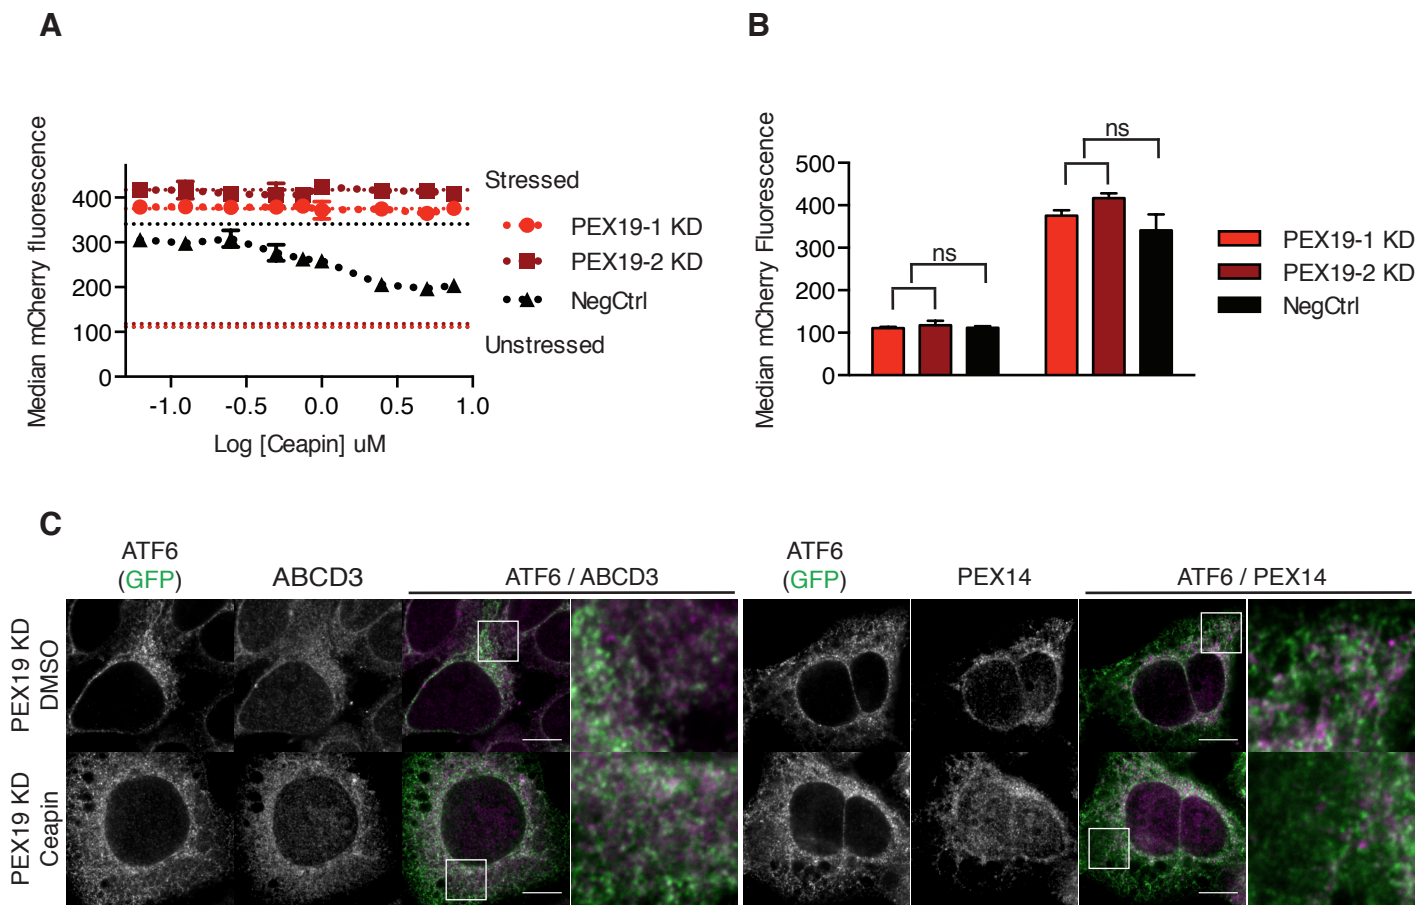

Supplement: supp [file elife_poa_e46595_Figure_2_figure_supplement_3.pdf › elife_poa_e46595_Figure_2_figure_supplement_3.pdf]

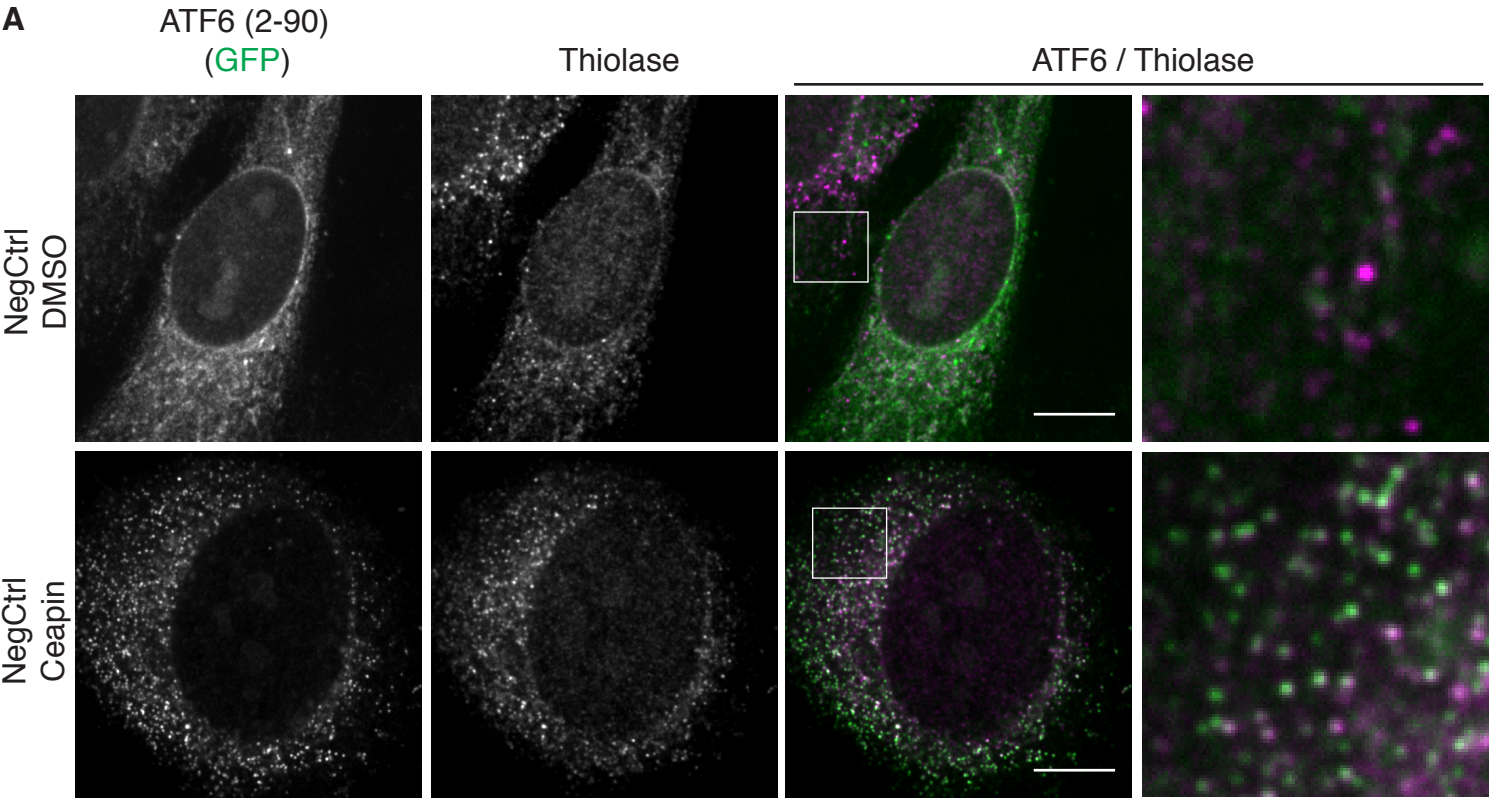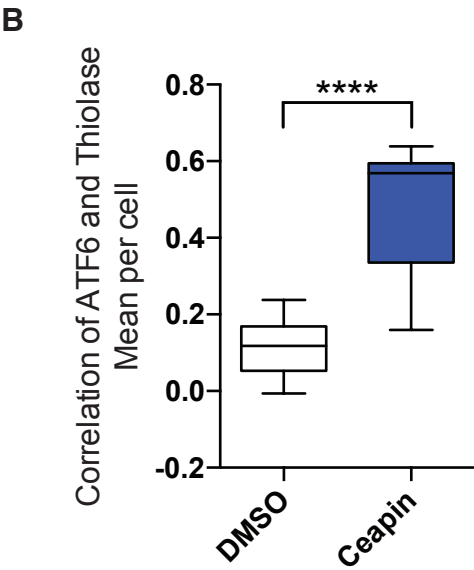

Supplement: supp [file elife_poa_e46595_Figure_5_figure_supplement_1.pdf › elife_poa_e46595_Figure_5_figure_supplement_1.pdf]

Torres et al. Figure 5 - figure supplement 2

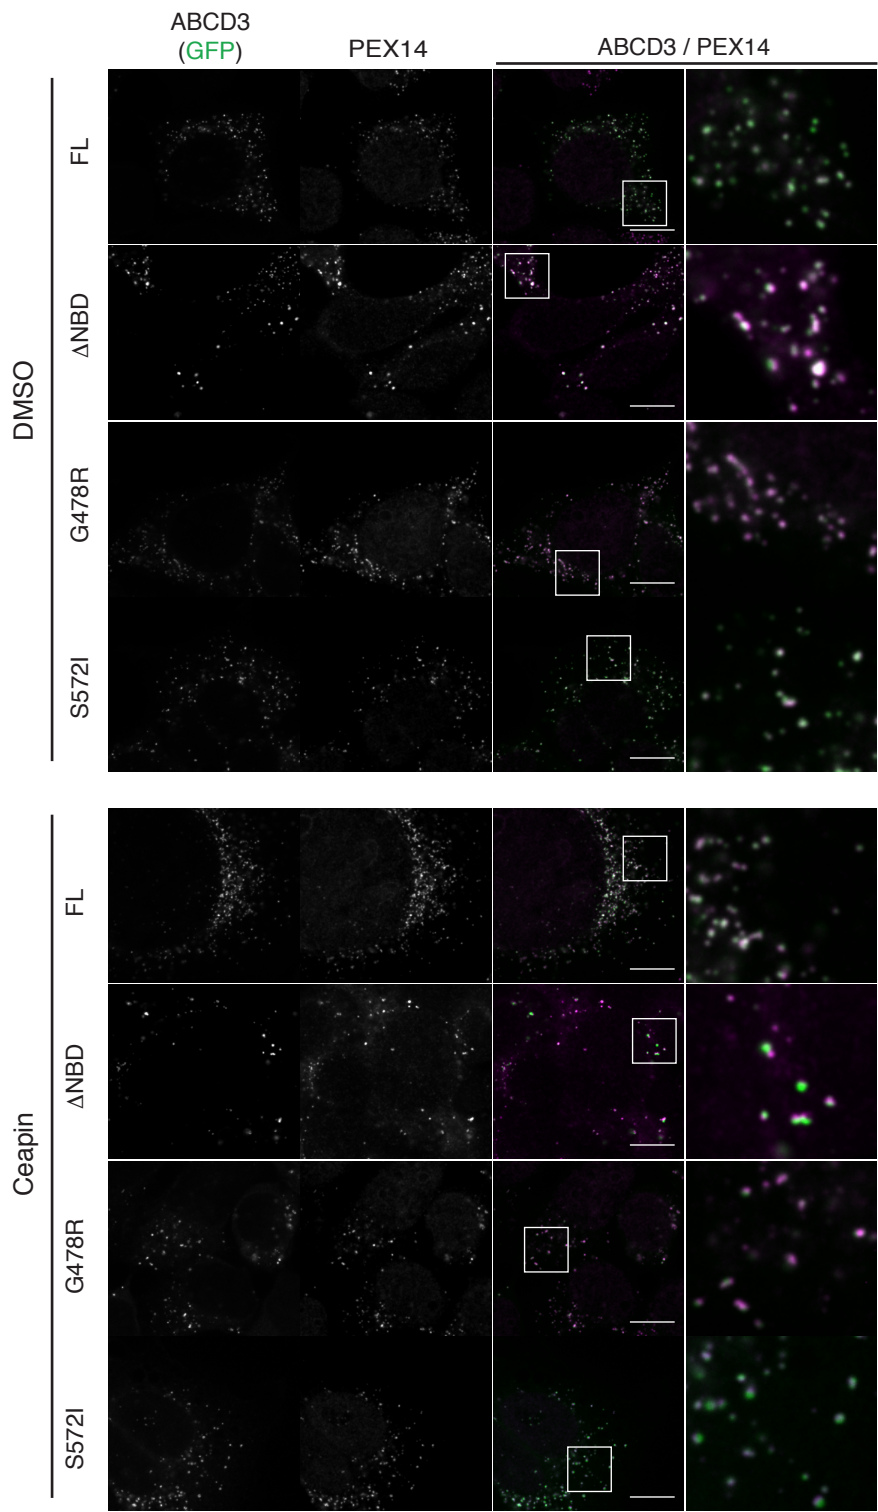

Supplement: supp [file elife_poa_e46595_Figure_5_figure_supplement_2.pdf › elife_poa_e46595_Figure_5_figure_supplement_2.pdf]
